# Supplementary material for: Asymmetric catalytic aza-Morita–Baylis–Hillman reaction (aza-MBH): an interesting functional group-caused reversal of asymmetric induction
Source: Royal Society of Chemistry journal article supplement (doi:10.1039/b814500h), 2008-01-01
Supplement: b814500h.pdf [file b814500h.pdf]

State Key Laboratory of Organometallic Chemistry, Shanghai Institute of Organic Chemistry,  
Chinese Academy of Science, 354 Fenglin Lu, Shanghai 200032 China, Fax: 86-21-64166128,  
E-mail: [mshi@mail.sioc.ac.cn](mailto:mshi@mail.sioc.ac.cn).

## **Asymmetric Catalytic aza-Morita-Baylis-Hillman Reaction (aza-MBH): A Remarkable Functional Group-Caused Reversal Asymmetric Induction**

Min Shi,\* Ming-Juan Qi, and Xu-Guang Liu

State Key Laboratory of Organometallic Chemistry, Shanghai Institute of Organic Chemistry,  
Chinese Academy of Sciences, 354 Fenglin Lu, Shanghai 200032 China,  
[mshi@mail.sioc.ac.cn](mailto:mshi@mail.sioc.ac.cn).

RECEIVED DATE (to be automatically inserted after your manuscript is accepted if required)

### Content

|                                                                |         |
|----------------------------------------------------------------|---------|
| General Remarks                                                | S2      |
| Optimization of the Reaction Conditions                        | S3      |
| Determination of ee and absolute configuration of <b>3</b>     | S4-S6   |
| General Procedure for the Preparation of <b>3</b> and <b>6</b> | S7-S8   |
| Spectroscopic Data and Charts                                  | S8-S41  |
| Chiral HPLC trace                                              | S42-S70 |
| X-Ray Crystal Data                                             | S71-S90 |

## Experimental Section.

**General Remarks.** Unless otherwise stated, all reactions were carried out under argon atmosphere. All solvents were purified by distillation. Activated olefins were obtained from Tokyo Chemical Industry (Tokyo Kasei Co. Ltd.) and used without purification. All salicyl *N*-tosylated imines<sup>[1]</sup> and organocatalyst  $\beta$ -ICPD<sup>[2]</sup> were synthesized according to the literature. Melting points were determined on a digital melting point apparatus and temperatures were uncorrected. Optical rotations were determined at 589 nm (sodium D line) by using a Perkin-Elmer-341 MC digital polarimeter;  $[\alpha]_D$ -values are given in unit of  $10 \text{ deg}^{-1} \text{ cm}^2 \text{ g}^{-1}$ . <sup>1</sup>H NMR spectra were recorded on a Bruker AM-300 spectrometer for solution in CDCl<sub>3</sub> with tetramethylsilane (TMS) as an internal standard; coupling constants *J* are given in Hz. <sup>13</sup>C NMR spectra were recorded on a Bruker AM-300 spectrophotometers (75 MHz) with complete proton decoupling spectrophotometers (CDCl<sub>3</sub>: 77.0 ppm). Infrared spectra were recorded on a Perkin-Elmer PE-983 spectrometer with absorption in  $\text{cm}^{-1}$ . Flash column chromatography was performed using 300-400 mesh silica gel. For thin-layer chromatography (TLC), silica gel plates (Huanghai GF254) were used. Chiral HPLC was performed on a SHIMADZU SPD-10A *vp* series with chiral columns (Chiralpak AD-H, and OD-H columns 4.6 x 250 mm, (Daicel Chemical Ind., Ltd.)). Elementary analysis was taken on a Carlo-Erba 1106 analyzer. Mass spectra were recorded by EI, and HRMS was measured on a HP-5989 instrument. The corresponding racemates of **3** were prepared according to previous paper.<sup>[3]</sup>

In optimization studies, aza-MBH reaction of imine **1a** with **2a** catalysed by  $\beta$ -ICPD (10 mol%) was carried out in a series of solvents such as DCM, acetonitrile (MeCN), ethyl acetate (EA) and dioxane as well as at various temperatures. We found that the best reaction conditions are to carry out the reaction in THF at  $-30\text{ }^{\circ}\text{C}$ . Solvent effects are outlined in Table SI-1, indicating that solvents DCM, MeCN, EA and dioxane are not as effective as THF.

**Table SI-1.** Solvent effects in aza-MBH reaction of salicyl *N*-tosylimines with MVK **2a** catalyzed by  $\beta$ -ICPD.

| <b>1a</b> + <b>2a</b> |         | $\beta$ -ICPD (10 mol%)<br>solvent, $-30\text{ }^{\circ}\text{C}$ |                      |                 | <b>3a</b> |
|-----------------------|---------|-------------------------------------------------------------------|----------------------|-----------------|-----------|
| entry                 | solvent | time/h                                                            | yield/% <sup>a</sup> | ee <sup>b</sup> |           |
| 1                     | DCM     | 48                                                                | 86                   | 78              |           |
| 2                     | MeCN    | 60                                                                | 91                   | 73              |           |
| 3                     | EA      | 24                                                                | 87                   | 85              |           |
| 4                     | Dioxane | 24                                                                | 98                   | 86              |           |

<sup>a</sup> Isolated yields. <sup>b</sup> Determined by chiral HPLC.

Determination of the enantiomeric excesses of **3**.

The racemates of **3** in the aza-MBH reaction of salicyl *N*-tosylimines with MVK and EVK were easily obtained in moderate to excellent yields in the presence of 1,4-diazabicyclo[2,2,2]octane (DABCO) (10 mol%) in toluene or THF according to our previous paper.<sup>[3]</sup> The achieved ee of the corresponding aza-MBH adduct **3** was determined by chiral HPLC or after converting to its acetate **6** (92% ee) by treatment with acetyl chloride in the presence of triethylamine (Et<sub>3</sub>N) in dichloromethane (DCM) (Scheme SI-1) (also see the following chiral HPLC).

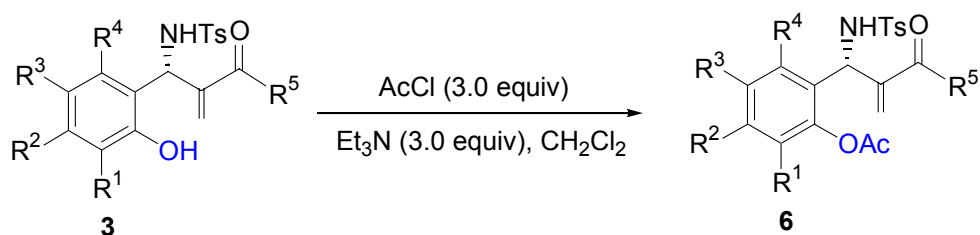

**Scheme SI-1.** Acylation of adduct **3** with acetyl chloride in the presence of triethylamine.

Determination of the absolute configuration of **3**.

Moreover, the absolute structure of the product **3a** was also determined by converting **3a** to **6a** and its derivative **7a**, which was obtained by treatment of **3a** with 4-bromobenzoyl chloride in DCM in the presence of Et<sub>3</sub>N (Scheme SI-2). The single crystals of **6a** and **7a** suitable for X-ray crystal structural analyses could be obtained by recrystallization from DCM and hexane (1/4). Their ORTEP drawings have been shown in Figures 1 and 2.<sup>[4]</sup> We utilized compound **7a** containing a bromine atom on the benzene ring for X-ray diffraction because more reliable result could be obtained when a heavy atom such as “Br” is included in the substrate.<sup>[5]</sup>

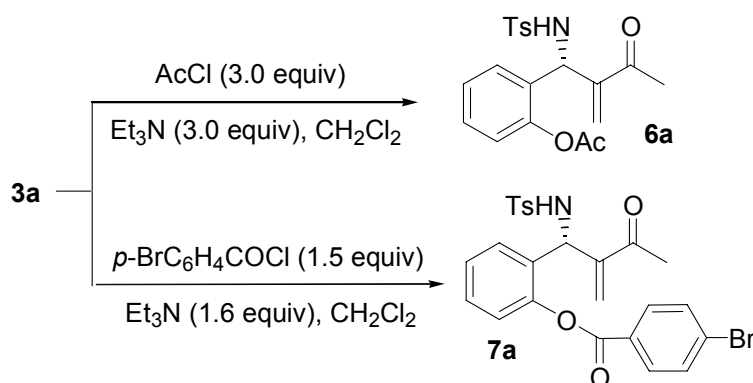

Scheme SI-2. Acylation of **3a** in DCM.

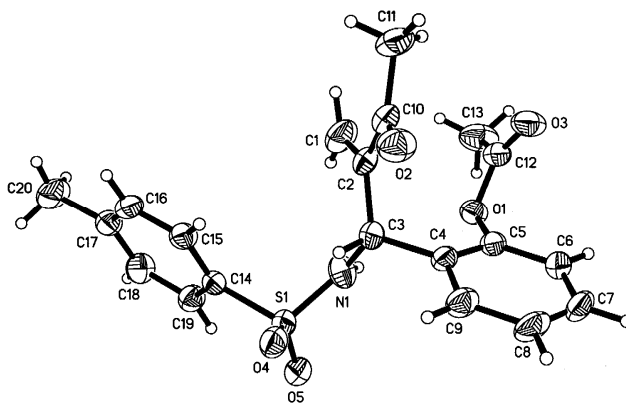

Figure 1. ORTEP drawing of **6a**

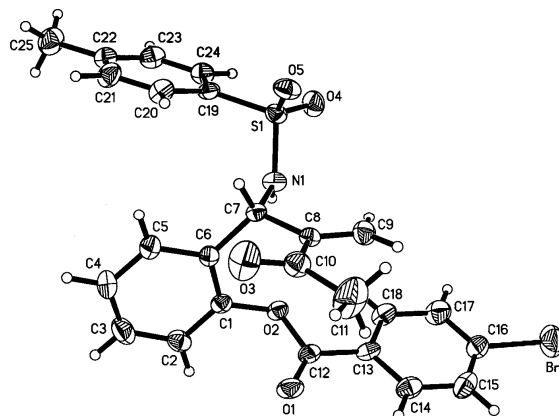

**Figure 2.** ORTEP drawing of **7a**.

### General Procedure for the Preparation of **3** and **6** Using **3a** or **6a** as an Example.

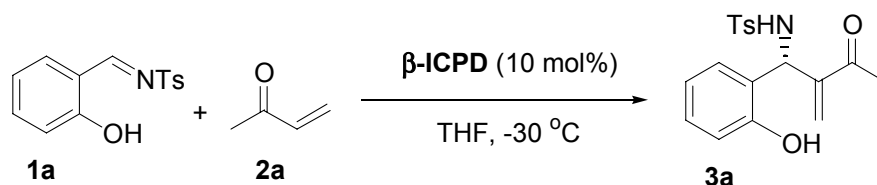

To a solution of **1a** (0.25 mmol, 61 mg) and catalyst [e.g.:  $\beta$ -ICPD (0.025 mmol, 13 mg)] in 1.0 mL of THF was added MVK (41  $\mu\text{L}$ , 0.50 mmol) at  $-30\text{ }^{\circ}\text{C}$  under argon atmosphere. The reaction solution was monitored by TLC plates. After completion, the solution was directly transferred for purification by a silica gel column chromatography (eluent: EtOAc/PE = 2/3) to give the corresponding compound **3a** in >99% yield and 91% ee (see the Chiral HPLC shown below).

**N-(3-Acetyl-3,4-dihydro-2H-chromen-4-yl)-4-methylbenzenesulfonamide 3a**: White solid (plates obtained by recrystallization from  $\text{CH}_2\text{Cl}_2/\text{PE} = 3/1$ ),  $[\alpha]_{\text{D}}^{20}$  77 (c 1.6,  $\text{CHCl}_3$ ), mp:  $80\text{-}82\text{ }^{\circ}\text{C}$ . IR (KBr)  $\nu$  3411, 3161, 1688, 1599, 1454, 1322, 1152  $\text{cm}^{-1}$ ;  $^1\text{H}$  NMR ( $\text{CDCl}_3$ , TMS, 300 MHz)  $\delta$  2.25 (3H, s, Me), 2.38 (3H, s, Me), 5.49 (1H, d,  $J = 7.3$  Hz, CH), 5.70 (1H, d,  $J = 7.3$  Hz, NH), 6.17 (1H, s, =CH), 6.22 (1H, s, =CH), 6.66 (1H, s, OH), 6.72-6.79 (2H, m, Ar), 6.94 (1H, d,  $J = 7.2$  Hz, Ar), 7.08 (1H, t,  $J = 7.0$  Hz, Ar), 7.18 (2H, d,  $J = 8.3$  Hz, Ar), 7.61 (2H, d,  $J = 8.3$  Hz, Ar);  $^{13}\text{C}$  NMR ( $\text{CDCl}_3$ , TMS, 75 MHz)  $\delta$  21.5, 26.2, 53.4, 117.0, 120.7, 124.8, 127.1, 128.0, 128.1, 129.1, 129.4, 136.4, 143.5, 146.4, 153.1, 200.0; MS (EI)  $m/e$  190 ( $\text{M}^+$ -155, 64.2), 148 ( $\text{M}^+$ -167, 62.7), 131 ( $\text{M}^+$ -214, 76.7), 91 ( $\text{M}^+$ -254, 100.0), 65 ( $\text{M}^+$ -280, 45.4), 43 ( $\text{M}^+$ -302, 93.2); HRMS (MALDI) calcd. for  $\text{C}_{18}\text{H}_{19}\text{NO}_4\text{SNa}^+$ : 368.0927, Found: 368.0934.

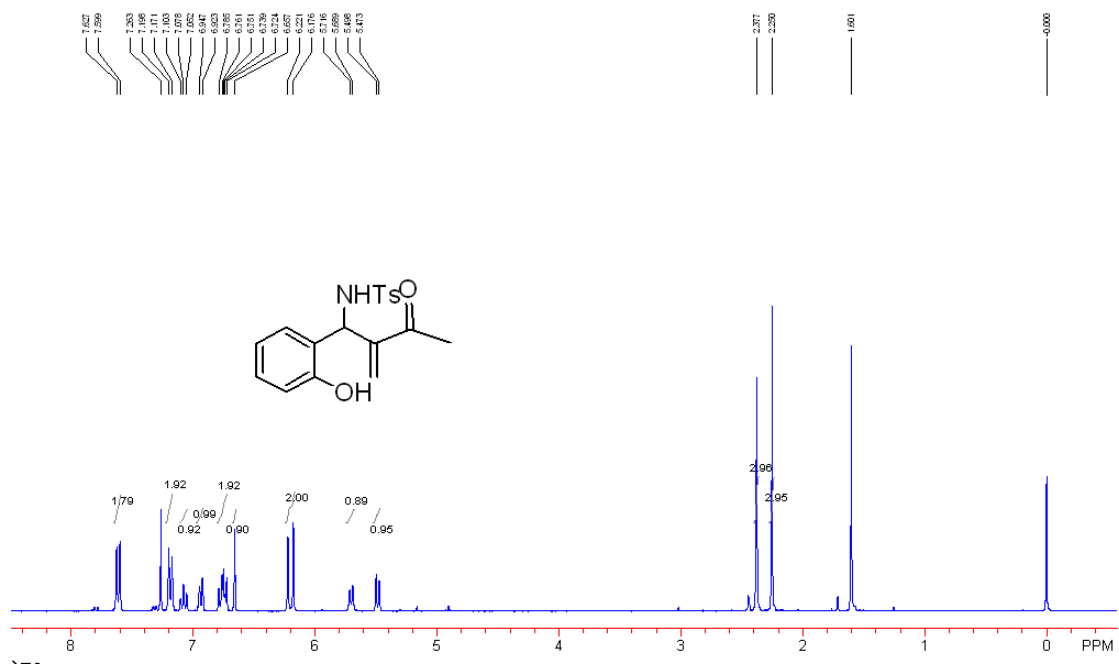



Chiral HPLC trace

Software Version: 4.1<2F12>  
 Date: 08-3-10 15:08  
 Sample Name : LQd-9-38-2+/-  
 Data File : D:\CS\D\_099.RAW Date: 08-3-10 14:31  
 Sequence File: D:\CS\D.SEQ Cycle: 1 Channel : A  
 Instrument : 970A\_0 Rack/Vial: 0/0 Operator: d-1  
 Sample Amount : 1.0000 Dilution Factor : 1.00

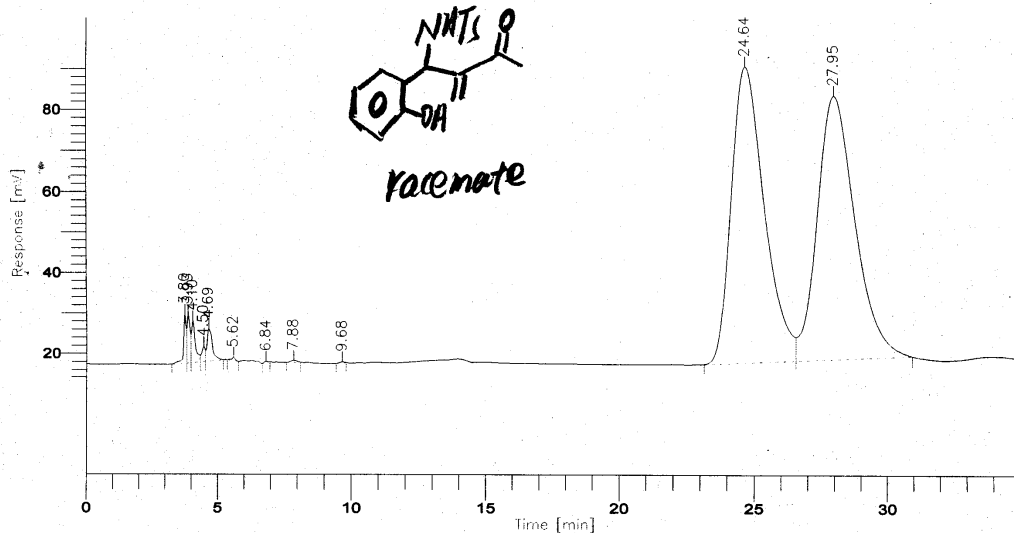

DEFAULT REPORT

| Peak # | Time [min] | Area [uv*sec] | Height [uv] | Area [%] | BL |
|--------|------------|---------------|-------------|----------|----|
| 1      | 3.797      | 90312.95      | 11980.97    | 0.69     | BV |
| 2      | 3.926      | 86922.46      | 11885.91    | 0.67     | VV |
| 3      | 4.097      | 103119.56     | 10213.76    | 0.79     | VV |
| 4      | 4.500      | 33949.72      | 3693.74     | 0.26     | VV |
| 5      | 4.690      | 109000.31     | 8067.12     | 0.84     | VB |
| 6      | 5.617      | 7581.00       | 787.63      | 0.06     | BB |
| 7      | 6.842      | 3380.50       | 303.00      | 0.03     | BB |
| 8      | 7.875      | 7121.50       | 451.53      | 0.05     | BB |
| 9      | 9.683      | 3168.00       | 262.37      | 0.02     | BB |
| 10     | 24.639     | 6196057.31    | 72682.17    | 47.47    | BV |
| 11     | 27.949     | 6412865.69    | 64741.24    | 49.13    | VB |

13053479.00 185069.65 100.00

racemate

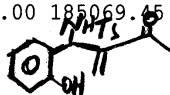

Chiral HPLC report: racemate **3a** with a Chiralpak OD-H column: hexane/*i*PrOH = 90/10, 0.8 mL/min, 214 nm,  $t_{major}$  = 24.35 min,  $t_{minor}$  = 28.08 min.

Chiral HPLC trace

Software Version: 4.1<2F12>  
Date: 08-3-10 15:50  
Sample Name : LQd-9-54  
Data File : D:\CS\D\_100.RAW Date: 08-3-10 15:13  
Sequence File: D:\CS\D.SEQ Cycle: 1 Channel : A  
Instrument : 970A - 0 Rack/Vial: 0/0 Operator: d-1  
Sample Amount : 1.0000 Dilution Factor : 1.00

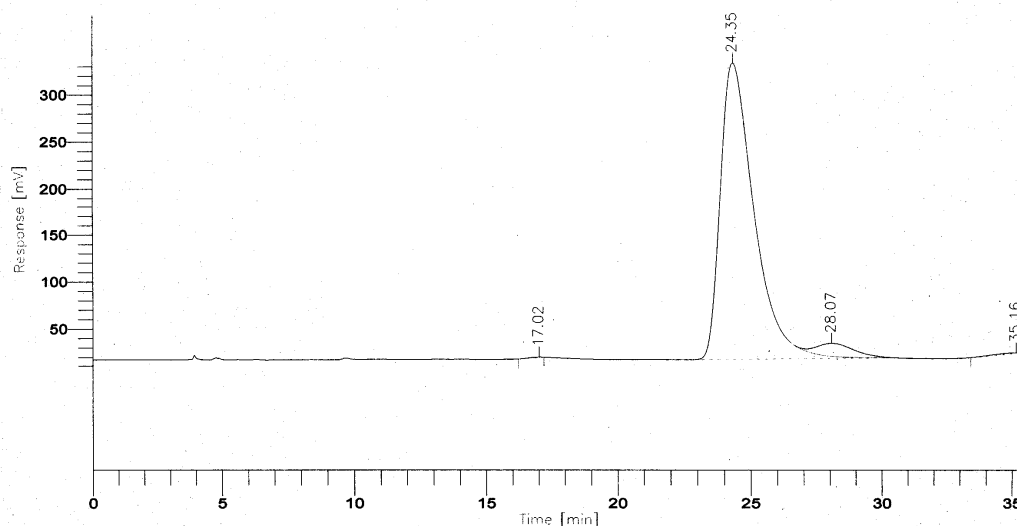

DEFAULT REPORT

| Peak # | Time [min] | Area [uv*sec] | Height [uv] | Area [%] | BL |
|--------|------------|---------------|-------------|----------|----|
| 1      | 17.017     | 21417.00      | 460.53      | 0.07     | BB |
| 2      | 24.351     | 27779265.00   | 315651.87   | 95.00    | BE |
| 3      | 28.071     | 1369386.00    | 13633.37    | 4.68     | EB |
| 4      | 35.158     | 70562.00      | 540.84      | 0.24     | BB |

-----  
29240630.00 330286.61 100.00

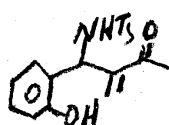

ee% = 91%

OD-H 90/10 0.8 214

Chiral HPLC report: Enantiomeric excess of **3a** was determined by HPLC with a Chiralpak OD-H column: hexane/*i*PrOH = 90/10, 0.8 mL/min, 214 nm,  $t_{major}$  = 24.35 min,  $t_{minor}$  = 28.08 min; 91% ee.

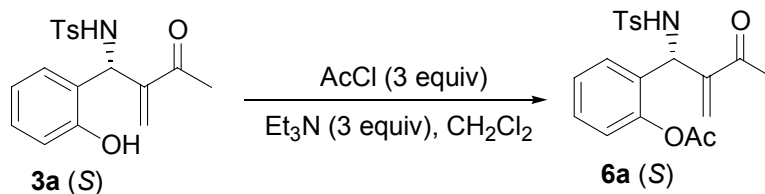

To a solution of **3a** (0.10 mmol, 35 mg) in 1.0 mL of DCM was added Et<sub>3</sub>N (42 μL, 0.30 mmol) and AcCl (21 μL, 0.3 mmol) at 0 °C under argon atmosphere, then the solution was stirred at room temperature. The reaction solution was monitored by TLC plates. After completion, the solvent was removed under reduced pressure and the residue was purified by a silica gel column chromatography (eluent: EtOAc/PE = 1/2) to give the corresponding compound **6a** in excellent yield.

**2-(2-Methylene-1-(4-methylphenylsulfonamido)-3-oxobutyl)phenyl acetate 6a:** White solid (needles obtained by recrystallization from CH<sub>2</sub>Cl<sub>2</sub>/PE = 5/1); [ $\alpha$ ]<sub>D</sub><sup>20</sup> 10 (c 1.5, CHCl<sub>3</sub>); mp. 98-100 °C; IR (KBr)  $\nu$  3282, 2920, 1766, 1678, 1330, 1200, 1161 cm<sup>-1</sup>; <sup>1</sup>H NMR (CDCl<sub>3</sub>, TMS, 300 MHz)  $\delta$  2.16 (3H, s, Me), 2.27 (3H, s, Me), 2.36 (3H, s, Me), 5.54 (1H, s, CH), 5.54 (1H, s, NH), 6.07 (1H, s, =CH), 6.09 (1H, s, =CH), 6.95 (1H, d,  $J$  = 7.8 Hz, Ar), 7.01-7.06 (1H, m, Ar), 7.11-7.13 (1H, m, Ar), 7.22-7.27 (1H, m, Ar), 7.25 (2H, d,  $J$  = 8.4 Hz, Ar), 7.62 (2H, d,  $J$  = 8.4 Hz, Ar). MS (ESI)  $m/e$  388 (M<sup>+</sup>+H); HPLC: AD column;  $\lambda$  = 230 nm; eluent: Hexane/Isopropanol = 70/30; Flow rate: 0.7 mL/min;  $t_{\text{major}}$  = 14.79 min,  $t_{\text{minor}}$  = 10.96 min;  $ee\%$  = 92% (please see the Chiral HPLC trace shown in S49).

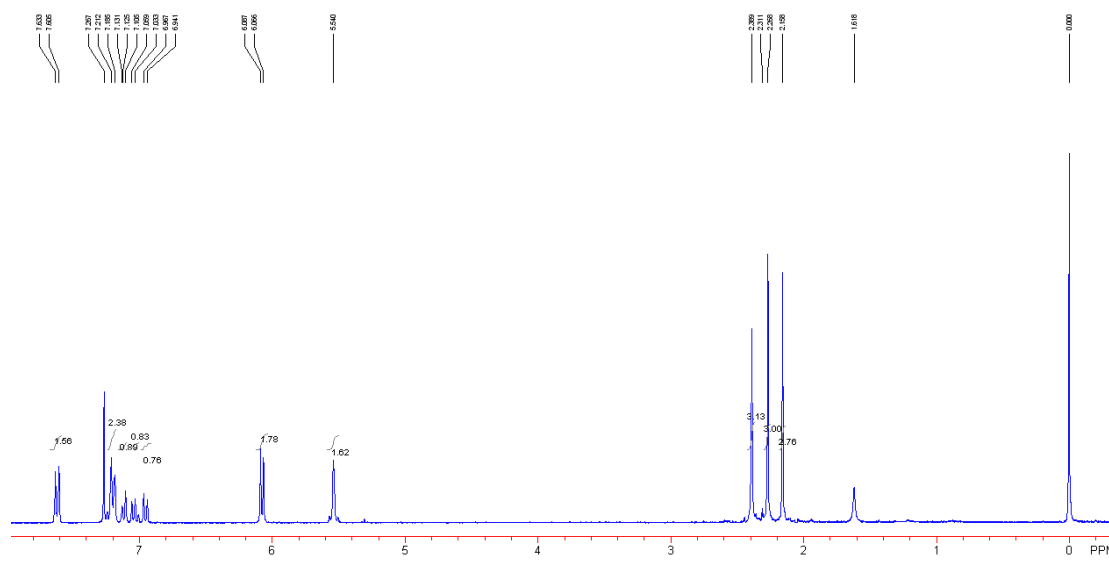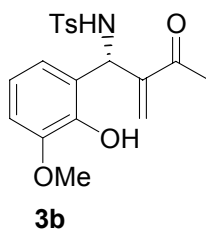

**N-(1-(2-Hydroxy-3-methoxyphenyl)-2-methylene-3-oxobutyl)-4-methylbenzenesulfonamide**

**3b**: White solid (plates obtained by recrystallization from EtOAc/PE = 4/1); yield: 99.5%; *ee* 93%;  $[\alpha]_D^{20}$  63 (c 0.66, CHCl<sub>3</sub>); mp: 107-111 °C. IR (KBr)  $\nu$  3306, 2925, 1673, 1596, 1481, 1442, 1333, 1273, 1223, 1159, 1055 cm<sup>-1</sup>; <sup>1</sup>H NMR (CDCl<sub>3</sub>, TMS, 300 MHz)  $\delta$  2.20 (3H, s, Me), 2.35 (3H, s, Me), 3.81 (3H, s, Me), 5.58 (1H, d, *J* = 9.6 Hz, CH), 5.79 (1H, s, OH), 5.99 (1H, d, *J* = 9.6 Hz, NH), 6.09 (1H, s, =CH), 6.18 (1H, s, =CH), 6.66-6.64 (2H, m, Ar), 6.72-6.70 (1H, m, Ar), 7.12 (2H, d, *J* = 8.0 Hz, Ar), 7.60 (2H, d, *J* = 8.0 Hz, Ar); <sup>13</sup>C NMR (CDCl<sub>3</sub>, TMS, 75 MHz)  $\delta$  21.4, 26.3, 54.0, 56.0, 109.7, 119.6, 121.1, 124.0, 127.1, 127.2, 127.2, 129.1, 137.3, 142.5, 142.9, 146.2, 198.6. MS (EI) *m/e* 375 (M<sup>+</sup>, 0.6), 204 (M<sup>+</sup>-171, 66.5), 161 (M<sup>+</sup>-214, 100.0). HRMS (MALDI) calcd. for C<sub>19</sub>H<sub>21</sub>NO<sub>5</sub>SNa<sup>+</sup>: 398.1032, Found: 398.1024.

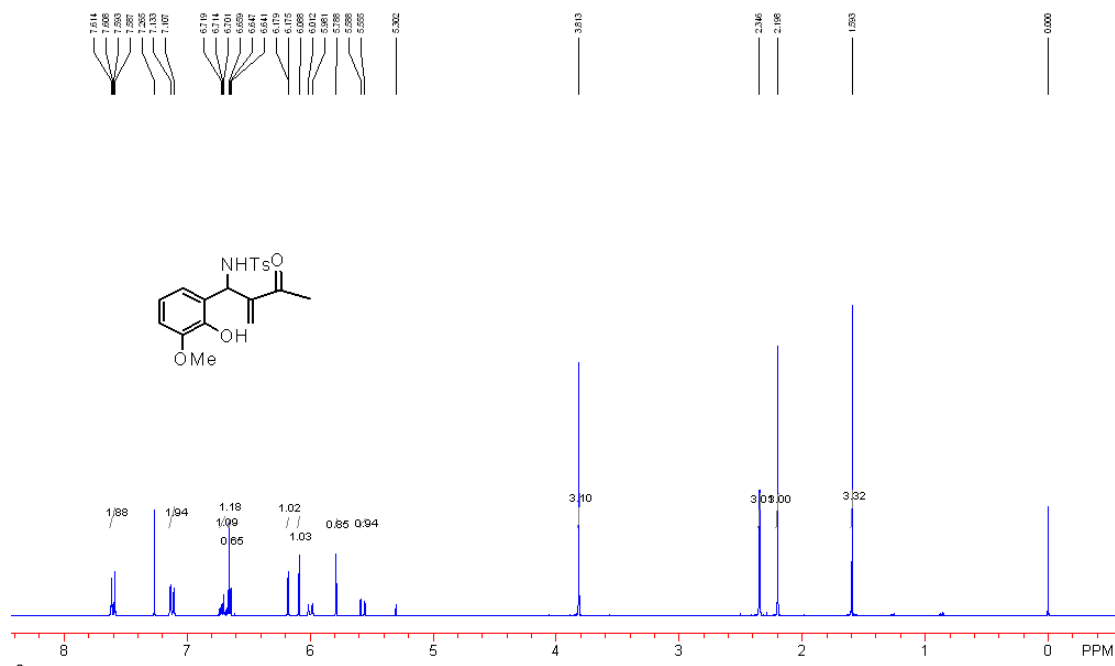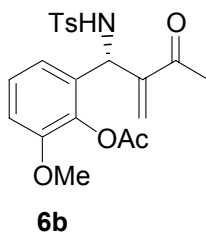

**2-Methoxy-6-(2-methylene-1-(4-methylphenylsulfonamido)-3-oxobutyl)phenyl acetate 6b:**

Yellow solid (plates obtained by recrystallization from  $\text{CH}_2\text{Cl}_2/\text{PE} = 8/1$ ); *ee* 93%;  $[\alpha]_{\text{D}}^{20}$  58 (c 0.33,  $\text{CHCl}_3$ ); mp. 110-112 °C; IR (KBr)  $\nu$  3282, 2925, 1767, 1679, 1481, 1440, 1277, 1162, 1054  $\text{cm}^{-1}$ ;  $^1\text{H}$  NMR ( $\text{CDCl}_3$ , TMS, 300 MHz)  $\delta$  2.15 (3H, s, Me), 2.25 (3H, s, Me), 2.38 (3H, s, Me), 3.76(3H, s, Me), 5.48-5.56 (1H, m, CH), 5.48-5.56 (1H, m, NH), 6.01 (1H, s, =CH), 6.05 (1H, s, =CH), 6.71 (1H, dd,  $J = 1.2, 8.1$  Hz, Ar), 6.80 (1H, dd,  $J = 1.2, 8.1$  Hz, Ar), 6.99 (1H, t,  $J = 8.1$  Hz, Ar), 7.19 (2H, d,  $J = 8.4$  Hz, Ar), 7.63 (2H, d,  $J = 8.4$  Hz, Ar). MS (ESI)  $m/e$  418 ( $\text{M}^+ + \text{H}$ ); HPLC: OD column;  $\lambda = 230$  nm; eluent: Hexane/Isopropanol = 75/25; Flow rate: 0.6 mL/min;  $t_{\text{major}} = 13.63$  min,  $t_{\text{minor}} = 27.46$  min; *ee*% = 93%.

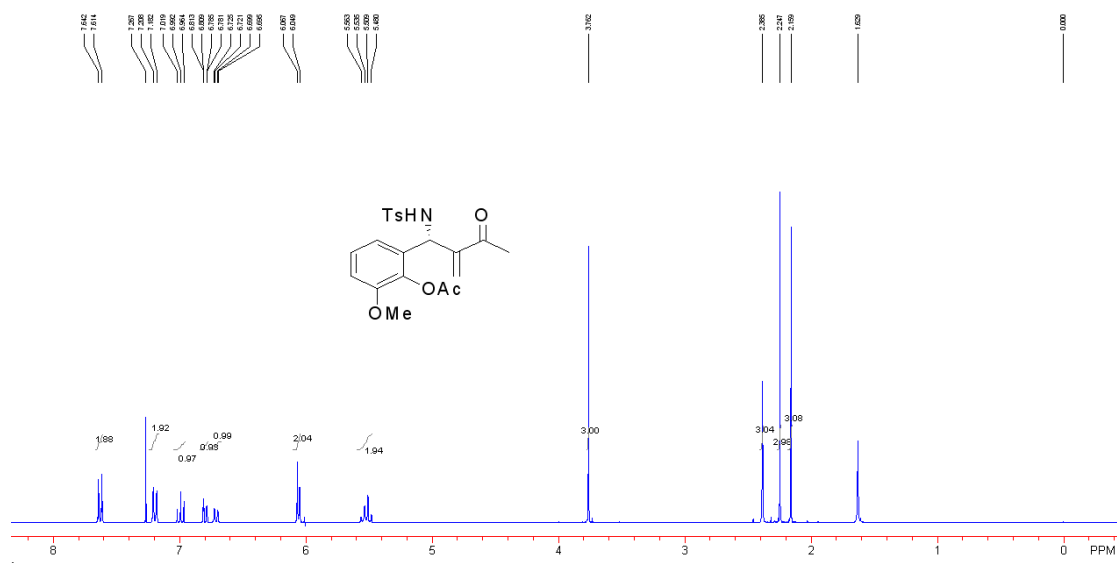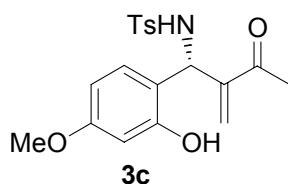

***N*-(1-(2-Hydroxy-4-methoxyphenyl)-2-methylene-3-oxobutyl)-4-methylbenzenesulfonami**

**de 3c:** White solid (needles obtained by recrystallization from EtOAc/PE = 5/1); yield: 98%; *ee* 92%;  $[\alpha]_D^{20}$  147 (c 0.51, CHCl<sub>3</sub>); mp: 110-112 °C. IR (KBr)  $\nu$  2923, 2839, 1920, 1703, 1674, 1618, 1519, 1444, 1320, 1160, cm<sup>-1</sup>; <sup>1</sup>H NMR (CDCl<sub>3</sub>, TMS, 300 MHz)  $\delta$  2.22 (3H, s, Me), 2.37 (3H, s, Me), 3.67(3H, s, Me), 5.45 (1H, d, *J* = 7.8 Hz, CH), 5.99 (1H, d, *J* = 7.8 Hz, NH), 6.12 (1H, s, =CH), 6.17 (1H, s, =CH), 6.22-6.25 (2H, m, Ar), 6.82 (1H, d, *J* = 9.3 Hz, Ar), 7.16 (2H, d, *J* = 8.1 Hz, Ar), 7.59 (2H, d, *J* = 8.1 Hz, Ar); <sup>13</sup>C NMR (CDCl<sub>3</sub>, TMS, 75 MHz)  $\delta$  21.4, 26.2, 53.1, 55.2, 102.5, 106.5, 117.2, 127.1, 127.7, 128.8, 129.4, 136.4, 143.4, 146.6, 154.3, 160.2, 200.0; MS (MALDI) *m/e* 398 (M<sup>+</sup>+23, 100.0). HRMS (MALDI) calcd. for C<sub>19</sub>H<sub>21</sub>NO<sub>5</sub>SNa<sup>+</sup>: 398.1032, Found: 398.1030.

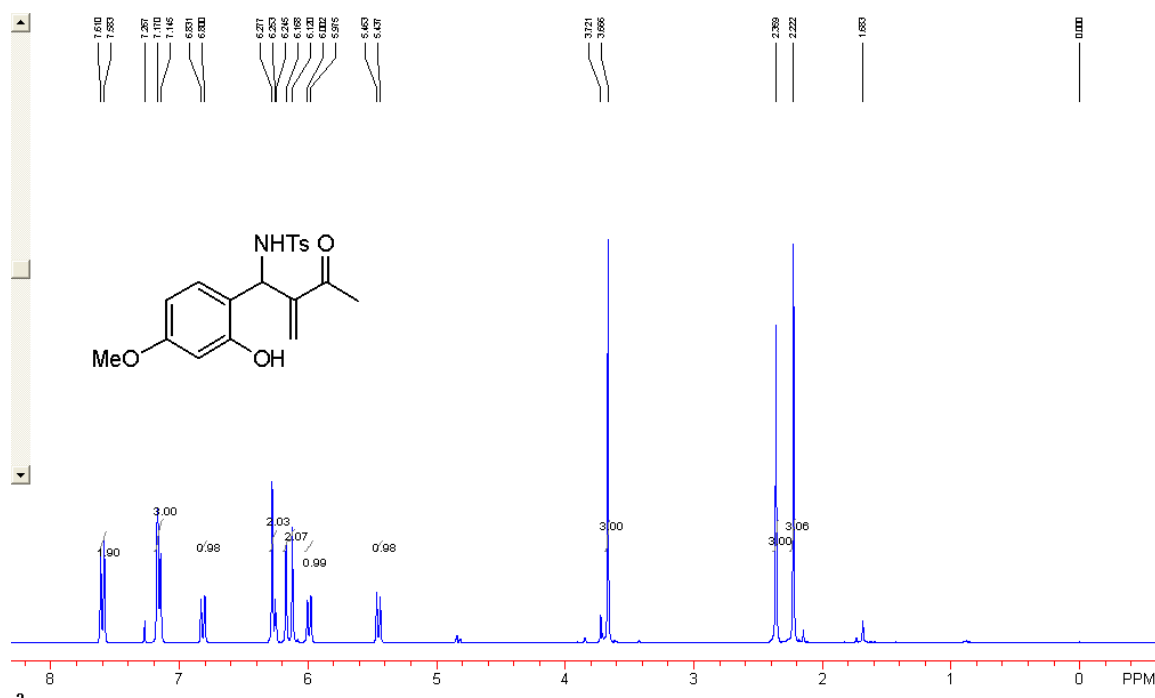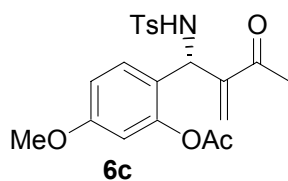

**5-Methoxy-2-(2-methylene-1-(4-methylphenylsulfonamido)-3-oxobutyl)phenyl acetate 6c:**

White solid (cubes obtained by recrystallization from  $\text{CH}_2\text{Cl}_2/\text{PE} = 5/1$ );  $ee$  92%;  $[\alpha]_{\text{D}}^{20}$  47 (c 0.27,  $\text{CHCl}_3$ ); mp:121-123 °C; IR (KBr)  $\nu$  3281, 2924, 1769, 1679, 1617, 1506, 1431, 1369, 1034, 815  $\text{cm}^{-1}$ ;  $^1\text{H}$  NMR ( $\text{CDCl}_3$ , TMS, 300 MHz)  $\delta$  2.15 (3H, s, Me), 2.25 (3H, s, Me), 2.40 (3H, s, Me), 3.73 (3H, s, Me), 5.39 (1H, d,  $J = 8.0$  Hz, CH), 5.47 (1H, d,  $J = 8.0$  Hz, NH), 6.05 (1H, s, =CH), 6.07 (1H, s, =CH), 6.50 (1H, s, Ar), 6.58 (1H, d,  $J = 9.1$  Hz, Ar), 6.98 (1H, d,  $J = 9.1$  Hz, Ar), 7.21 (2H, d,  $J = 8.1$  Hz, Ar), 7.62 (2H, d,  $J = 8.1$  Hz, Ar). MS (ESI)  $m/e$  435 ( $\text{M}^+ + 18$ ); HPLC: AD column;  $\lambda = 230$  nm; eluent: Hexane/Isopropanol = 70/30; Flow rate: 0.5 mL/min;  $t_{\text{major}} = 18.80$  min;  $t_{\text{minor}} = 32.38$  min;  $ee\% = 92\%$ .

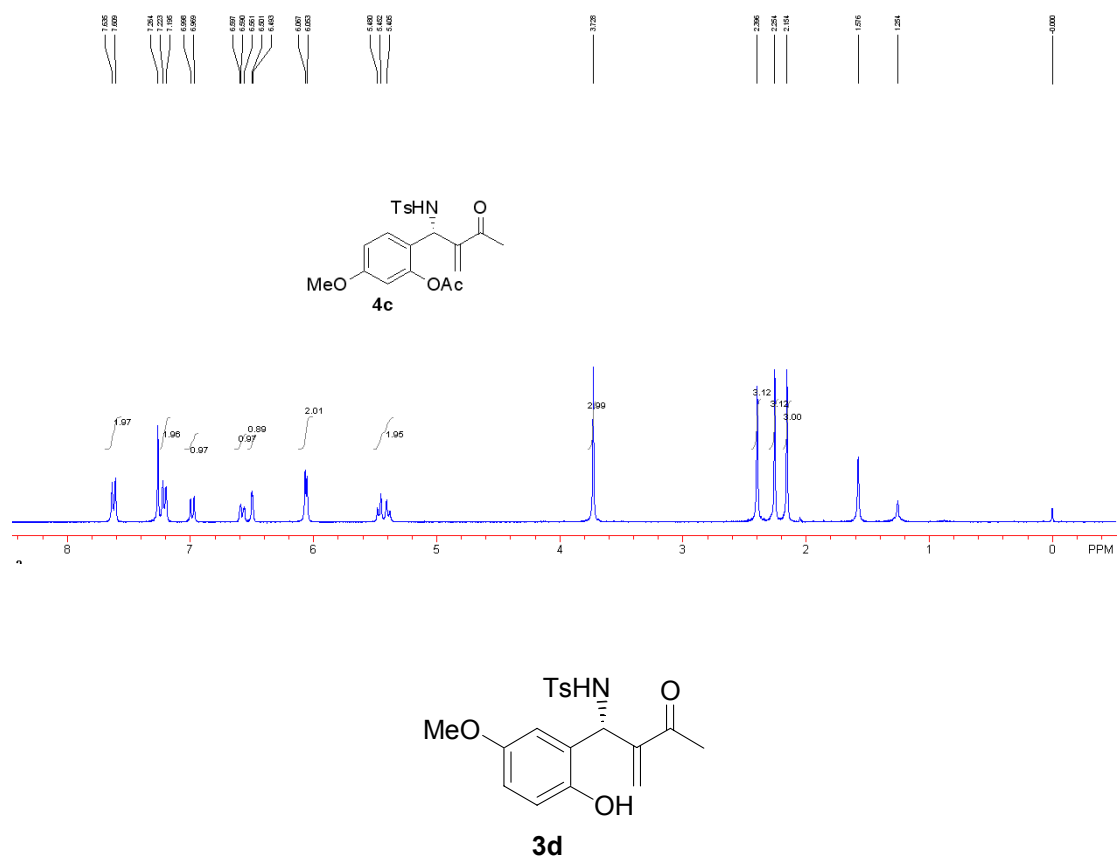

***N*-(1-(2-Hydroxy-5-methoxyphenyl)-2-methylene-3-oxobutyl)-4-methylbenzenesulfonami**

**de 3d:** White solid (cubes obtained by recrystallization from CH<sub>2</sub>Cl<sub>2</sub>/PE = 3/1): 95%; *ee* 99.9%; [α]<sub>D</sub><sup>20</sup> 98 (c 0.95, CHCl<sub>3</sub>), mp: 107-110 °C. IR (KBr) ν 3306, 1676, 1596, 1481, 1442, 1335, 1274, 1222, 1160, 1055 cm<sup>-1</sup>; <sup>1</sup>H NMR (CDCl<sub>3</sub>, TMS, 300 MHz) δ 2.20 (3H, s, Me), 2.34 (3H, s, Me), 3.81(3H, s, Me), 5.57 (1H, d, *J* = 9.7 Hz, CH), 5.82 (1H, s, OH), 6.01 (1H, d, *J* = 9.7 Hz, NH), 6.09 (1H, s, =CH), 6.17 (1H, s, =CH), 6.64-6.73 (3H, m, Ar), 7.12 (2H, d, *J* = 8.1 Hz, Ar), 7.60 (2H, d, *J* = 8.1 Hz, Ar); <sup>13</sup>C NMR (CDCl<sub>3</sub>, TMS, 75 MHz) δ 21.4, 26.3, 54.0, 55.9, 109.7, 119.5, 121.1, 124.0, 127.1, 127.2, 129.1, 137.3, 142.5, 142.8, 146.2, 146.2, 198.6. MS (EI) *m/e* 204 (M<sup>+</sup>-171, 54.4), 161 (M<sup>+</sup>-214, 100.0), 91 (M<sup>+</sup>-284, 26.9), 43 (M<sup>+</sup>-332, 44.5). HRMS (EI) calcd. for C<sub>19</sub>H<sub>21</sub>NO<sub>5</sub>S: 375.1140, Found: 375.1131.



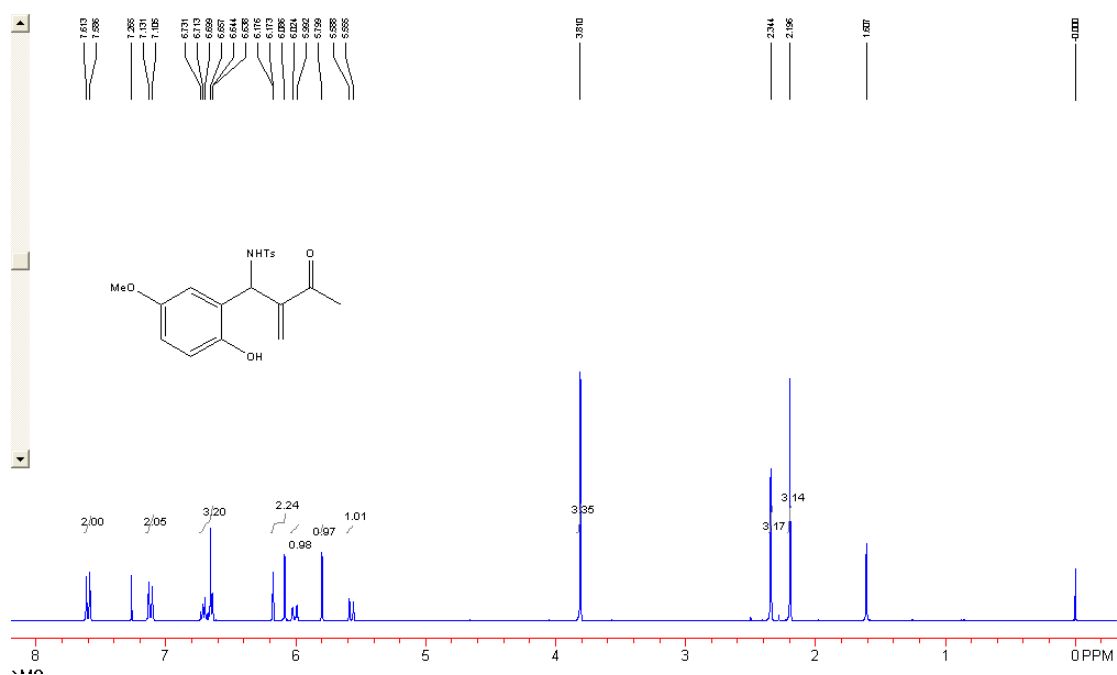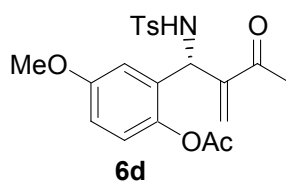

**Methoxy-2-(2-methylene-1-(4-methylphenylsulfonamido)-3-oxobutyl)phenyl acetate 6d:**

Yellow solid (needles obtained by recrystallization from  $\text{CH}_2\text{Cl}_2/\text{PE} = 6/1$ ): *ee* 99.9%;  $[\alpha]_{\text{D}}^{20}$  45 (c 1.0,  $\text{CHCl}_3$ ); mp.98-100 °C; IR (KBr)  $\nu$  3282, 2922, 1762, 1679, 1598, 1497, 1194, 1161, 1038  $\text{cm}^{-1}$ ;  $^1\text{H}$  NMR ( $\text{CDCl}_3$ , TMS, 300 MHz)  $\delta$  2.17 (3H, s, Me), 2.24 (3H, s, Me), 2.38 (3H, s, Me), 3.66 (3H, s, Me), 5.49 (1H, d,  $J = 8.6$  Hz, CH), 5.54 (1H, d,  $J = 8.6$  Hz, NH), 6.06 (1H, s, =CH), 6.08 (1H, s, =CH), 6.50 (1H, d,  $J = 2.7$  Hz, Ar), 6.71 (1H, dd,  $J = 2.7, 8.4$  Hz, Ar), 6.85 (1H, d,  $J = 8.4$  Hz, Ar), 7.19 (2H, d,  $J = 8.1$  Hz, Ar), 7.62 (2H, d,  $J = 8.1$  Hz, Ar); MS (ESI)  $m/e$  418 ( $\text{M}^+ + \text{H}$ ); HPLC: AD column;  $\lambda = 230$  nm; eluent: Hexane/Isopropanol = 70/30; Flow rate: 0.5 mL/min;  $t_{\text{major}} = 17.23$  min;  $t_{\text{minor}} = 13.00$  min; *ee*% = 99.9%.

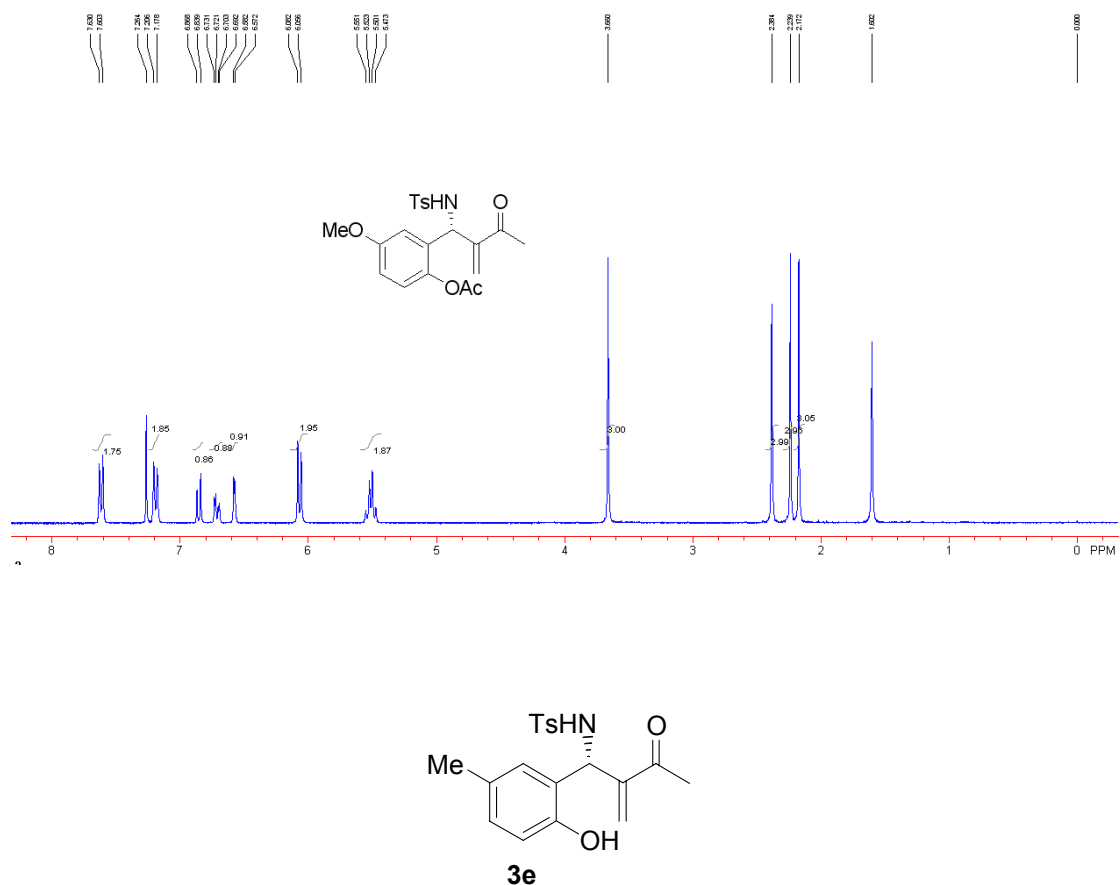

**N-[2-Acetyl-1-(2-hydroxy-5-methylphenyl)-allyl]-4-methylbenzenesulfonamide 3e:** White solid (cubes obtained by recrystallization from CH<sub>2</sub>Cl<sub>2</sub>/PE = 2/1): 96%; *ee* 92%; [ $\alpha$ ]<sub>D</sub><sup>20</sup> 94 (c 0.90, CHCl<sub>3</sub>); mp: 148-150 °C. IR (KBr)  $\nu$  3400, 3300, 2924, 2860, 1919, 1678, 1598, 1511, 1431, 1334, 1165, 1057 cm<sup>-1</sup>; <sup>1</sup>H NMR (CDCl<sub>3</sub>, TMS, 300 MHz)  $\delta$  2.07 (3H, s, Me), 2.20 (3H, s, Me), 2.33 (3H, s, Me), 5.50 (1H, d, *J* = 9.0 Hz, CH), 6.11 (1H, s, =CH), 6.19 (1H, s, =CH), 6.28 (1H, d, *J* = 9.0 Hz, NH), 6.57 (1H, d, *J* = 8.1 Hz, Ar), 6.69 (1H, d, *J* = 2.0 Hz, Ar), 6.76 (1H, dd, *J* = 2.0, 8.1 Hz, Ar), 7.06 (1H, s, OH), 7.10 (2H, d, *J* = 8.7 Hz, Ar), 7.62 (2H, d, *J* = 8.7 Hz, Ar); <sup>13</sup>C NMR (CDCl<sub>3</sub>, TMS, 75 MHz)  $\delta$  20.2, 21.3, 26.1, 53.4, 116.4, 124.1, 126.1, 127.0, 127.7, 128.9, 129.2, 129.5, 136.5, 143.2, 146.5, 150.9, 199.8. MS (MALDI) *m/e* 382 (M<sup>+</sup>+23, 100.0). HRMS (MALDI) calcd. for C<sub>19</sub>H<sub>21</sub>NO<sub>4</sub>SN<sup>+</sup>: 382.1083, found: 382.1098.

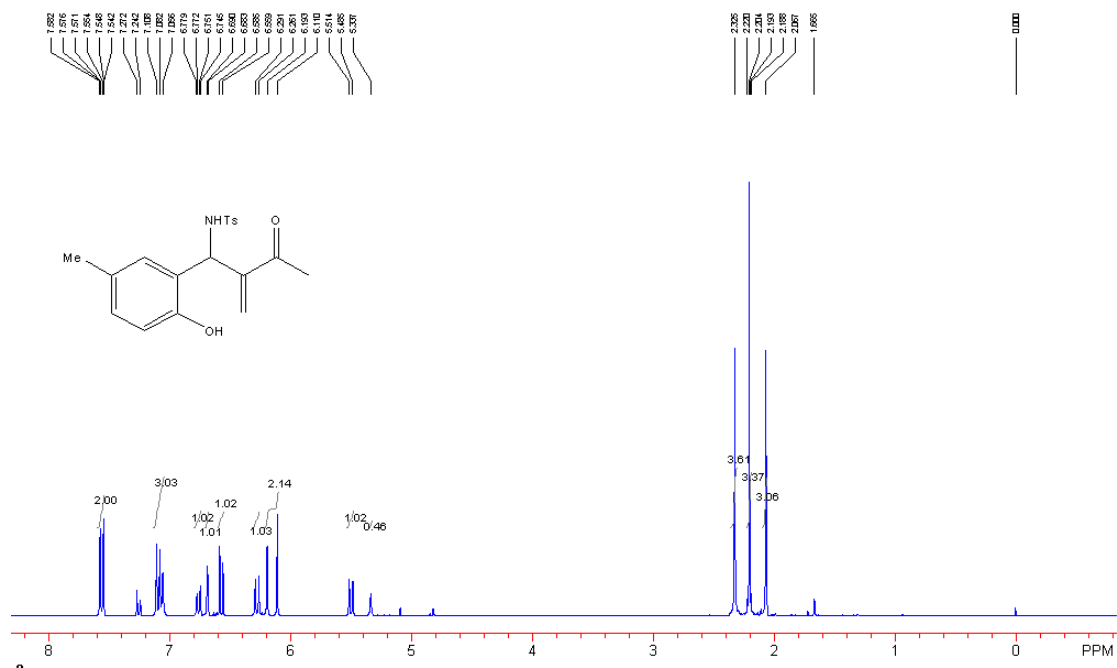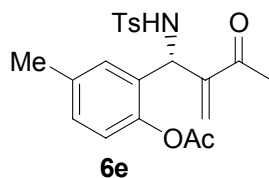

**4-Methyl-2-(2-methylene-1-(4-methylphenylsulfonamido)-3-oxobutyl)phenyl acetate 6e:**

White solid (cubes obtained by recrystallization from EtOAc/PE = 4/1): *ee* 92%;  $[\alpha]_D^{20}$  40 (c 0.73, CHCl<sub>3</sub>); mp. 147-149 °C; IR (KBr)  $\nu$  3282, 2924, 1854, 1917, 1763, 1679, 1598, 1497, 1194, 1161, 1061 cm<sup>-1</sup>; <sup>1</sup>H NMR (CDCl<sub>3</sub>, TMS, 300 MHz)  $\delta$  2.14 (3H, s, Me), 2.17 (3H, s, Me), 2.24 (3H, s, Me), 2.39 (3H, s, Me), 5.47 (1H, s, CH), 5.47 (1H, s, NH), 6.08 (1H, s, =CH), 6.10 (1H, s, =CH), 6.79-6.82 (2H, m, Ar), 6.97-7.02 (1H, m, Ar), 7.19 (2H, d, *J* = 8.6 Hz, Ar), 7.61 (2H, d, *J* = 8.6 Hz, Ar); MS (ESI) *m/e* 402 (M<sup>+</sup>+H); HPLC: OD column;  $\lambda$  = 230 nm; eluent: Hexane/Isopropanol = 70/30; Flow rate: 0.5 mL/min; *t*<sub>major</sub> = 14.63 min; *t*<sub>minor</sub> = 10.13 min; *ee*% = 92%.

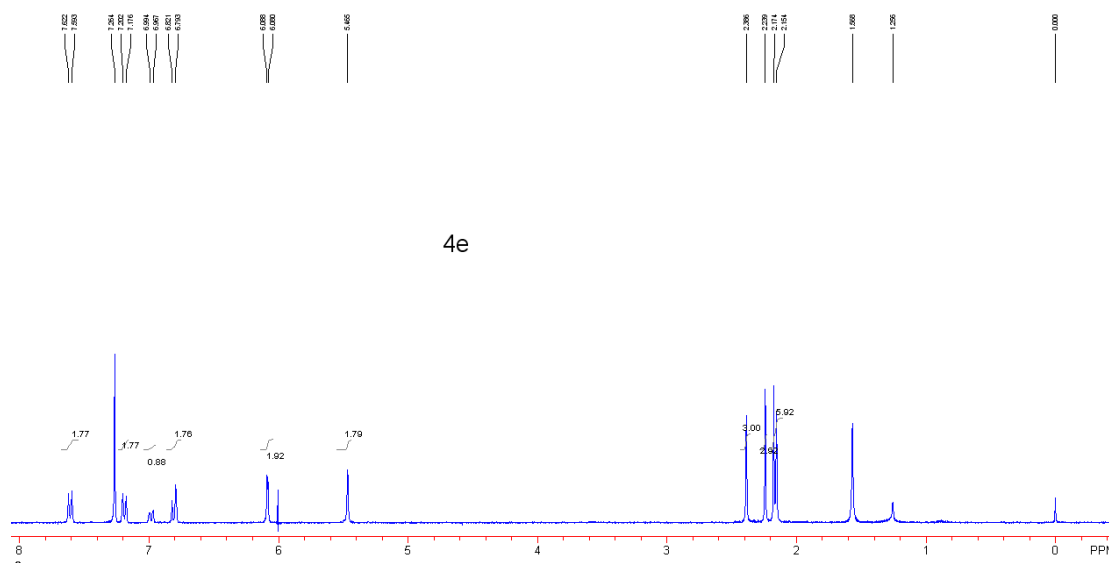

4e

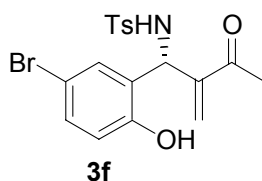

***N*-(1-(5-Bromo-2-hydroxyphenyl)-2-methylene-3-oxobutyl)-4-methylbenzenesulfonamide**

**3f**: White solid (cubes obtained by recrystallization from CH<sub>2</sub>Cl<sub>2</sub>/PE = 3/1): 95%; *ee* 90%; [α]<sub>D</sub><sup>20</sup> 70 (c 0.96, CHCl<sub>3</sub>); mp: 124-126 °C. IR (KBr) ν 3309, 2922, 1916, 1673, 1598, 1494, 1328, 1159 cm<sup>-1</sup>; <sup>1</sup>H NMR (CDCl<sub>3</sub>, TMS, 300 MHz) δ 2.17 (3H, s, Me), 2.30 (3H, s, Me), 5.40 (1H, d, *J* = 9.0 Hz, CH), 6.01 (1H, d, *J* = 9.0 Hz, NH), 6.10 (1H, s, =CH), 6.13 (1H, s, =CH), 6.52 (1H, d, *J* = 8.4 Hz, Ar), 6.89 (1H, d, *J* = 1.8 Hz, Ar), 7.02 (1H, dd, *J* = 1.8, 8.4 Hz, Ar), 7.07 (1H, s, OH), 7.13 (2H, d, *J* = 7.2 Hz, Ar), 7.71 (2H, d, *J* = 7.2 Hz, Ar); <sup>13</sup>C NMR (CDCl<sub>3</sub>, TMS, 75 MHz) δ 21.5, 26.2, 53.2, 112.6, 118.6, 126.6, 127.0, 128.5, 129.5, 131.0, 131.6, 136.1, 143.8, 145.8, 152.4, 199.8. MS (MALDI) *m/e* 446 (M<sup>+</sup>+23), 448 (M<sup>+</sup>+25, 100.0). HRMS (MALDI) calcd. for C<sub>18</sub>H<sub>18</sub>NO<sub>4</sub>SBrNa<sup>+</sup>: 446.0031, Found: 446.0032.

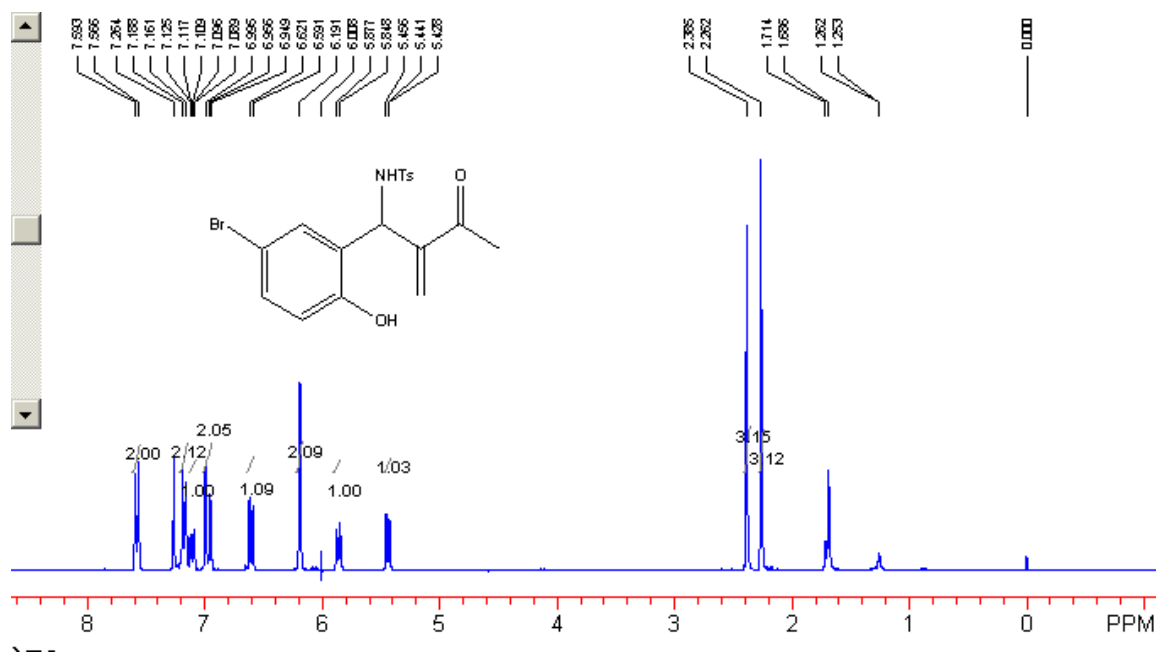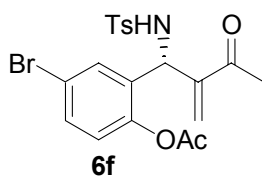

**4-Bromo-2-(2-methylene-1-(4-methylphenylsulfonamido)-3-oxobutyl)phenyl acetate 6f:**

White solid (cubes obtained by recrystallization from  $\text{CH}_2\text{Cl}_2/\text{PE} = 5/1$ ): *ee* 90%,  $[\alpha]_{\text{D}}^{20}$  70 (c 0.96,  $\text{CHCl}_3$ ), mp. 118-120 °C; IR (KBr)  $\nu$  3283, 2924, 1765, 1679, 1598, 1479, 1265, 1198, 1163, 1013  $\text{cm}^{-1}$ ;  $^1\text{H}$  NMR ( $\text{CDCl}_3$ , TMS, 300 MHz)  $\delta$  2.19 (3H, s, Me), 2.28 (3H, s, Me), 2.39 (3H, s, Me), 5.47 (1H, d,  $J = 8.0$  Hz, CH), 5.49 (1H, d,  $J = 8.0$  Hz, NH), 6.07 (1H, s, =CH), 6.12 (1H, s, =CH), 6.82 (1H, d,  $J = 8.7$  Hz, Ar), 7.09 (1H, d,  $J = 2.4$  Hz, Ar), 7.19 (2H, d,  $J = 8.1$  Hz, Ar), 7.28 (1H, dd,  $J = 2.4, 8.7$  Hz, Ar), 7.59 (2H, d,  $J = 8.1$  Hz, Ar). MS (ESI)  $m/e$  467 ( $\text{M}^+ + \text{H}$ ); HPLC: OD column;  $\lambda = 230$  nm; eluent: Hexane/Isopropanol = 80/20; Flow rate: 0.5 mL/min;  $t_{\text{major}} = 17.38$  min;  $t_{\text{minor}} = 14.46$  min; *ee*% = 90%.

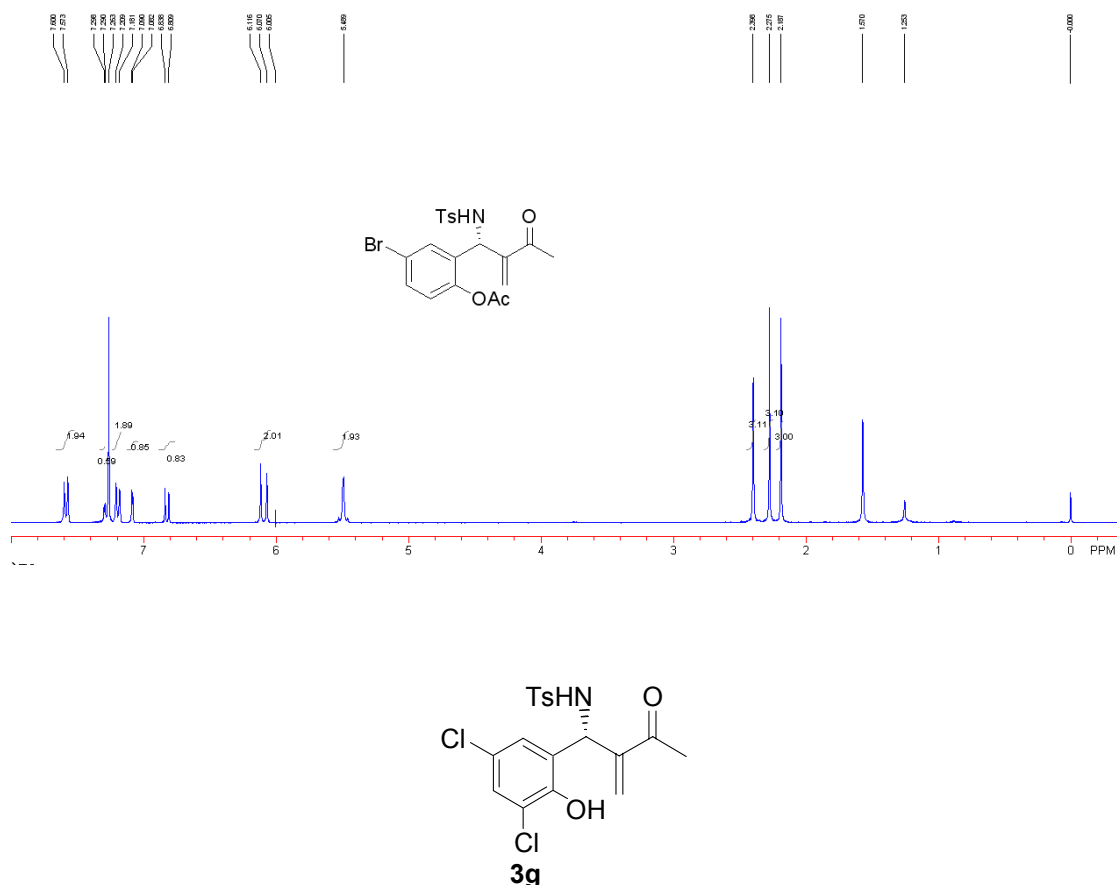

***N*-(1-(3,5-Dichloro-2-hydroxyphenyl)-2-methylene-3-oxobutyl)-4-methylbenzenesulfonamide **3g****

**3g**: White solid (plates obtained by recrystallization from CH<sub>2</sub>Cl<sub>2</sub>/PE = 5/1): 95%; *ee* 90%; [ $\alpha$ ]<sub>D</sub><sup>20</sup> 35 (c 0.47, CHCl<sub>3</sub>); mp: 169-170 °C. IR (KBr)  $\nu$  3273, 2924, 2853, 2101, 1712, 1674, 1598, 1557, 1495, 1332, 1161, 1093, 1068 cm<sup>-1</sup>; <sup>1</sup>H NMR (CDCl<sub>3</sub>, TMS, 300 MHz)  $\delta$  2.23 (3H, s, Me), 2.36 (3H, s, Me), 5.52 (1H, d, *J* = 9.6 Hz, CH), 6.11 (1H, d, *J* = 9.6 Hz, NH), 6.15 (1H, s, =CH), 6.16 (1H, s, =CH), 6.20 (1H, s, OH), 6.94 (1H, d, *J* = 2.4 Hz, Ar), 7.09 (1H, d, *J* = 2.4 Hz, Ar), 7.15 (2H, d, *J* = 8.4 Hz, Ar), 7.58 (2H, d, *J* = 8.4 Hz, Ar); <sup>13</sup>C NMR (CDCl<sub>3</sub>, TMS, 75 MHz)  $\delta$  21.3, 26.0, 63.8, 120.8, 125.2, 126.8, 127.1, 127.5, 127.7, 128.4, 129.1, 136.6, 143.4, 145.0, 146.9, 197.0. MS (EI) *m/e* 201 (M<sup>+</sup>-212, 21.2), 199 (M<sup>+</sup>-214, 35.5), 171 (M<sup>+</sup>-242, 25.0), 155 (M<sup>+</sup>-258, 28.9), 91 (M<sup>+</sup>-322, 100.0), 43 (M<sup>+</sup>-370, 86.7). HRMS (EI) calcd. for C<sub>18</sub>H<sub>17</sub>Cl<sub>2</sub>NO<sub>4</sub>S: 413.0255, Found: 413.0258.

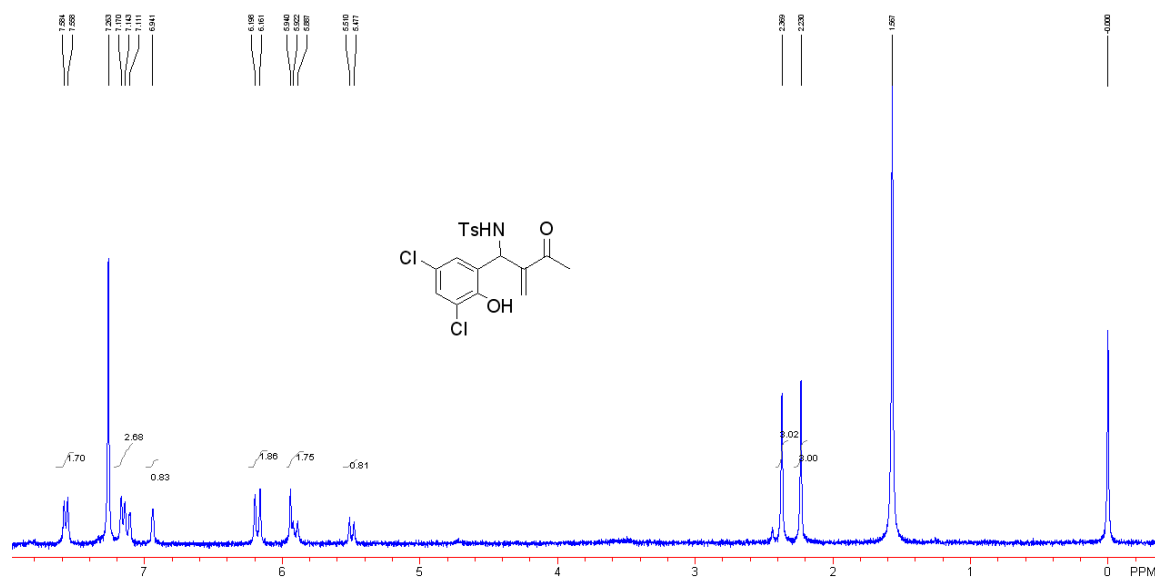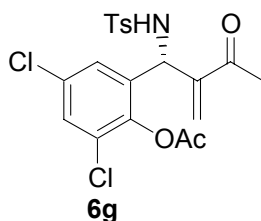

**2,4-Dichloro-6-(2-methylene-1-(4-methylphenylsulfonamido)-3-oxobutyl)phenyl acetate**

**6g**: White solid (cubes obtained by recrystallization from EtOAc/PE = 2/1); *ee* 90%;  $[\alpha]_D^{20}$  74 (c 0.70, CHCl<sub>3</sub>); mp. 165-166 °C; IR (KBr)  $\nu$  3281, 2924, 2853, 1772, 1681, 1573, 1453 cm<sup>-1</sup>; <sup>1</sup>H NMR (CDCl<sub>3</sub>, TMS, 300 MHz)  $\delta$  2.18 (3H, s, Me), 2.31 (3H, s, Me), 2.40 (3H, s, Me), 5.47 (1H, d, *J* = 9.0 Hz, CH), 5.84 (1H, d, *J* = 9.0 Hz, NH), 6.04 (1H, s, =CH), 6.11 (1H, s, =CH), 6.93 (1H, s, Ar), 7.20 (2H, d, *J* = 8.1 Hz, Ar), 7.23 (1H, d, *J* = 2.4 Hz, Ar), 7.59 (2H, d, *J* = 8.1 Hz, Ar); MS (EI) *m/e* 266 (M<sup>+</sup>-155, 6.00), 91 (M<sup>+</sup>-330, 46.38), 43 (M<sup>+</sup>-378, 100); HPLC: AD column;  $\lambda$  = 230 nm; eluent: Hexane/Isopropanol = 70/30; Flow rate: 0.6 mL/min; *t*<sub>major</sub> = 12.46 min; *t*<sub>minor</sub> = 15.54 min; *ee*% = 95%.

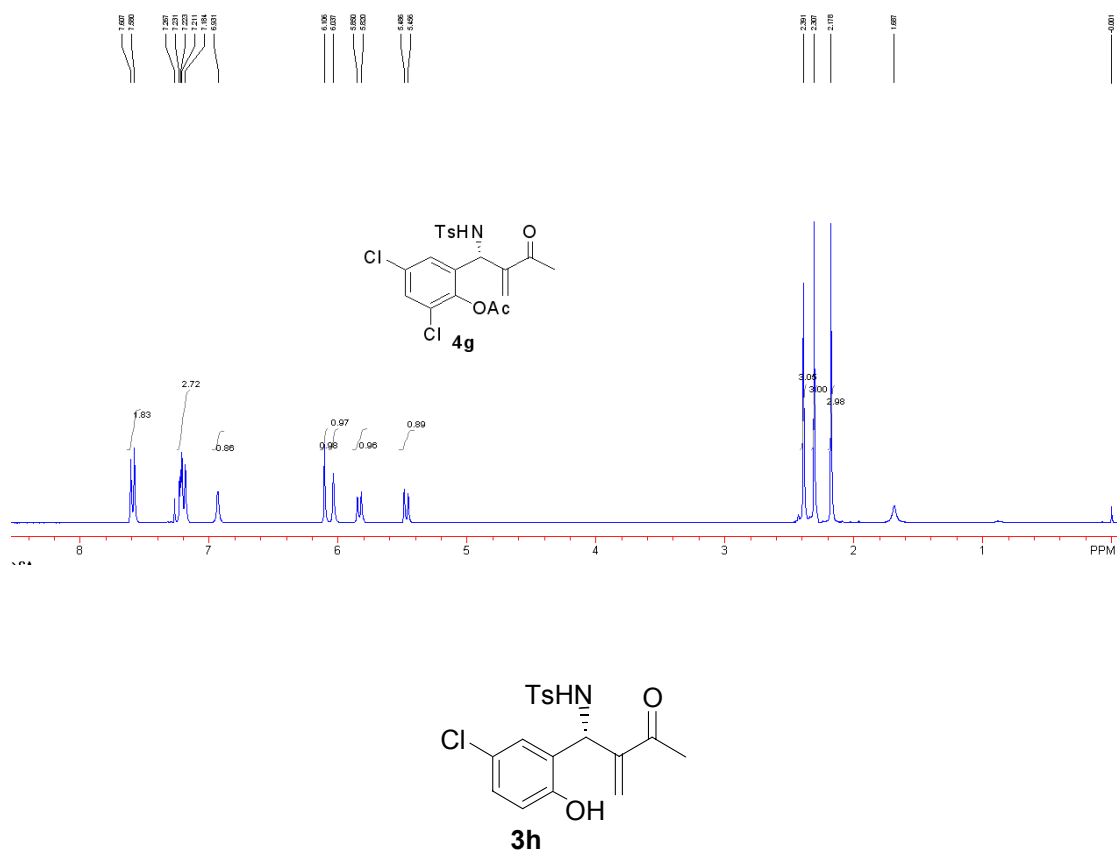

***N*-(1-(5-Chloro-2-hydroxyphenyl)-2-methylene-3-oxobutyl)-4-methylbenzenesulfonamide**

**3h**: White solid (needles obtained by recrystallization from CH<sub>2</sub>Cl<sub>2</sub>/PE = 4/1): 96% yield; *ee* 90%; [α]<sub>D</sub><sup>20</sup> 74 (c 0.70, CHCl<sub>3</sub>); mp: 124-126 °C. IR (KBr) ν 3281, 2923, 1709, 1486, 1332, 1161, 1093 cm<sup>-1</sup>; <sup>1</sup>H NMR (CDCl<sub>3</sub>, TMS, 300 MHz) δ 2.26 (3H, s, Me), 2.38 (3H, s, Me), 5.44 (1H, d, *J* = 8.4 Hz, CH), 5.85 (1H, d, *J* = 8.4 Hz, NH), 6.19 (1H, s, =CH), 6.20 (1H, s, =CH), 6.66 (1H, d, *J* = 8.1 Hz, Ar), 6.83 (1H, d, *J* = 2.4 Hz, Ar), 6.97 (1H, dd, *J* = 2.4, 8.1 Hz, Ar), 6.99 (1H, s, OH), 7.18 (2H, d, *J* = 8.1 Hz, Ar), 7.59 (2H, d, *J* = 8.1 Hz, Ar); <sup>13</sup>C NMR (CDCl<sub>3</sub>, TMS, 75 MHz) δ 21.5, 26.2, 53.2, 118.5, 125.5, 126.4, 127.1, 127.8, 128.6, 128.9, 129.5, 136.2, 143.8, 145.9, 151.9, 199.9. MS (MALDI) *m/e* 402 (M<sup>+</sup>+23, 100.0). HRMS (MALDI) calcd. for C<sub>18</sub>H<sub>18</sub>NO<sub>4</sub>SClNa<sup>+</sup>: 402.0533, Found: 402.0537.



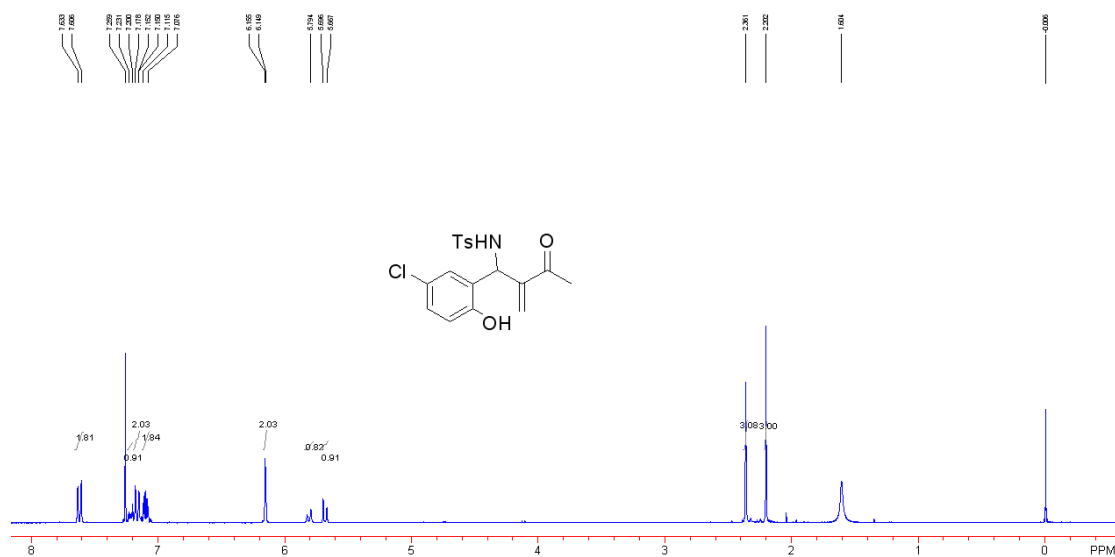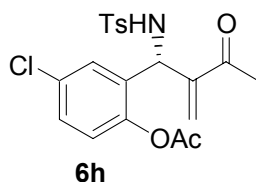

**4-Chloro-2-(2-methylene-1-(4-methylphenylsulfonamido)-3-oxobutyl)phenyl acetate 6h:**

White solid (plates obtained by recrystallization from EtOAc/PE = 3/1): *ee* 90%;  $[\alpha]_D^{20}$  74 (c 0.70, CHCl<sub>3</sub>); mp. 118-120 °C; IR (KBr)  $\nu$  3287, 2924, 1917, 1767, 1680, 1482, 1165 cm<sup>-1</sup>; <sup>1</sup>H NMR (CDCl<sub>3</sub>, TMS, 300 MHz)  $\delta$  2.15 (3H, s, Me), 2.22 (3H, s, Me), 2.53 (3H, s, Me), 5.50 (1H, d, *J* = 9.0 Hz, CH), 5.52 (1H, d, *J* = 9.0 Hz, NH), 6.04 (1H, s, =CH), 6.09 (1H, s, =CH), 6.88 (1H, d, *J* = 9.0 Hz, Ar), 6.96 (1H, d, *J* = 1.5 Hz, Ar), 7.14 (1H, dd, *J* = 9.0, 1.5 Hz, Ar), 7.19 (2H, d, *J* = 8.2 Hz, Ar), 7.59 (2H, d, *J* = 8.2 Hz, Ar). MS (EI) *m/e* 266 (*M*<sup>+</sup>-155, 6.00), 91 (*M*<sup>+</sup>-330, 46.38), 43 (*M*<sup>+</sup>-378, 100); HPLC: AD column;  $\lambda$  = 230 nm; eluent: Hexane/Isopropanol = 70/30; Flow rate: 0.5 mL/min; *t*<sub>major</sub> = 14.38 min; *t*<sub>minor</sub> = 17.54 min; *ee*% = 90%.

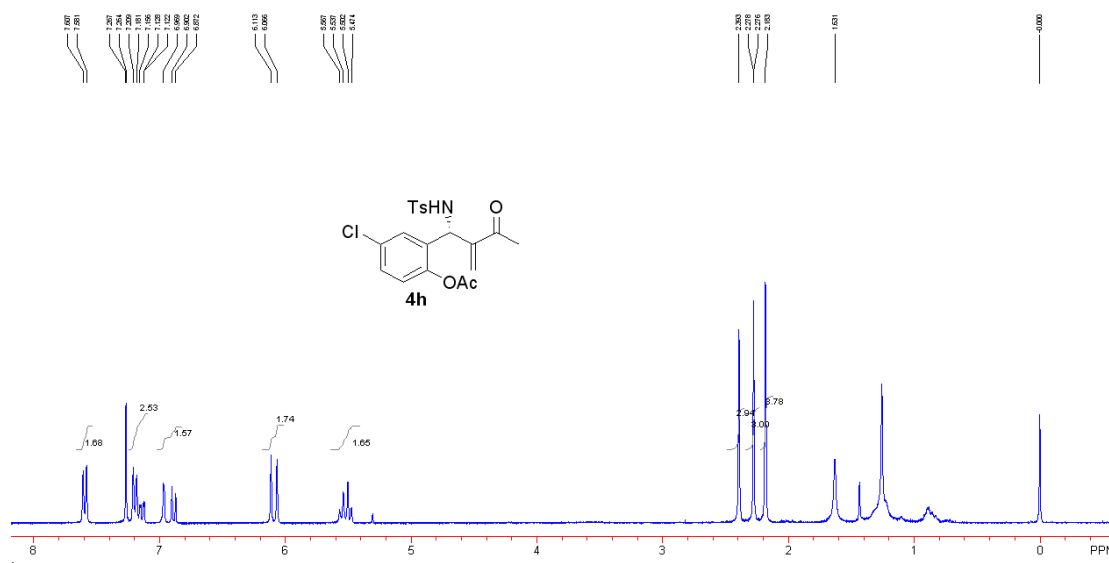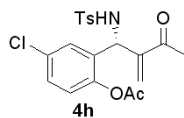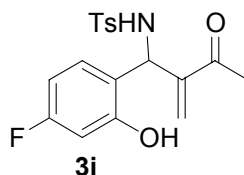

**N-(1-(4-fluoro-2-hydroxyphenyl)-2-methylene-3-oxobutyl)-4-methylbenzenesulfonamide**

**3i.** This is a new compound. White solid (needles obtained by recrystallization from EtOAc/PE = 2/1): Mp. 70-72 °C; *ee* 94%;  $[\alpha]_D^{20} = +59.2$  (CHCl<sub>3</sub>, 0.90); IR (CH<sub>2</sub>Cl<sub>2</sub>)  $\nu$  3286, 2925, 1673, 1613, 1517, 1434, 1328, 1158, 1093, 670 cm<sup>-1</sup>; <sup>1</sup>H NMR (CDCl<sub>3</sub>, 300 MHz, TMS):  $\delta$  2.22 (3H, s, CH<sub>3</sub>), 2.35 (3H, s, CH<sub>3</sub>), 5.51 (1H, d, *J* = 9.3 Hz, CH), 6.13 (1H, s, =CH), 6.17 (1H, s, =CH), 6.29 (1H, d, *J* = 9.3 Hz, NH), 6.33-6.42 (2H, m, Ar), 6.90 (1H, dd, *J*<sub>1</sub> = 6.6 Hz, *J*<sub>2</sub> = 8.4 Hz, Ar), 7.14 (2H, d, *J* = 7.8 Hz, Ar), 7.53 (1H, s, OH), 7.57 (2H, d, *J* = 8.1 Hz, Ar). <sup>13</sup>C NMR (CDCl<sub>3</sub>, 75 MHz):  $\delta$  21.4, 26.1, 52.9, 104.0 (d, *J* = 24.2 Hz), 107.2 (d, *J* = 20.6 Hz), 120.7 (d, *J* = 2.7 Hz), 126.2, 127.0, 128.1, 129.5 (d, *J* = 11.0 Hz), 136.3, 143.6, 146.1, 154.5 (d, *J* = 11.7 Hz), 162.7 (d, *J* = 244.9 Hz), 199.9. <sup>19</sup>F NMR (CDCl<sub>3</sub>, 282 MHz, CFCl<sub>3</sub>):  $\delta$  -113.12 (q, *J* = 9.6 Hz). MS (ESI) *m/z* 385.0, 346.0, 193.0. HRMS (MALDI) Calcd. for

$C_{18}H_{18}FNO_4S$  requires ( $M^+ + Na^+$ ) 386.0833, Found 386.0832.

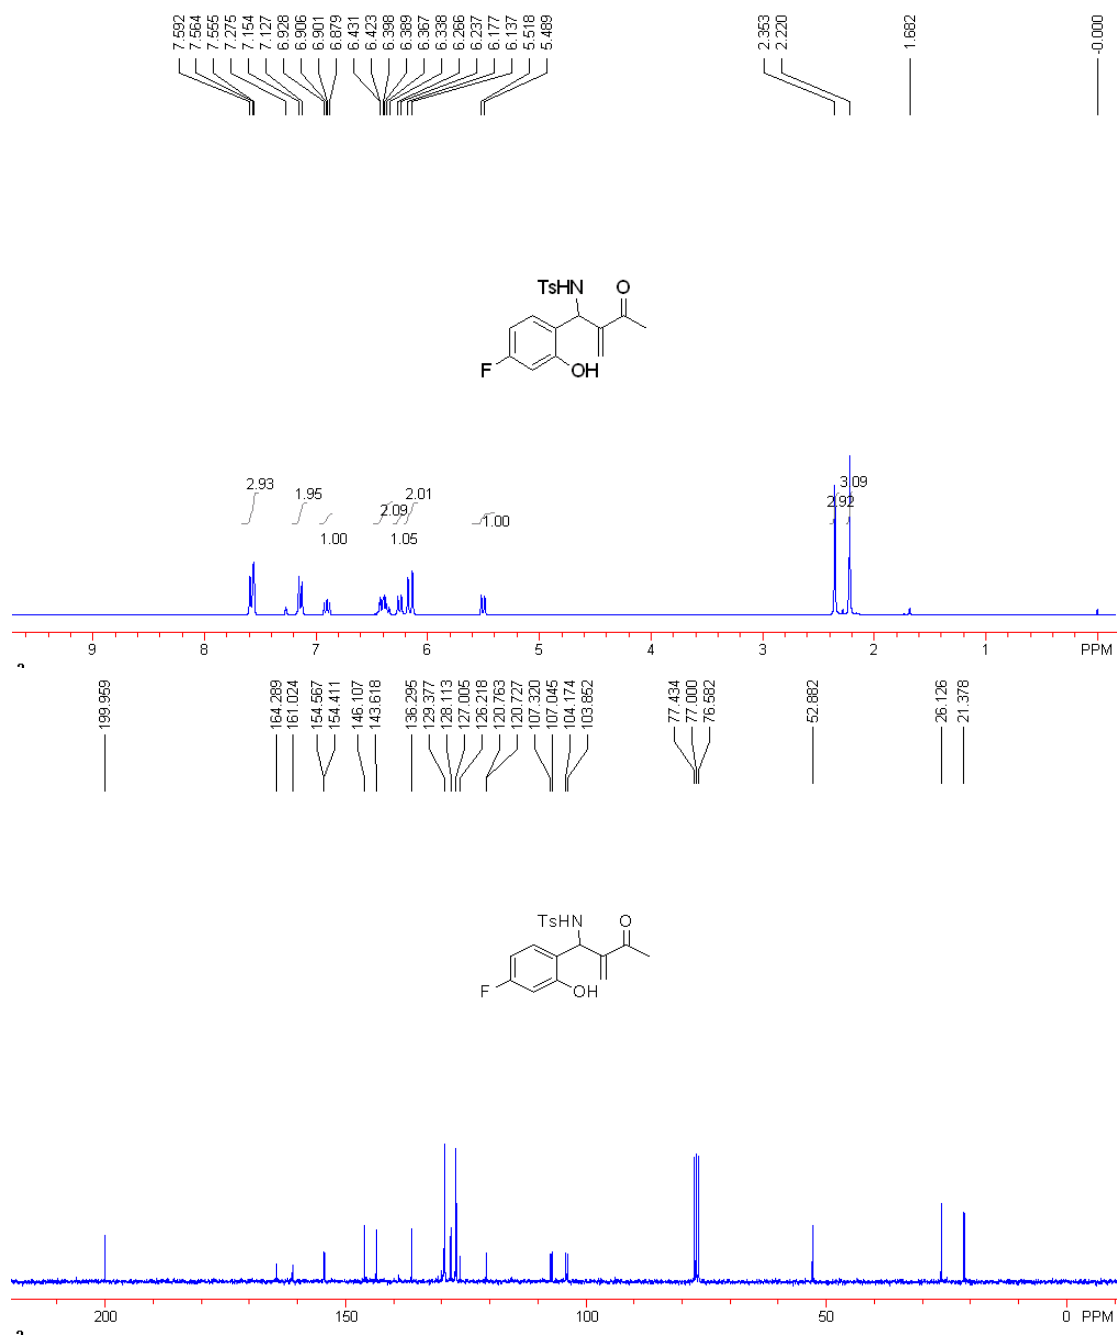

113.079  
113.113  
113.136  
113.167

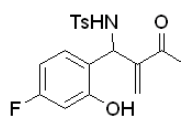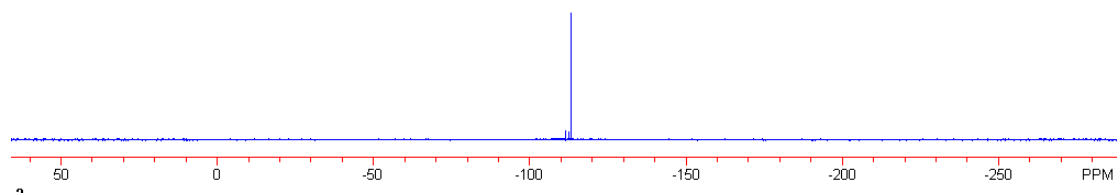

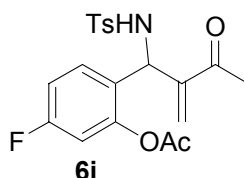

**5-fluoro-2-(2-methylene-1-(4-methylphenylsulfonamido)-3-oxobutyl)phenyl acetate 6i.**

This is a new compound. White solid (needles obtained by recrystallization from CH<sub>2</sub>Cl<sub>2</sub>/PE = 2/3): Mp. 110-112 °C; [ $\alpha$ ]<sub>D</sub><sup>20</sup> = +27.8 (CHCl<sub>3</sub>, 1.15); IR (CH<sub>2</sub>Cl<sub>2</sub>)  $\nu$  3284, 3080, 1771, 1680, 1500, 1197, 672 cm<sup>-1</sup>; <sup>1</sup>H NMR (CDCl<sub>3</sub>, 300 MHz, TMS):  $\delta$  2.14 (3H, s, CH<sub>3</sub>), 2.27 (3H, s, CH<sub>3</sub>), 2.39 (3H, s, CH<sub>3</sub>), 5.57 (1H, d,  $J$  = 8.7 Hz, CH), 5.89 (1H, d,  $J$  = 8.7 Hz, NH), 6.03 (1H, s, =CH), 6.07 (1H, s, =CH), 6.68-6.74 (2H, m, Ar), 7.09 (1H, dd,  $J_1$  = 6.3 Hz,  $J_2$  = 9.6 Hz, Ar), 7.18 (2H, d,  $J$  = 8.7 Hz, Ar), 7.59 (2H, d,  $J$  = 7.8 Hz, Ar). <sup>13</sup>C NMR (CDCl<sub>3</sub>, 75 MHz):  $\delta$  21.0, 21.4, 26.2, 52.5, 110.7 (d,  $J$  = 24.6 Hz), 112.9 (d,  $J$  = 21.2 Hz), 126.3, 126.5 (d,  $J$  = 3.3 Hz), 127.1, 129.4, 129.7 (d,  $J$  = 9.8 Hz), 137.1, 143.4, 146.4, 148.3 (d,  $J$  = 10.8 Hz), 161.8 (d,  $J$  = 247.1 Hz), 168.7, 198.3. <sup>19</sup>F NMR (CDCl<sub>3</sub>, 282 MHz, CFCl<sub>3</sub>):  $\delta$  -112.15 (q,  $J$  = 6.8 Hz). MS (ESI)  $m/z$  406.0, 235.0. HRMS (MALDI) Calcd. for C<sub>20</sub>H<sub>20</sub>FNO<sub>5</sub>S requires (M<sup>+</sup>+Na<sup>+</sup>) 428.0941, Found 428.0938. Enantiomeric excess was determined by HPLC with a Chiralcel AD-H column: hexane/*i*PrOH = 75/25, 0.7 mL/min, 254 nm,  $t_{major}$  = 9.48 min,  $t_{minor}$  = 14.83 min; 94% *ee*.

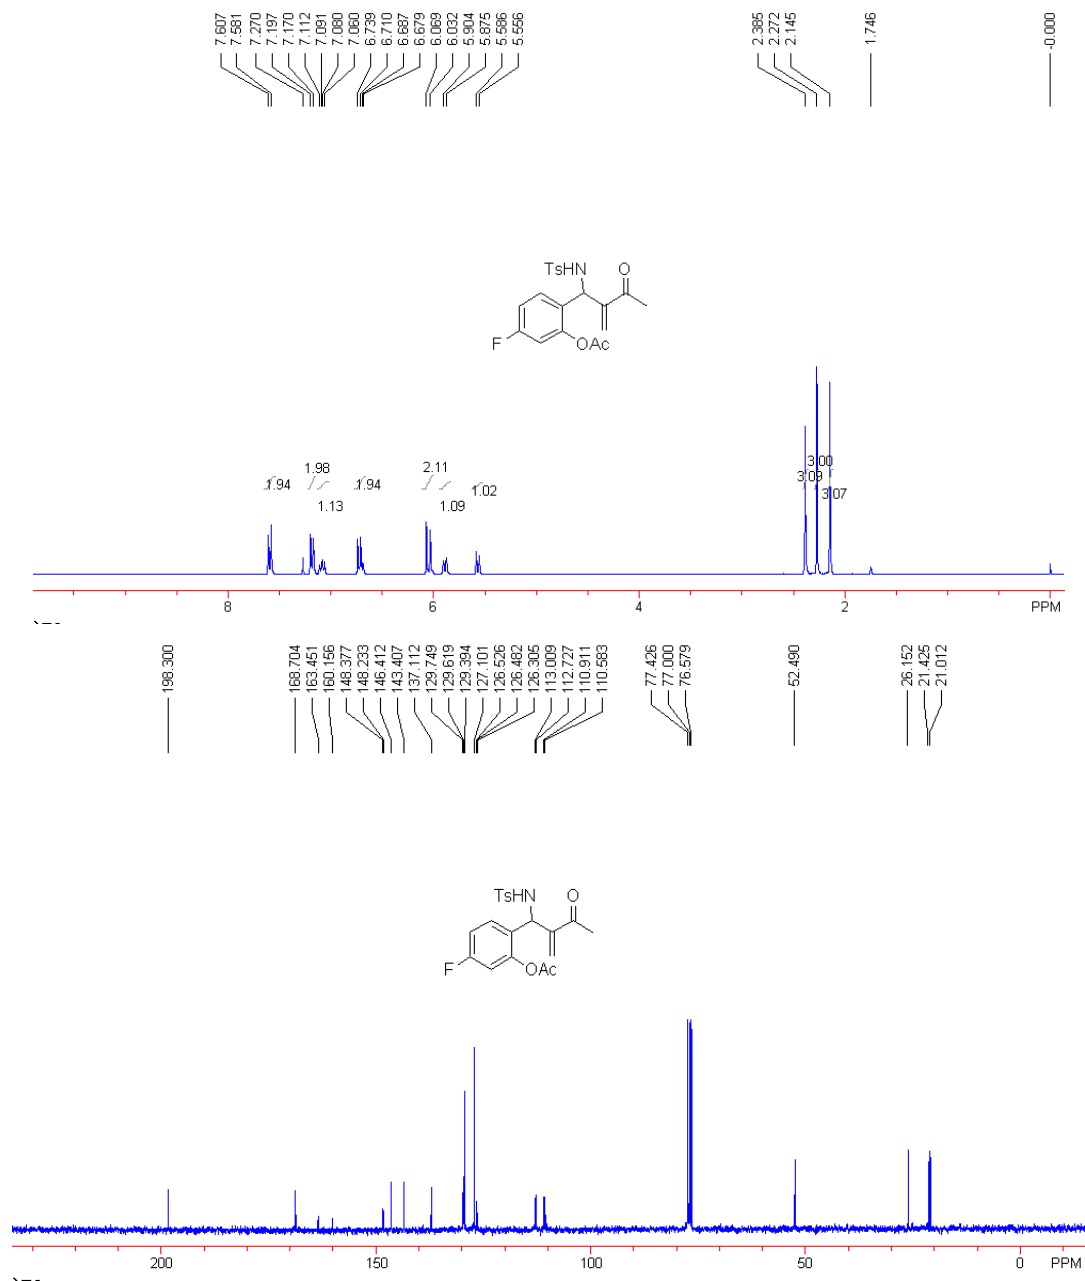

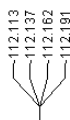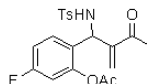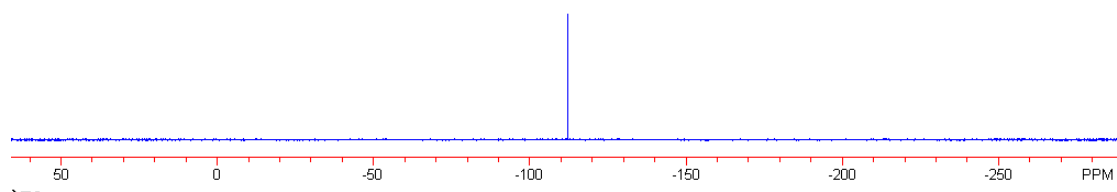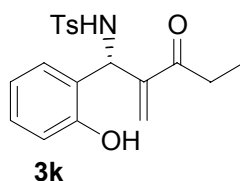

***N*-(1-(2-Hydroxyphenyl)-2-methylene-3-oxopentyl)-4-methylbenzenesulfonamid **3k**:**

White solid (cubes obtained by recrystallization from CH<sub>2</sub>Cl<sub>2</sub>/PE = 3/1), yield: 99%; *ee* 92%; [α]<sub>D</sub><sup>20</sup> 80 (c 0.50, CHCl<sub>3</sub>); mp: 48-50 °C. IR (KBr) ν 3301, 2979, 2939, 2879, 1919, 1676, 1598, 1458, 1414, 1332, 1158, 1093, 950 cm<sup>-1</sup>; <sup>1</sup>H NMR (CDCl<sub>3</sub>, TMS, 300 MHz) δ 0.98 (3H, t, *J* = 7.2 Hz, Me), 2.36 (3H, s, Me), 2.49-2.72 (2H, m, CH<sub>2</sub>), 5.51 (1H, d, *J* = 8.3 Hz, CH), 5.90 (1H, d, *J* = 8.3 Hz, NH), 6.15 (2H, d, *J* = 4.2 Hz, =CH<sub>2</sub>), 6.71-6.76 (1H, m, Ar), 6.87 (1H, s, OH), 6.94 (1H, dd, *J* = 8.1, 1.5 Hz, Ar), 7.02-7.09 (1H, m, Ar), 7.16 (2H, d, *J* = 8.7 Hz, Ar), 7.60 (2H, d, *J* = 8.7 Hz, Ar); <sup>13</sup>C NMR (CDCl<sub>3</sub>, TMS, 75 MHz) δ 7.9, 21.4, 31.1, 55.5, 112.9, 114.4, 117.9, 125.8, 126.3, 127.0, 129.3, 129.6, 136.5, 143.4, 146.9, 153.4, 202.5; MS (EI) *m/e* 204 (M<sup>+</sup>-155, 42.8), 148 (M<sup>+</sup>-211, 66.0), 146 (M<sup>+</sup>-213, 20.0), 131 (M<sup>+</sup>-228, 43.4), 91

( $M^+$ -268, 100.0), 65 ( $M^+$ -294, 30.2), 57 ( $M^+$ -302, 81.2), 55 ( $M^+$ -304, 16.3). Anal. Calcd. for  $C_{19}H_{21}NO_4S$  requires C, 63.49; H, 5.89; N, 3.90%. Found: C, 63.53; H, 5.89; N, 3.74%.

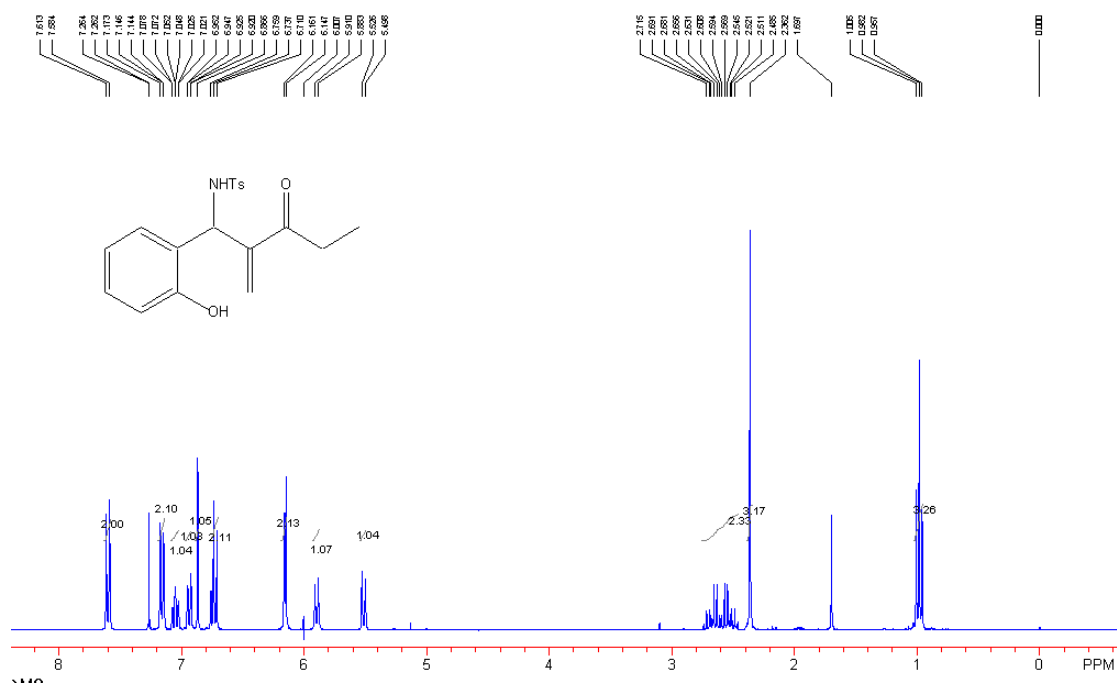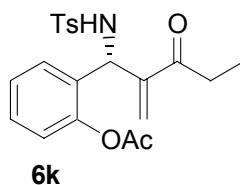

**2-(2-Methylene-1-(4-methylphenylsulfonamido)-3-oxopentyl)phenyl acetate 6k:** Colorless solid (plates obtained by recrystallization from  $CH_2Cl_2/PE = 4/1$ ): *ee* 92%;  $[\alpha]_D^{20}$  27 (c 0.53,  $CHCl_3$ ); mp. 70-72 °C; IR (KBr)  $\nu$  3283, 2977, 2926, 2854, 1766, 1681, 1598, 1489, 1370, 1336, 1201, 1094  $cm^{-1}$ ;  $^1H$  NMR ( $CDCl_3$ , TMS, 300 MHz)  $\delta$  0.93 (3H, t,  $J = 7.2$  Hz, Me), 2.27 (3H, s, Me), 2.38 (3H, s, Me), 2.42-2.61 (2H, m,  $CH_2$ ), 5.50 (1H, d,  $J = 8.0$  Hz, CH), 5.60 (1H, d,  $J = 8.0$  Hz, NH), 5.98 (1H, s, =CH), 6.06 (1H, s, =CH), 6.95 (1H, d,  $J = 8.4$  Hz, Ar), 7.03 (1H, t,  $J = 7.5$  Hz, Ar), 7.12 (1H, dd,  $J = 1.5, 7.8$  Hz, Ar), 7.17-7.20 (1H, m, Ar), 7.18 (2H, d,  $J = 8.1$  Hz, Ar), 7.61 (2H, d,  $J = 8.1$  Hz, Ar). MS (EI)  $m/e$  246 ( $M^+$ -155, 24.80), 91



(M<sup>+</sup>-310, 100), 43 (M<sup>+</sup>-358, 95.29); HPLC: AD column;  $\lambda$  = 230 nm; eluent: Hexane/Isopropanol = 90/10; Flow rate: 0.5 mL/min;  $t_{\text{major}}$  = 39.54 min;  $t_{\text{minor}}$  = 60.96 min;  $ee\%$  = 92%.

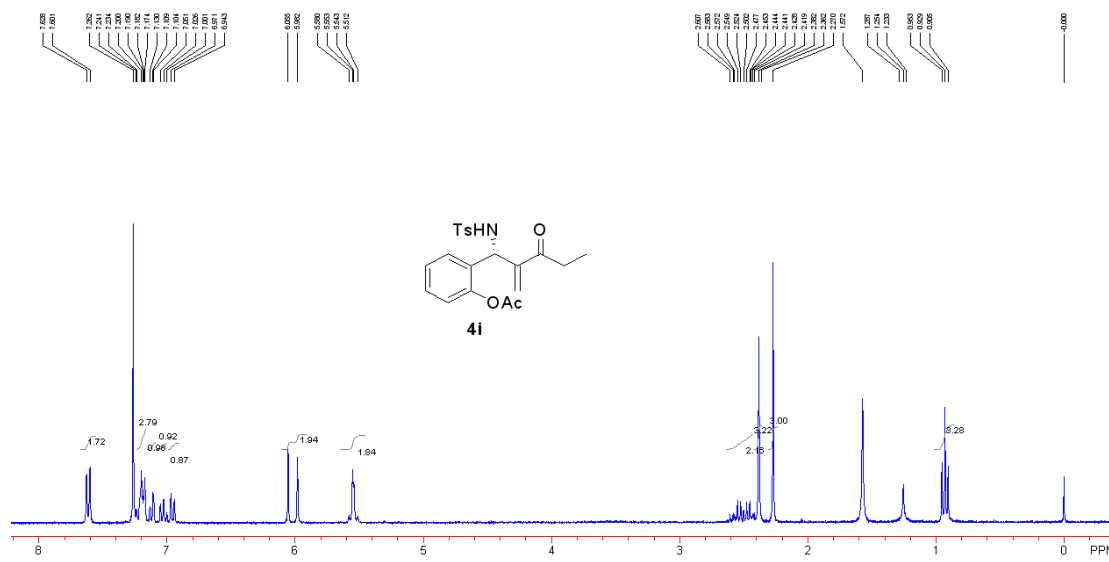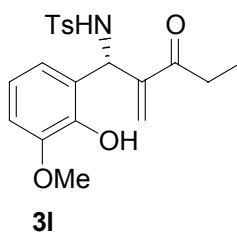

***N*-(1-(2-Hydroxy-3-methoxyphenyl)-2-methylene-3-oxopentyl)-4-methylbenzenesulfonamide 3I**: White solid (needles obtained by recrystallization from CH<sub>2</sub>Cl<sub>2</sub>/PE = 5/1), yield: 96%;  $ee$  94%;  $[\alpha]_D^{20}$  55 (c 1.21, CHCl<sub>3</sub>); mp: 95-97 °C. IR (KBr)  $\nu$  3355, 3268, 2977, 2939, 2843, 1918, 1679, 1597, 1482, 1443, 1158, 1093, 955, 904, 815, 670 cm<sup>-1</sup>; <sup>1</sup>H NMR (CDCl<sub>3</sub>, TMS, 300 MHz)  $\delta$  0.87 (3H, t,  $J$  = 7.4 Hz, Me), 2.51 (3H, s, Me), 2.33-2.56 (2H, m, CH<sub>2</sub>), 3.70 (1H, s, CH<sub>3</sub>), 5.53 (1H, d,  $J$  = 9.6 Hz, CH), 5.85 (1H, s, OH), 5.98-6.06 (3H, m, NH and =CH<sub>2</sub>), 6.54-6.64 (3H, m, Ar), 7.02 (2H, d,  $J$  = 8.3 Hz, Ar), 7.51 (2H, d,  $J$  = 8.3 Hz, Ar); <sup>13</sup>C NMR (CDCl<sub>3</sub>, TMS, 75 MHz)  $\delta$  7.8, 21.3, 31.2, 54.1, 55.9, 109.6, 119.4, 120.9, 124.0, 125.6, 127.0,

129.0, 137.2, 142.4, 142.8, 145.7, 146.2, 201.3; MS (EI)  $m/e$  171 ( $M^+$ -218, 17.3), 155 ( $M^+$ -234, 20.9), 108 ( $M^+$ -281, 13.1), 107 ( $M^+$ -282, 25.7), 91 ( $M^+$ -298, 100.0), 89 ( $M^+$ -300, 11.2), 65 ( $M^+$ -324, 34.4), 63 ( $M^+$ -326, 12.4). Anal. Calcd. for  $C_{20}H_{23}NO_5S$  requires C, 61.68; H, 5.95; N, 3.60%. Found: C, 61.46; H, 5.65; N, 3.22%.

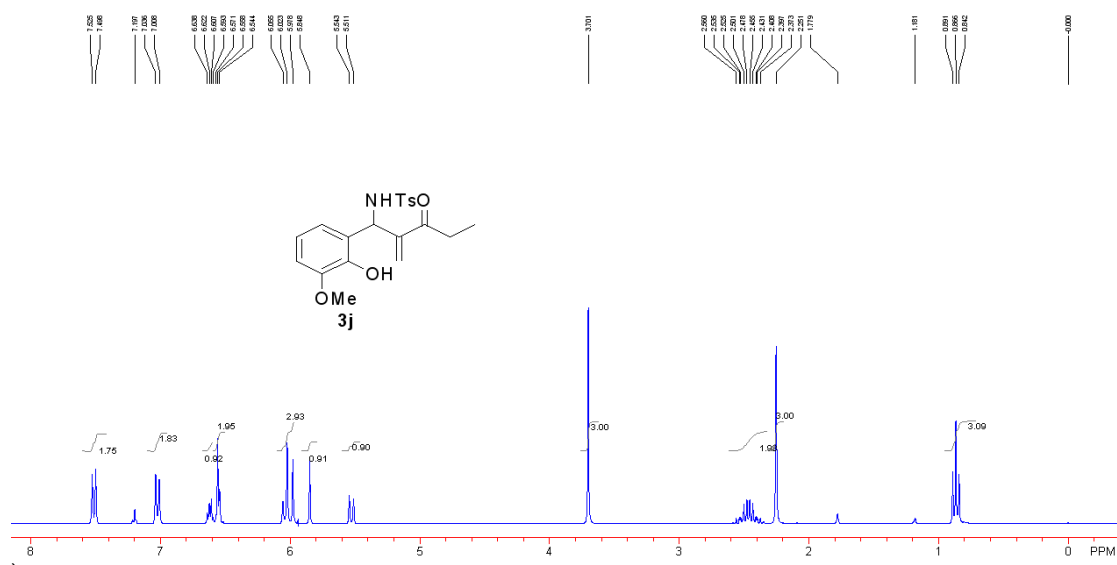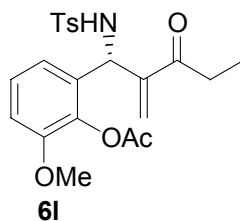

**2-Methoxy-6-(2-methylene-1-(4-methylphenylsulfonamido)-3-oxopentyl)phenyl acetate 6l:**

White solid (cubes obtained by recrystallization from  $CH_2Cl_2/PE = 3/1$ ):  $ee$  94%,  $[\alpha]_D^{20}$  32 (c 0.80,  $CHCl_3$ ), mp. 115-117 °C; IR (KBr)  $\nu$  3282, 2920, 1768, 1682, 1481, 1334, 1278, 1161, 1091, 1053  $cm^{-1}$ ;  $^1H$  NMR ( $CDCl_3$ , TMS, 300 MHz)  $\delta$  0.93 (3H, t,  $J = 7.2$  Hz, Me), 2.25 (3H, s, Me), 2.34 (3H, s, Me), 2.38-2.59 (2H, m,  $CH_2$ ), 3.76 (3H, s, Me), 5.49 (1H, s, CH), 5.49 (1H, s, NH), 5.99 (1H, s, =CH), 6.05 (1H, s, =CH), 6.71 (1H, d,  $J = 8.1$  Hz, Ar), 6.80 (1H, d,  $J = 8.1$  Hz, Ar), 6.99 (1H, t,  $J = 7.8$  Hz, Ar), 7.23 (2H, d,  $J = 8.1$  Hz, Ar), 7.62 (2H, d,  $J = 8.1$

Hz, Ar). MS (ESI)  $m/e$  432 ( $M^+ + 1$ ); HPLC: AD column;  $\lambda = 230$  nm; eluent: Hexane/Isopropanol = 80/20; Flow rate: 0.6 mL/min;  $t_{\text{major}} = 12.75$  min;  $t_{\text{minor}} = 20.49$  min;  $ee\% = 94\%$ .

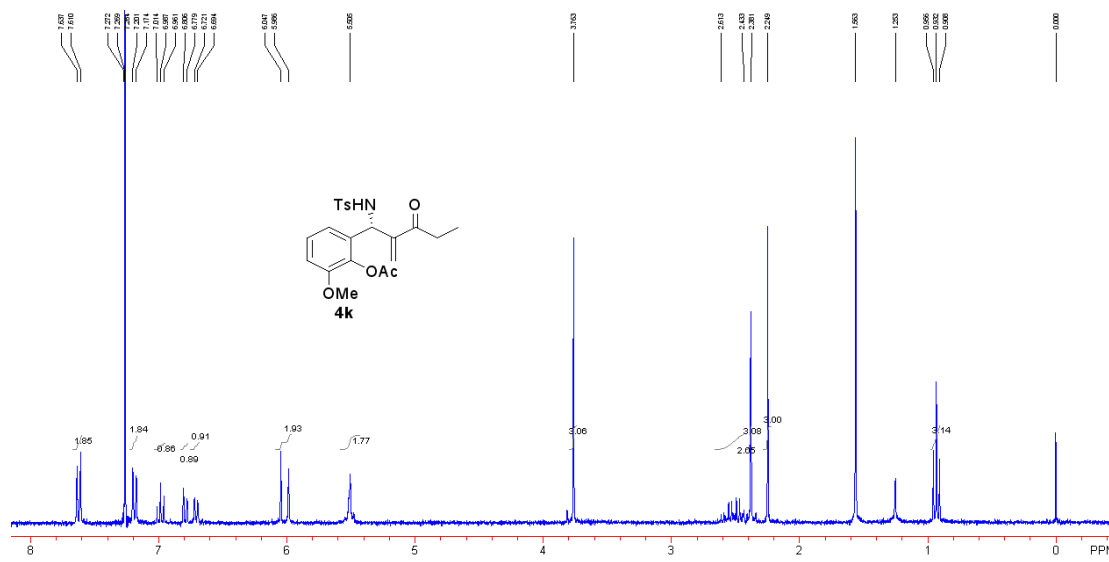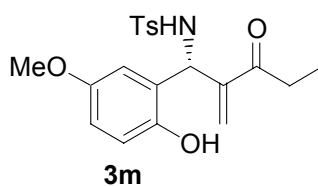

***N*-(1-(2-Hydroxy-5-methoxyphenyl)-2-methylene-3-oxopentyl)-4-methylbenzenesulfonamide 3m**: White solid (plates obtained by recrystallization from  $\text{CH}_2\text{Cl}_2/\text{PE} = 5/1$ ); yield: 97%,  $ee$  94%,  $[\alpha]_D^{20}$  73 (c 1.23,  $\text{CHCl}_3$ ), mp: 90-92 °C. IR (KBr)  $\nu$  3357, 3272, 2977, 2986, 2785, 1901, 1711, 1597, 1482, 1443, 1158, 1093  $\text{cm}^{-1}$ ;  $^1\text{H}$  NMR ( $\text{CDCl}_3$ , TMS, 300 MHz)  $\delta$  1.00 (3H, t,  $J = 7.5$  Hz, Me), 2.37 (3H, s, Me), 2.50-2.74 (2H, m,  $\text{CH}_2$ ), 3.65 (1H, s,  $\text{CH}_3$ ), 5.47 (1H, d,  $J = 8.4$  Hz, CH), 5.79 (1H, d,  $J = 8.4$  Hz, NH), 6.19 (2H, d,  $J = 9.0$  Hz,  $=\text{CH}_2$ ), 6.45 (1H, d,  $J = 2.7$  Hz, Ar), 6.49 (1H, s, OH), 6.01 (1H, dd,  $J = 8.7, 2.6$  Hz, Ar), 6.68 (1H, d,  $J = 8.7$  Hz, Ar), 7.15-7.18 (2H, m, Ar), 7.59-7.63 (2H, m, Ar);  $^{13}\text{C}$  NMR ( $\text{CDCl}_3$ , TMS, 75 MHz)  $\delta$  7.9,

21.4, 31.1, 53.2, 55.5, 112.9, 114.0, 117.9, 125.8, 126.3, 127.0, 129.3, 129.6, 136.5, 143.4, 146.9, 153.3, 202.5; MS (EI)  $m/e$  218 ( $M^+$ -171, 57.74), 203 ( $M^+$ -186, 25.7), 189 ( $M^+$ -200, 31.1), 178 ( $M^+$ -211, 19.1), 161 ( $M^+$ -228, 69.8), 91 ( $M^+$ -298, 100.0), 65 ( $M^+$ -324, 44.3), 57 ( $M^+$ -332, 60.8). Anal. Calcd. for  $C_{20}H_{23}NO_5S$  requires C, 61.68; H, 5.95; N, 3.60%. Found: C, 61.60; H, 5.79; N, 3.18%.

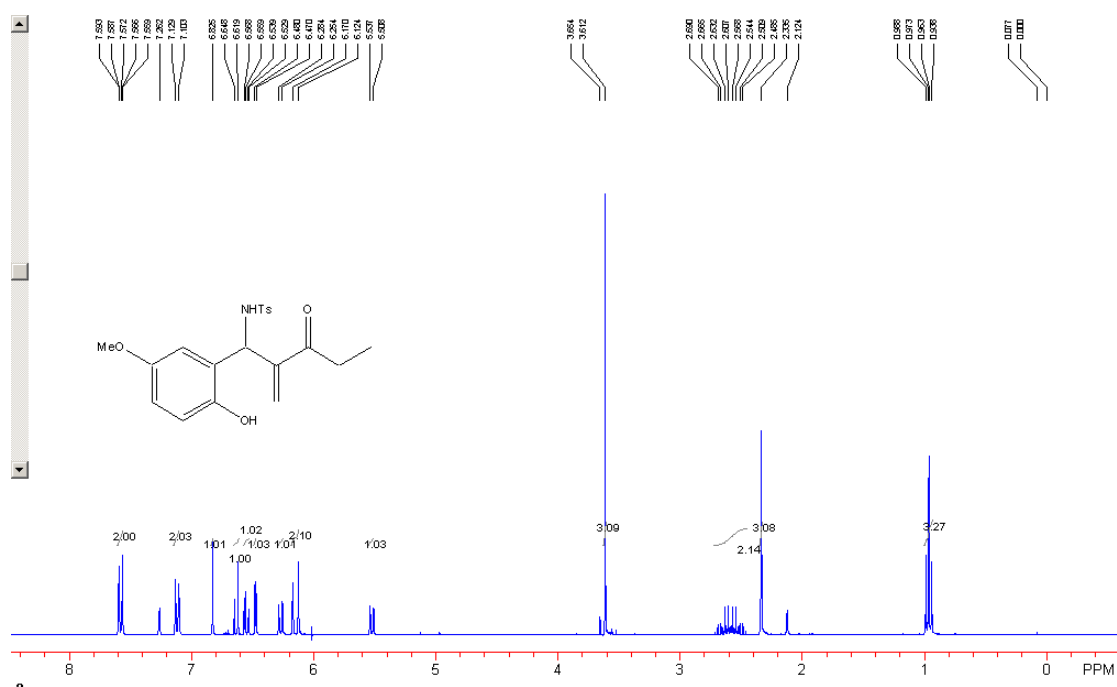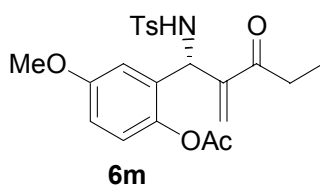

**4-Methoxy-2-(2-methylene-1-(4-methylphenylsulfonamido)-3-oxopentyl)phenyl acetate**

**6m**: White solid (needles obtained by recrystallization from  $CH_2Cl_2/PE = 3/1$ ):  $ee$  95%;  $[\alpha]_D^{20}$  21 (c 0.53,  $CHCl_3$ ); mp. 98-100 °C; IR (KBr)  $\nu$  3273, 2925, 1762, 1681, 1497  $cm^{-1}$ ;  $^1H$  NMR ( $CDCl_3$ , TMS, 300 MHz)  $\delta$  0.95 (3H, t,  $J = 7.5$  Hz, Me), 2.24 (3H, s, Me), 2.38 (3H, s, Me), 2.42-2.62 (2H, m,  $CH_2$ ), 3.67 (1H, s, Me), 5.50 (1H, d,  $J = 8.4$  Hz, CH), 5.57 (1H, d,  $J = 8.4$

Hz, NH), 5.99 (1H, s, =CH), 6.06 (1H, s, =CH), 6.58 (1H, d,  $J = 3.0$  Hz, Ar), 6.71 (1H, dd,  $J = 7.5, 3.0$  Hz, Ar), 6.86 (1H, d,  $J = 8.7$  Hz, Ar), 7.19 (2H, d,  $J = 8.1$  Hz, Ar), 7.61 (2H, d,  $J = 8.1$  Hz, Ar). MS (ESI)  $m/e$  449 ( $M^+ + 18$ ), 432 ( $M^+ + 1$ ). HPLC: OD column;  $\lambda = 230$  nm; eluent: Hexane/Isopropanol = 80/20; Flow rate: 0.6 mL/min;  $t_{\text{major}} = 22.29$  min;  $t_{\text{minor}} = 20.71$  min;  $ee\% = 95\%$ .

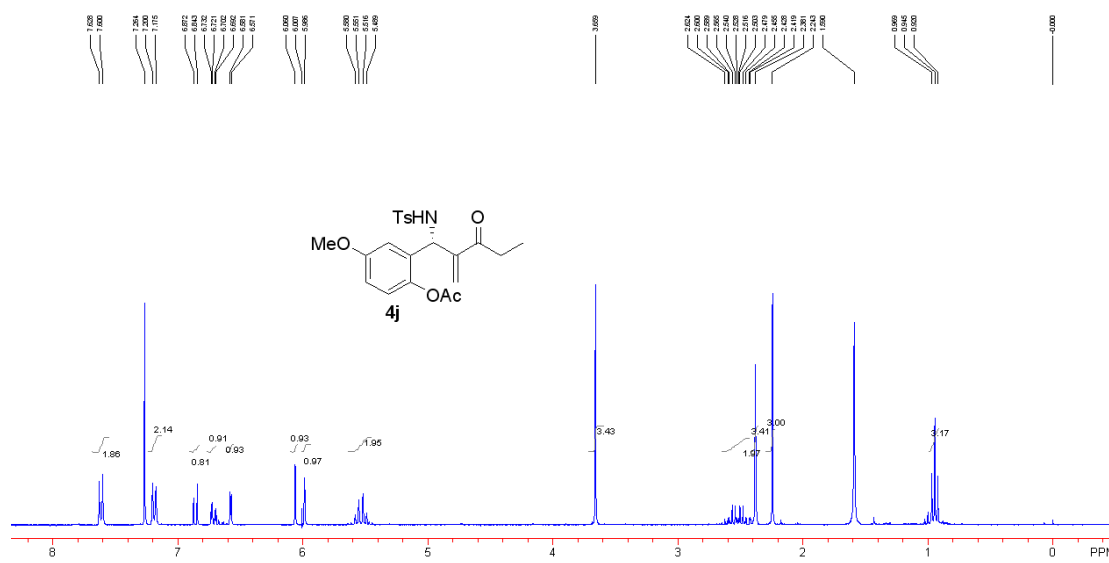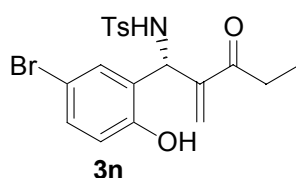

***N*-(1-(5-Bromo-2-hydroxyphenyl)-2-methylene-3-oxopentyl)-4-methylbenzenesulfonamide**

**3n**: Yellow solid (plates obtained by recrystallization from  $\text{CH}_2\text{Cl}_2/\text{PE} = 4/1$ ); yield: 95%;  $ee$  92%;  $[\alpha]_{\text{D}}^{20}$  54 (c 1.00,  $\text{CHCl}_3$ ); mp: 66-68 °C. IR (KBr)  $\nu$  3277, 2983, 1938, 1676, 1598, 1493, 1416, 1331, 1159, 1093, 813, 670  $\text{cm}^{-1}$ ;  $^1\text{H}$  NMR ( $\text{CDCl}_3$ , TMS, 300 MHz)  $\delta$  0.91 (3H, t,  $J = 7.2$  Hz, Me), 2.92 (3H, s, Me), 2.44-2.61 (2H, m,  $\text{CH}_2$ ), 5.40 (1H, d,  $J = 9.3$  Hz, CH), 6.06-6.08 (3H, m, = $\text{CH}_2$  and NH), 6.52 (1H, d,  $J = 8.4$  Hz, Ar), 6.88 (1H, d,  $J = 2.1$  Hz, OH),

6.99 (1H, dd,  $J = 8.4, 1.8$  Hz, Ar), 7.38 (1H, d,  $J = 7.8$  Hz, Ar), 7.15-7.24 (1H, m, Ar), 7.49 (2H, d,  $J = 7.8$  Hz, Ar);  $^{13}\text{C}$  NMR ( $\text{CDCl}_3$ , TMS, 75 MHz)  $\delta$  7.8, 21.44, 31.1, 53.2, 112.5, 118.6, 126.3, 126.7, 127.0, 129.4, 129.6, 131.5, 136.1, 143.7, 145.4, 152.3, 202.4; MS (EI)  $m/e$  209 ( $\text{M}^+ - 228, 15.9$ ), 171 ( $\text{M}^+ - 266, 16.6$ ), 155 ( $\text{M}^+ - 282, 18.3$ ), 91 ( $\text{M}^+ - 346, 100.0$ ), 65 ( $\text{M}^+ - 372, 28.0$ ), 63 ( $\text{M}^+ - 374, 15.3$ ), 57 ( $\text{M}^+ - 380, 52.3$ ), 51 ( $\text{M}^+ - 386, 15.5$ ). Anal. Calcd. for  $\text{C}_{19}\text{H}_{20}\text{BrNO}_4\text{S}$  requires C, 52.06; H, 4.60; N, 3.20%. Found: C, 51.73; H, 4.61; N, 3.07%.

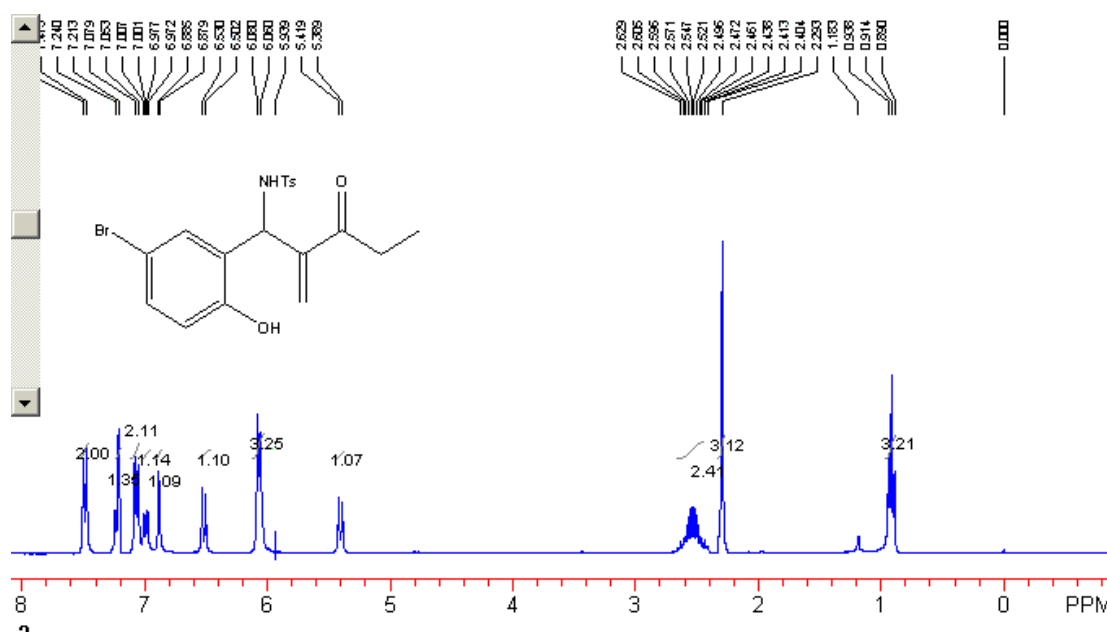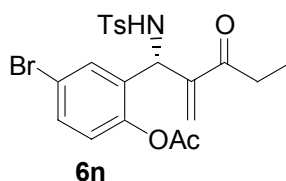

**4-Bromo-2-(2-methylene-1-(4-methylphenylsulfonamido)-3-oxopentyl)phenyl acetate 6n:**

Yellow solid (cubes obtained by recrystallization from  $\text{CH}_2\text{Cl}_2/\text{PE} = 3/1$ ):  $ee$  92%,  $[\alpha]_{\text{D}}^{20}$  22 (c 0.70,  $\text{CHCl}_3$ ), mp. 69-71 °C; IR (KBr)  $\nu$  3283, 2924, 1765, 1679, 1598, 1479, 1265, 1198, 1163, 1013  $\text{cm}^{-1}$ ;  $^1\text{H}$  NMR ( $\text{CDCl}_3$ , TMS, 300 MHz)  $\delta$  0.96 (3H, t,  $J = 7.2$  Hz, Me), 2.28 (3H, s, Me), 2.39 (3H, s, Me), 2.44-2.62 (2H, m,  $\text{CH}_2$ ), 5.52 (1H, d,  $J = 8.8$  Hz, CH), 5.64 (1H, d,  $J$

= 8.8 Hz, NH), 6.00 (1H, s, =CH), 6.09 (1H, s, =CH), 6.82 (1H, d,  $J = 8.4$  Hz, Ar), 7.10 (1H, d,  $J = 1.8$  Hz), 7.18 (2H, d,  $J = 8.0$  Hz, Ar), 7.34-7.44 (1H, m, Ar), 7.58 (2H, d,  $J = 8.0$  Hz, Ar). MS (ESI)  $m/e$  479 ( $M^+ + 18$ ), 499 ( $M^+ + 20$ ); HPLC: OD column;  $\lambda = 230$  nm; eluent: Hexane/Isopropanol = 80/20; Flow rate: 0.6 mL/min;  $t_{\text{major}} = 11.29$  min;  $t_{\text{minor}} = 9.54$  min;  $ee\% = 92\%$ .

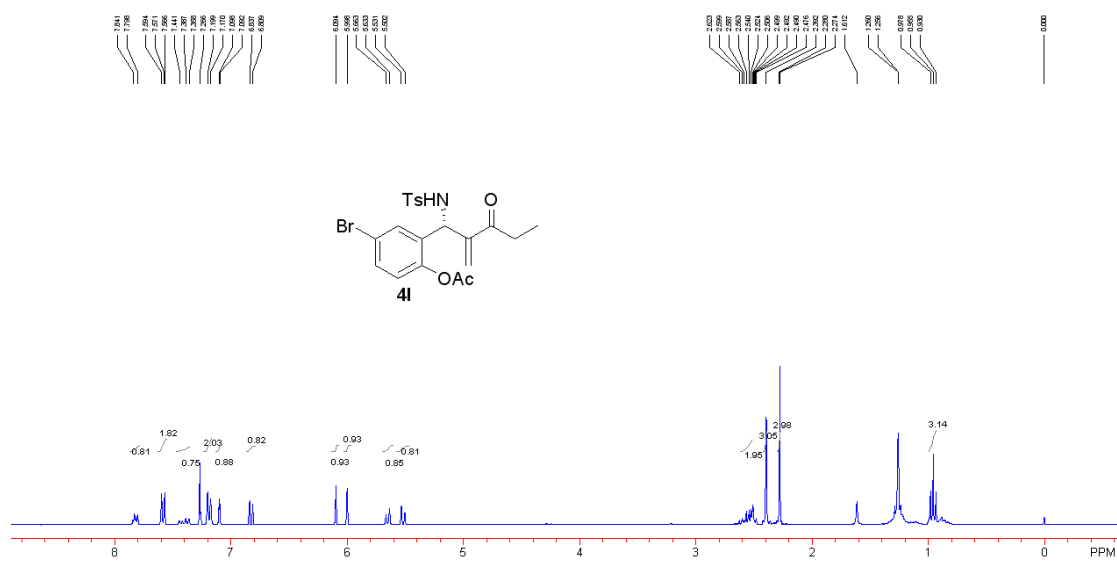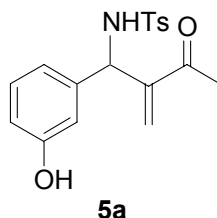

### **N-(1-(3-hydroxyphenyl)-2-methylene-3-oxobutyl)-4-methylbenzenesulfonamide 5a.**

This is a new compound. IR ( $\text{CH}_2\text{Cl}_2$ )  $\nu$  3410, 3291, 2925, 1707, 1674, 1600, 1159, 965, 700  $\text{cm}^{-1}$ ;  $^1\text{H}$  NMR ( $\text{CDCl}_3$ , 300 MHz, TMS):  $\delta$  2.15 (3H, s,  $\text{CH}_3$ ), 2.40 (3H, s,  $\text{CH}_3$ ), 5.21 (1H, d,  $J = 8.7$  Hz, CH), 5.34 (1H, s, OH), 5.72 (1H, d,  $J = 8.7$  Hz, NH), 6.04 (1H, s, =CH), 6.08 (1H, s, =CH), 6.58-6.73 (3H, m, Ar), 7.05 (1H, t,  $J = 7.8$  Hz, Ar), 7.23 (2H, d,  $J = 8.1$  Hz, Ar), 7.64 (2H, d,  $J = 8.1$  Hz, Ar).  $^{13}\text{C}$  NMR ( $\text{CDCl}_3$ , 75 MHz):  $\delta$  21.5, 26.3, 58.5, 113.5, 114.8, 118.4,

127.2, 128.6, 129.5, 129.7, 137.2, 140.5, 143.5, 146.2, 155.9, 199.1. MS (ESI)  $m/z$  346 ( $M^+ + 1$ ), 175. HRMS(MALDI) Calcd. for  $C_{18}H_{19}NO_4S$  requires ( $M^+ + Na^+$ ) 368.0925, Found 368.0927.

$[\alpha]_D^{20} = -1.6$  ( $CHCl_3$ , 0.55); Enantiomeric excess was determined by HPLC with a Chiralcel OD-H column: hexane/*i*PrOH = 90/10, 0.5 mL/min, 230 nm,  $t_{minor} = 39.46$  min;  $t_{major} = 48.71$  min, -2.0% *ee* ( $\beta$ -ICPD used as the catalyst).

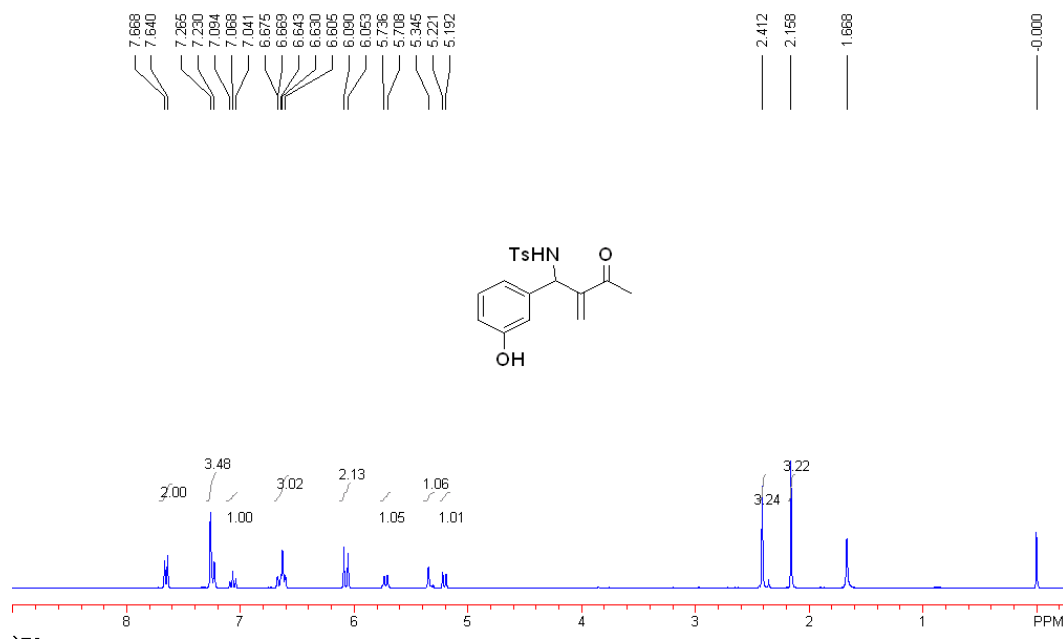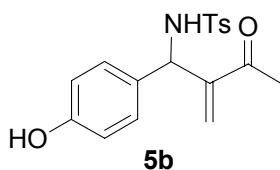

**N-(1-(4-hydroxyphenyl)-2-methylene-3-oxobutyl)-4-methylbenzenesulfonamide 5b.**

This is a new compound. IR ( $CH_2Cl_2$ )  $\nu$  3370, 3065, 2923, 2853, 1591, 1568, 1441, 1289, 1152, 1068  $cm^{-1}$ ;  $^1H$  NMR ( $CDCl_3$ , 300 MHz, TMS):  $\delta$  2.17 (3H, s,  $CH_3$ ), 2.42 (3H, s,  $CH_3$ ), 5.20 (1H, d,  $J = 8.4$  Hz, CH), 5.25 (1H, s, OH), 5.52 (1H, d,  $J = 8.4$  Hz, NH), 6.09 (1H, s, =CH), 6.10 (1H, s, =CH), 6.64 (2H, d,  $J = 8.7$  Hz, Ar), 6.93 (2H, d,  $J = 8.7$  Hz, Ar), 7.25 (2H,



d,  $J = 8.1$  Hz, Ar), 7.66 (2H, d,  $J = 8.1$  Hz, Ar).  $^{13}\text{C}$  NMR ( $\text{CDCl}_3$ , 75 MHz):  $\delta$  21.5, 26.2, 48.0, 116.5, 124.3, 126.2, 127.6, 129.8, 134.1, 135.0, 144.5, 163.1, 169.7, 196.7. MS (EI)  $m/z$  190 ( $\text{M}^+ - 155$ , 93.7), 155 (21.7), 131 (20.1), 96 (16.5), 91 (100.0). Anal. Calcd. For  $\text{C}_{18}\text{H}_{19}\text{NO}_4\text{S}$  requires C, 62.59; H, 5.54; N, 4.06%. Found: C, 62.67; H, 5.63; N, 3.86%.

$[\alpha]_{\text{D}}^{20} = +7.0$  ( $\text{CHCl}_3$ , 0.30); Enantiomeric excess was determined by HPLC with a Chiralcel OJ-H column: hexane/*i*PrOH = 60/40, 0.5 mL/min, 230 nm,  $t_{\text{major}} = 28.54$  min,  $t_{\text{minor}} = 37.96$  min; 10.1% ee ( $\beta$ -ICPD used as the catalyst).

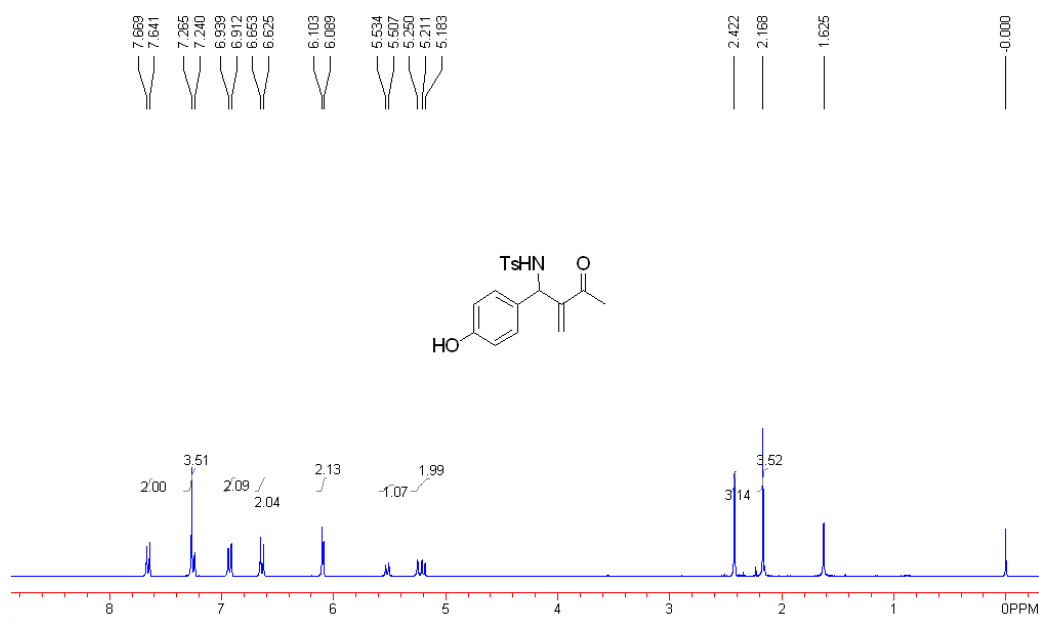

#### References:

1. Shi, Y. L.; Shi, M. *Org. Lett.* **2005**, *7*, 3057-3060.
2. Iwabuchi, Y.; Nakatani, M.; Yokoyama, N.; Hatakeyama, S. *J. Am. Chem. Soc.* **1999**, *121*, 10219-10220.
3. Qi, M.-J.; Shi, M. *Tetrahedron* **2007**, *63*, 10415-10424.
4. The X-ray crystal data of **6a** (CCDC 601323) and **7a** (CCDC 633231) have been summarized in the Supporting Information.
5. Kuroda, R.; Mason, S. F. *J. Chem. Soc., Dalton* **1979**, 727.

Chiral HPLC charts:

*Chiral HPLC trace*

### HPLC REPORT

Sample Name: lxx-9-47. che  
Time: 10:01  
column:  
Velocity:

Date: 2008-02-28  
Method:  
the mobile phase:  
the detection wavelength:

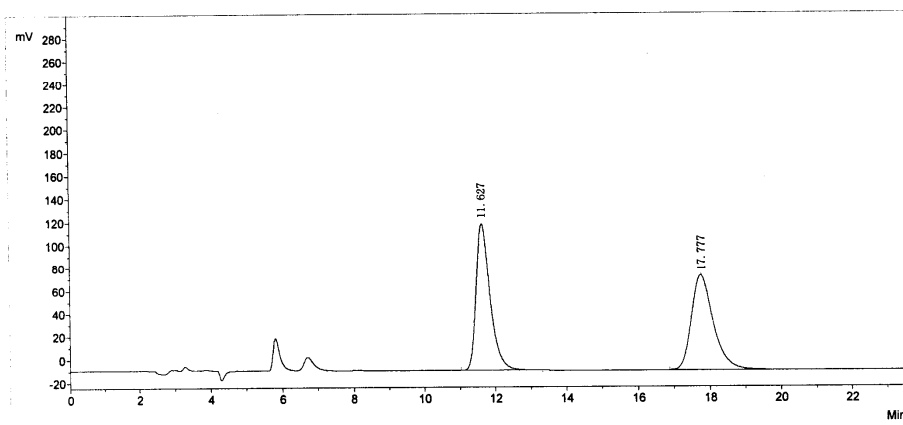

| No.   | PeakNo | R. Time | PeakHeight | PeakArea  | PerCent  |
|-------|--------|---------|------------|-----------|----------|
| 1     | 1      | 11.627  | 127616.0   | 3508537.2 | 50.4465  |
| 2     | 2      | 17.777  | 81843.0    | 3446428.9 | 49.5535  |
| Total |        |         | 209459.0   | 6954966.1 | 100.0000 |

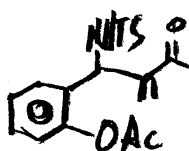

*racemate*

HPLC: Chiralcel AD-H column: hexane/*i*PrOH = 70/30, 0.7 mL/min, 230 nm,  $t_{major}$  = 10.88 min,  $t_{minor}$  = 16.38 min; *racemate*.

Chiral HPLC trace

HPLC REPORT

Sample Name: lxx-9-61. che  
Time: 10:44  
column:  
Velocity:

Date: 2008-03-11  
Method:  
the mobile phase:  
the detection wavelength:

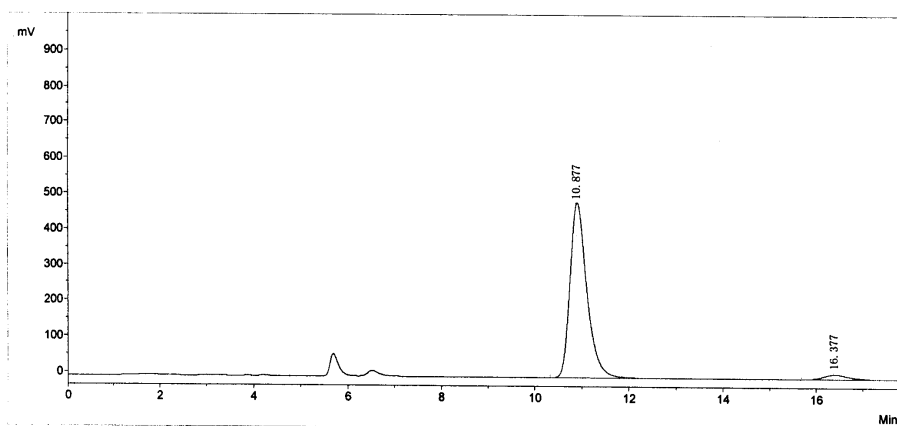

| No.   | PeakNo | R. Time | PeakHeight | PeakArea   | PerCent  |
|-------|--------|---------|------------|------------|----------|
| 1     | 1      | 10.877  | 482642.0   | 12101970.4 | 95.9880  |
| 2     | 2      | 16.377  | 13551.0    | 505824.9   | 4.0120   |
| Total |        |         | 496193.0   | 12607795.3 | 100.0000 |

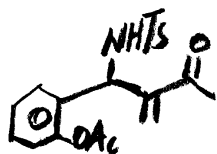

ee% = 92%

AD-11 70/30 0.7 230

HPLC: Compound **3a** (acetate **6a**), Chiralcel AD-H column: hexane/*i*PrOH = 70/30, 0.7 mL/min, 230 nm,  $t_{major}$  = 10.88 min,  $t_{minor}$  = 16.38 min; 92% *ee*.

Chiral HPLC trace

金属有机HPLC分析报告

样品文件名: 92-93-rac. che

分析日期: 2005-11-15

流动相:

检测波长:

分析者:

色谱柱:

流速:

柱压:

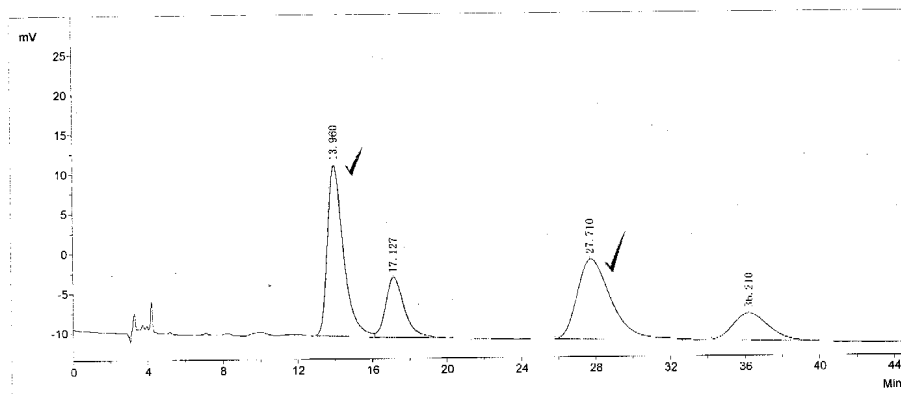

| No.   | R. Time | PeakHeight | PeakArea  | PerCent  |
|-------|---------|------------|-----------|----------|
| 1     | 13.960  | 21448.9    | 1285668.1 | 36.3723  |
| 2     | 17.127  | 7508.0     | 523543.1  | 14.8114  |
| 3     | 27.710  | 10065.5    | 1278452.5 | 36.1682  |
| 4     | 36.210  | 3388.4     | 447077.3  | 12.6481  |
| Total |         | 42410.8    | 3534740.9 | 100.0000 |

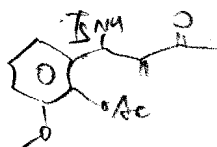

HPLC: OD column;  $\lambda = 230$  nm; eluent: Hexane/Isopropanol = 75/25; Flow rate: 0.6 mL/min;  
 $t_{\text{major}} = 13.63$  min,  $t_{\text{minor}} = 27.46$  min; *racemate*.

Chiral HPLC trace

金属有机HPLC分析报告

样品文件名: 93-19. che  
分析日期: 2005-11-15  
流动相:  
检测波长:

分析者:  
色谱柱:  
流速:  
柱压:

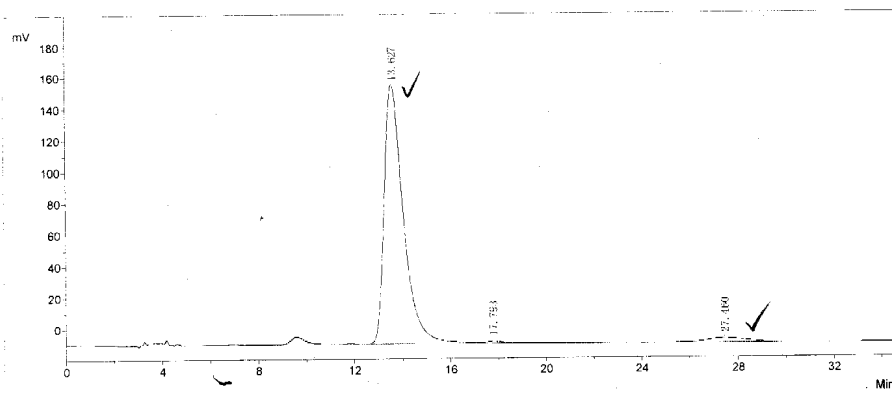

| No.   | R. Time | PeakHeight | PeakArea  | PerCent  |
|-------|---------|------------|-----------|----------|
| 1     | 13.627  | 164149.7   | 9151059.8 | 95.6550  |
| 2     | 17.793  | 1356.5     | 75949.6   | 0.7939   |
| 3     | 27.460  | 2701.1     | 339729.8  | 3.5512   |
| Total |         | 168207.3   | 9566739.2 | 100.0000 |

ee = 93%

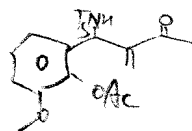

HPLC: Compound **3b** (acetate **6b**), OD column;  $\lambda = 230$  nm; eluent: Hexane/Isopropanol = 75/25; Flow rate: 0.6 mL/min;  $t_{\text{major}} = 13.63$  min,  $t_{\text{minor}} = 27.46$  min;  $ee\% = 93\%$ .

Chiral HPLC trace

金属有机HPLC分析报告

样品文件名: q3-55-ad-70-30. che

分析者:

分析日期: 2005-11-22

色谱柱:

流动相:

流速:

检测波长:

柱压:

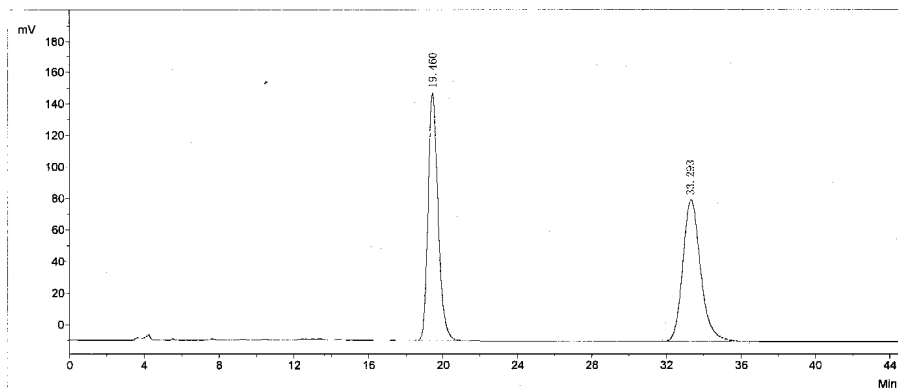

| No.   | R. Time | PeakHeight | PeakArea   | PerCent  |
|-------|---------|------------|------------|----------|
| 1     | 19.460  | 156792.8   | 5879002.2  | 49.7401  |
| 2     | 33.293  | 89134.4    | 5940449.0  | 50.2599  |
| Total |         | 245927.2   | 11819451.2 | 100.0000 |

HPLC: AD column;  $\lambda = 230$  nm; eluent: Hexane/Isopropanol = 70/30; Flow rate: 0.5 mL/min;  
 $t_{\text{major}} = 18.80$  min;  $t_{\text{minor}} = 32.38$  min; *racemate*.

Chiral HPLC trace

金属有机HPLC分析报告

样品文件名: q3-44. che

分析日期: 2005-11-23

流动相:

检测波长:

分析者:

色谱柱:

流速:

柱压:

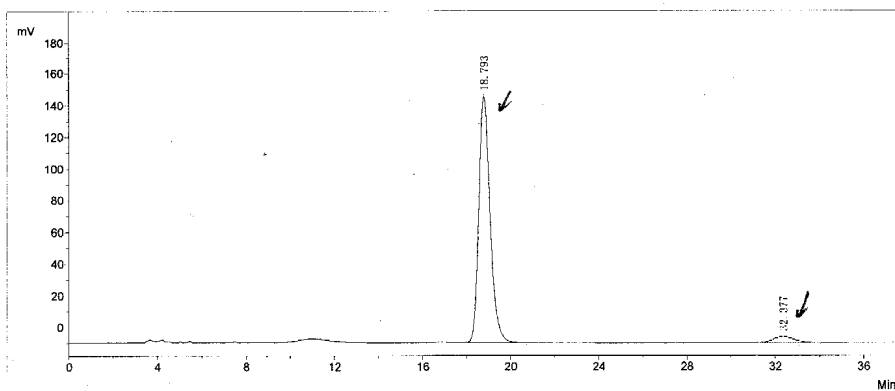

| No.   | R. Time | PeakHeight | PeakArea  | PerCent   |
|-------|---------|------------|-----------|-----------|
| 1     | 18.793  | 155438.2   | 5526313.8 | 95.6966 ✓ |
| 2     | 32.377  | 4037.9     | 248516.5  | 4.3034 ✓  |
| Total |         | 159476.1   | 5774830.3 | 100.0000  |

ee = 92 %

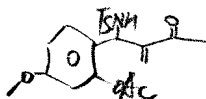

HPLC: Compound **3c** (acetate **6c**), AD column;  $\lambda = 230$  nm; eluent: Hexane/Isopropanol = 70/30; Flow rate: 0.5 mL/min;  $t_{\text{major}} = 18.80$  min;  $t_{\text{minor}} = 32.38$  min;  $ee\% = 92\%$ .

Chiral HPLC trace

色谱分析报告

样品名称:分析谱图  
样品批号:  
分析日期:2005-11-11  
色谱柱:  
流速:

样品文件名:q2-91,.che  
分析者:  
分析时间:14:11  
流动相:  
检测波长:

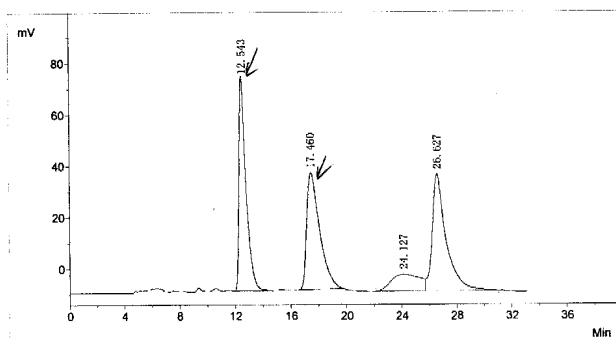

| No.   | PeakNo | ID. Name | R. Time | PeakHeight | PeakArea  | PerCent   |
|-------|--------|----------|---------|------------|-----------|-----------|
| 1     | 1      | Unknown  | 12.543  | 82366.1    | 2889641.7 | 29.2243 ✓ |
| 2     | 2      | Unknown  | 17.460  | 45034.8    | 2905212.1 | 29.3818 ✓ |
| 3     | 3      | Unknown  | 24.127  | 6392.7     | 926929.8  | 9.3745    |
| 4     | 4      | Unknown  | 26.627  | 45279.6    | 3166022.4 | 32.0195   |
| Total |        |          |         | 179073.2   | 9887806.0 | 100.0000  |

HPLC: AD column;  $\lambda = 230$  nm; eluent: Hexane/Isopropanol = 70/30; Flow rate: 0.5 mL/min;  
 $t_{\text{major}} = 17.23$  min;  $t_{\text{minor}} = 13.00$  min; *racemate*.



Chiral HPLC trace

色谱分析报告

样品名称: 分析谱图  
样品批号:  
分析日期: 2005-11-11  
色谱柱:  
流速:

样品文件名: q3-17. che  
分析者:  
分析时间: 13:25  
流动相:  
检测波长:

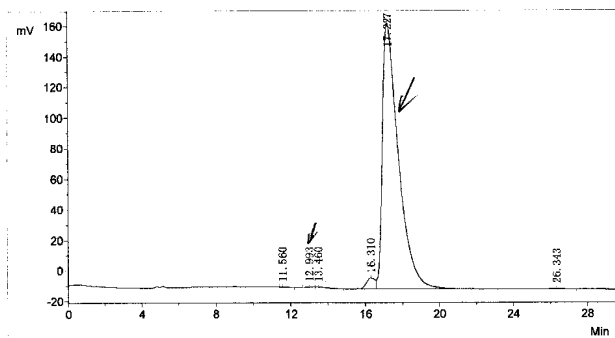

| No.   | PeakNo | ID. Name | R. Time | PeakHeight | PeakArea   | PerCent   |
|-------|--------|----------|---------|------------|------------|-----------|
| 1     | 1      | Unknown  | 11.560  | 107.8      | 1757.4     | 0.0165    |
| 2     | 2      | Unknown  | 12.993  | 320.5      | 6158.8     | 0.0577 ✓  |
| 3     | 4      | Unknown  | 16.310  | 7261.1     | 228257.7   | 2.1373    |
| 4     | 5      | Unknown  | 17.227  | 173720.5   | 10426197.7 | 97.6281 ✓ |
| 5     | 6      | Unknown  | 26.343  | 370.7      | 17135.2    | 0.1604    |
| Total |        |          |         | 181780.6   | 10679506.8 | 100.0000  |

ee = 99.9

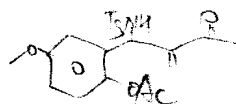

HPLC: Compound **3d** (acetate **6d**), AD column;  $\lambda = 230$  nm; eluent: Hexane/Isopropanol = 70/30; Flow rate: 0.5 mL/min;  $t_{\text{major}} = 17.23$  min;  $t_{\text{minor}} = 13.00$  min;  $ee\% = 99.9\%$ .

Chiral HPLC trace

金属有机HPLC分析报告

样品文件名: q3-62-0d-70-30. che

分析者:

分析日期: 2005-11-25

色谱柱:

流动相:

流速:

检测波长:

柱压:

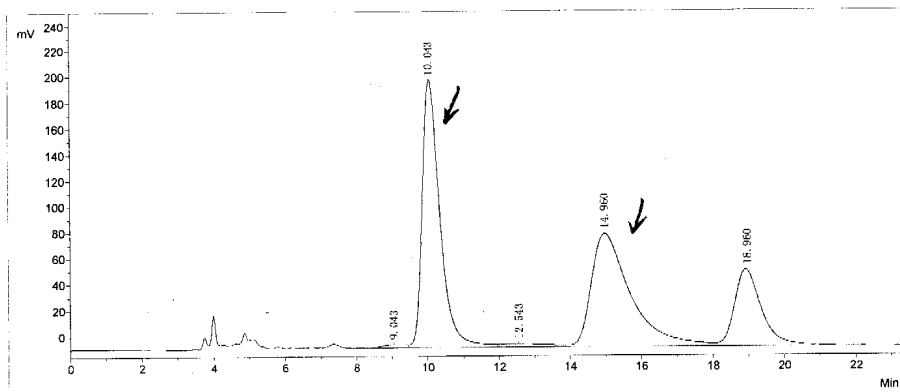

| No.   | R. Time | PeakHeight | PeakArea   | PerCent   |
|-------|---------|------------|------------|-----------|
| 1     | 9.043   | 2612.7     | 112506.6   | 0.6532    |
| 2     | 10.043  | 205109.5   | 7119835.5  | 41.3378 ✓ |
| 3     | 12.543  | 2645.7     | 240618.3   | 1.3970    |
| 4     | 14.960  | 86647.6    | 6644958.4  | 38.5807 ✓ |
| 5     | 18.960  | 58527.6    | 3105617.7  | 18.0312   |
| Total |         | 355543.0   | 17223536.5 | 100.0000  |

HPLC: OD column;  $\lambda = 230$  nm; eluent: Hexane/Isopropanol = 70/30; Flow rate: 0.5 mL/min;  
 $t_{\text{major}} = 14.63$  min;  $t_{\text{minor}} = 10.13$  min; *racemate*.

Chiral HPLC trace

金属有机HPLC分析报告

样品文件名: q3-63. che

分析日期: 2005-11-25

流动相:

检测波长:

分析者:

色谱柱:

流速:

柱压:

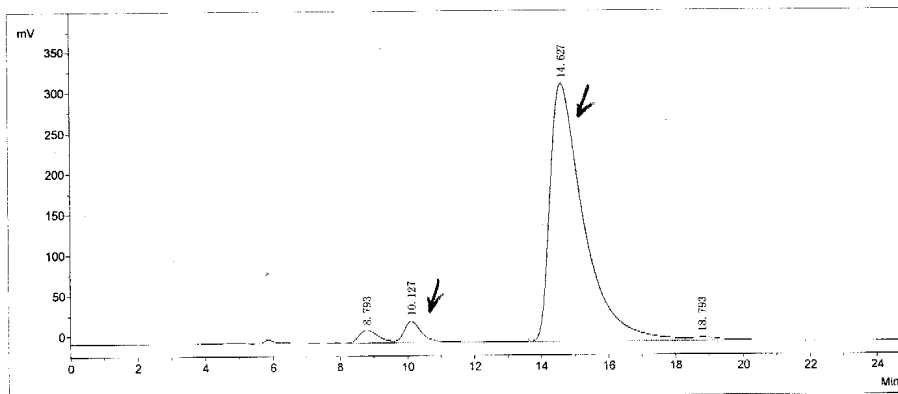

| No.   | R. Time | PeakHeight | PeakArea   | PerCent  |
|-------|---------|------------|------------|----------|
| 1     | 8.793   | 15383.6    | 627622.5   | 2.6100   |
| 2     | 10.127  | 26222.6    | 949830.8   | 3.9499   |
| 3     | 14.627  | 317001.7   | 22154886.0 | 92.1328  |
| 4     | 18.793  | 4447.4     | 314348.6   | 1.3072   |
| Total |         | 363055.3   | 24046687.9 | 100.0000 |

EE = 91.8 = 92%

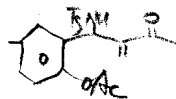

HPLC: Compound **3e** (acetate **6e**), OD column;  $\lambda = 230$  nm; eluent: Hexane/Isopropanol = 70/30; Flow rate: 0.5 mL/min;  $t_{\text{major}} = 14.63$  min;  $t_{\text{minor}} = 10.13$  min;  $ee\% = 92\%$ .

Chiral HPLC trace

金属有机HPLC分析报告

样品文件名: q3-37S. che  
分析日期: 2005-11-24  
流动相:  
检测波长:

分析者:  
色谱柱:  
流速:  
柱压:

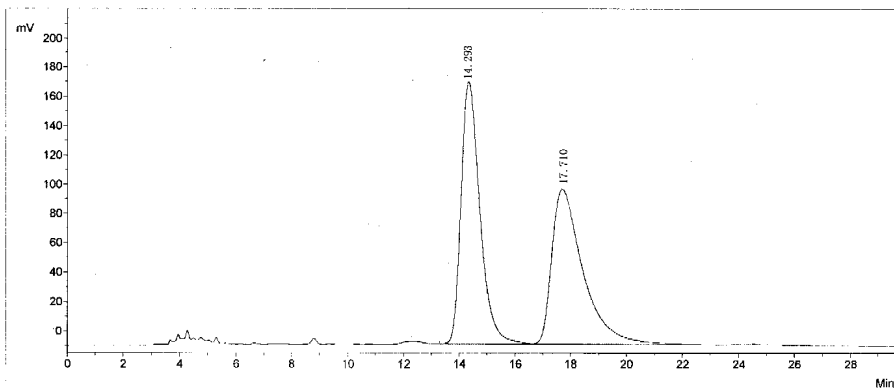

| No.   | R. Time | PeakHeight | PeakArea   | PerCent  |
|-------|---------|------------|------------|----------|
| 1     | 14.293  | 176562.6   | 8372302.9  | 50.4277  |
| 2     | 17.710  | 105495.8   | 8230278.5  | 49.5723  |
| Total |         | 282058.4   | 16602581.4 | 100.0000 |

*el =*

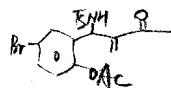

HPLC: OD column;  $\lambda = 230$  nm; eluent: Hexane/Isopropanol = 80/20; Flow rate: 0.5 mL/min;  
 $t_{\text{major}} = 17.38$  min;  $t_{\text{minor}} = 14.46$  min; *racemate*.

Chiral HPLC trace

金属有机HPLC分析报告

样品文件名: q3-28s.che  
分析日期: 2005-11-24  
流动相:  
检测波长:

分析者:  
色谱柱:  
流速:  
柱压:

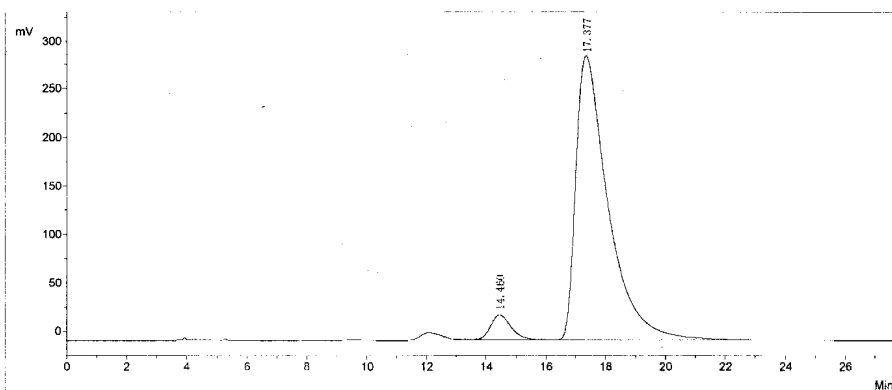

| No.   | R. Time | PeakHeight | PeakArea   | PerCent  |
|-------|---------|------------|------------|----------|
| 1     | 14.460  | 25788.3    | 1238472.1  | 5.3176   |
| 2     | 17.377  | 292085.5   | 22051601.7 | 94.6824  |
| Total |         | 317873.8   | 23290073.8 | 100.0000 |

*ee = 89.4 ≈ 90%*

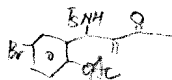

HPLC: Compound **3f** (acetate **6f**), OD column;  $\lambda = 230$  nm; eluent: Hexane/Isopropanol = 80/20; Flow rate: 0.5 mL/min;  $t_{\text{major}} = 17.38$  min;  $t_{\text{minor}} = 14.46$  min;  $ee\% = 90\%$ .

Chiral HPLC trace

### 金属有机HPLC分析报告

样品文件名: q-1-ad-h. che

分析日期: 2006-05-23

流动相:

检测波长:

分析者:

色谱柱:

流速:

柱压:

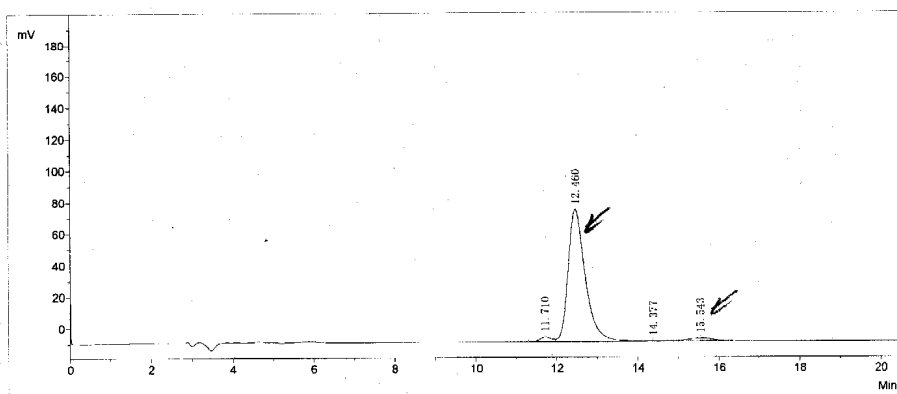

| No.   | R. Time | PeakHeight | PeakArea  | PerCent  |
|-------|---------|------------|-----------|----------|
| 1     | 11.710  | 2905.4     | 56906.2   | 2.1917   |
| 2     | 12.460  | 83649.1    | 2454688.4 | 94.5421  |
| 3     | 14.377  | 314.6      | 9049.4    | 0.3485   |
| 4     | 15.543  | 1766.4     | 75751.8   | 2.9176   |
| Total |         | 88635.5    | 2596395.8 | 100.0000 |

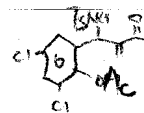

ee = 95%

HPLC: Compound **3g** (acetate **6g**), AD column;  $\lambda = 230$  nm; eluent: Hexane/Isopropanol = 70/30; Flow rate: 0.6 mL/min;  $t_{\text{major}} = 12.46$  min;  $t_{\text{minor}} = 15.54$  min; ee% = 95%.

Chiral HPLC trace

金属有机HPLC分析报告

样品文件名: q3-52. che

分析日期: 2005-11-22

流动相:

检测波长:

分析者:

色谱柱:

流速:

柱压:

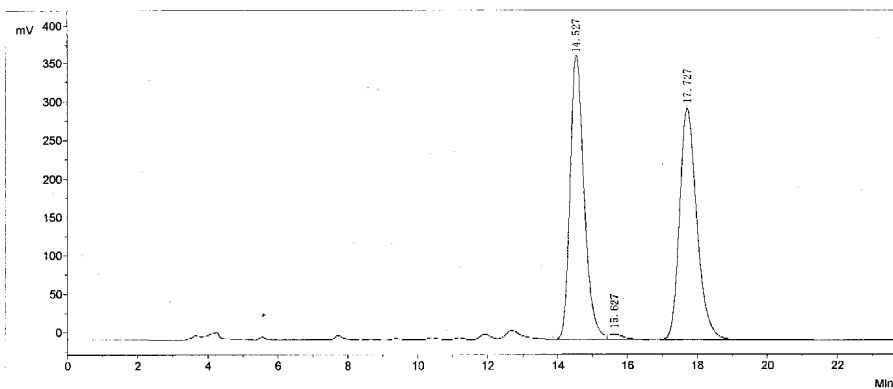

| No.   | R. Time | PeakHeight | PeakArea   | PerCent  |
|-------|---------|------------|------------|----------|
| 1     | 14.527  | 366806.5   | 10284430.0 | 49.5118  |
| 2     | 15.627  | 6745.8     | 189330.9   | 0.9115   |
| 3     | 17.727  | 300088.7   | 10297915.6 | 49.5767  |
| Total |         | 673641.0   | 20771676.5 | 100.0000 |

HPLC: AD column;  $\lambda = 230$  nm; eluent: Hexane/Isopropanol = 70/30; Flow rate: 0.5 mL/min;  
 $t_{\text{major}} = 14.38$  min;  $t_{\text{minor}} = 17.54$  min; *racemate*.

Chiral HPLC trace

金属有机HPLC分析报告

样品文件名: q3-32. che  
分析日期: 2005-11-22  
流动相:  
检测波长:

分析者:  
色谱柱:  
流速:  
柱压:

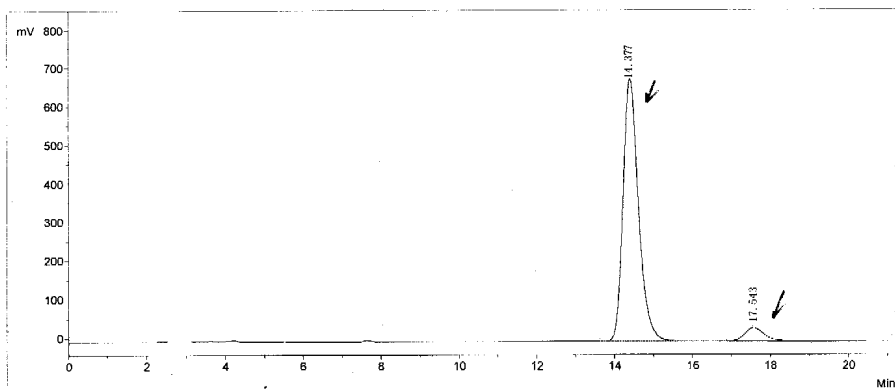

| No.   | R. Time | PeakHeight | PeakArea   | PerCent   |
|-------|---------|------------|------------|-----------|
| 1     | 14.377  | 665013.2   | 18705678.9 | 94.2694 ✓ |
| 2     | 17.543  | 33600.5    | 1137104.1  | 5.7306 ✓  |
| Total |         | 698613.8   | 19842783.0 | 100.0000  |

ee = 90%

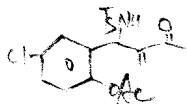

HPLC: Compound **3h** (acetate **6h**), AD column;  $\lambda = 230$  nm; eluent: Hexane/Isopropanol = 70/30; Flow rate: 0.5 mL/min;  $t_{\text{major}} = 14.38$  min;  $t_{\text{minor}} = 17.54$  min;  $ee\% = 90\%$ .



Chiral HPLC trace

HPLC REPORT

Sample Name: lxx-10-38 ad 75. che  
Time: 14:19  
column: AD-H  
Velocity: 75/25 0.7 254  
Date: 2008-05-06  
Method:  
the mobile phase:  
the detection wavelength:

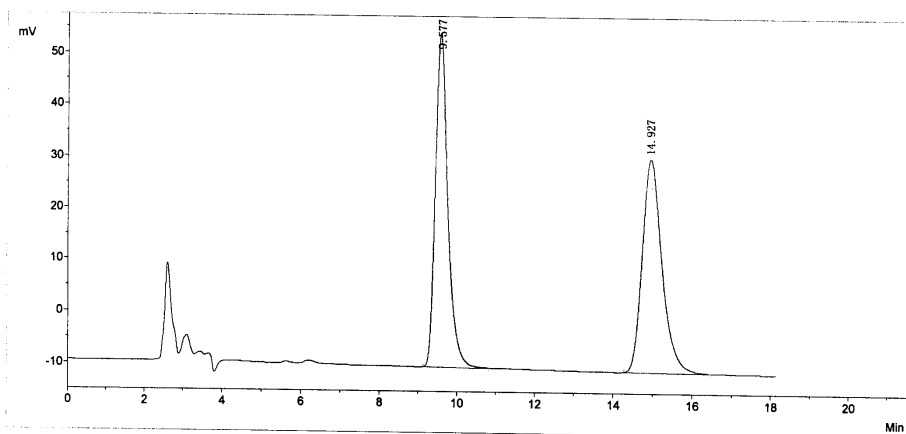

| No.   | PeakNo | R. Time | PeakHeight | PeakArea  | PerCent  |
|-------|--------|---------|------------|-----------|----------|
| 1     | 1      | 9.577   | 63418.4    | 1429772.0 | 50.2061  |
| 2     | 2      | 14.927  | 41010.2    | 1418034.7 | 49.7939  |
| Total |        |         | 104428.6   | 2847806.7 | 100.0000 |

racemate

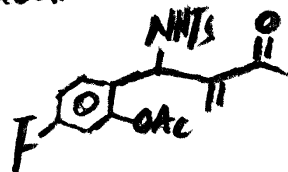

AD-H 75/25 0.7 254

Chiral HPLC report: racemate **3i**, a Chiralcel AD-H column: hexane/*i*PrOH = 75/25, 0.7 mL/min, 254 nm,  $t_{major}$  = 9.48 min,  $t_{minor}$  = 14.83 min.

## HPLC REPORT

Sample Name: lxx-10-35. che

Date: 2008-05-06

Time: 15:13

Method:

column:

the mobile phase:

Velocity:

the detection wavelength:

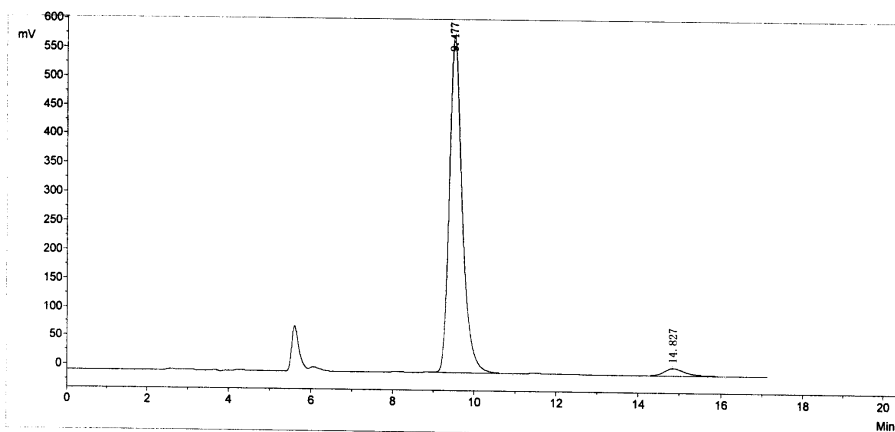

| No.   | PeakNo | R. Time | PeakHeight | PeakArea   | PerCent  |
|-------|--------|---------|------------|------------|----------|
| 1     | 1      | 9.477   | 574991.6   | 12820877.7 | 96.7223  |
| 2     | 2      | 14.827  | 12276.1    | 434465.2   | 3.2777   |
| Total |        |         | 587267.7   | 13255342.9 | 100.0000 |

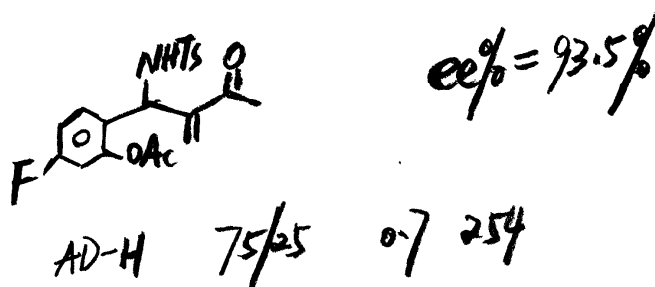

Chiral HPLC report: Enantiomeric excess of compound **3i** (acetate **6i**) was determined by HPLC with a Chiralcel AD-H column: hexane/*i*PrOH = 75/25, 0.7 mL/min, 254 nm,  $t_{major}$  = 9.48 min,  $t_{minor}$  = 14.83 min; 94% *ee*.

Chiral HPLC trace

金属有机HPLC分析报告

样品文件名: q3-74-s. che  
分析日期: 2005-12-14  
流动相:  
检测波长:

分析者:  
色谱柱:  
流速:  
柱压:

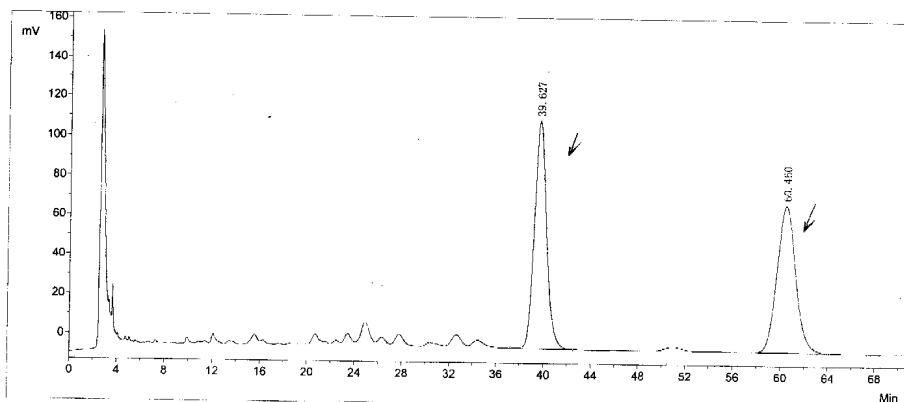

| No.   | R. Time | PeakHeight | PeakArea   | PerCent  |
|-------|---------|------------|------------|----------|
| 1     | 39.627  | 114710.8   | 8212532.0  | 50.3988  |
| 2     | 60.460  | 74308.4    | 8082547.3  | 49.6012  |
| Total |         | 189019.2   | 16295079.3 | 100.0000 |

HPLC: AD column;  $\lambda = 230$  nm; eluent: Hexane/Isopropanol = 90/10; Flow rate: 0.5 mL/min;  
 $t_{\text{major}} = 39.54$  min;  $t_{\text{minor}} = 60.96$  min; *racemate*.

Chiral HPLC trace

色谱分析报告

样品名称: 送样分析  
样品批号:  
分析日期: 2005-12-15  
色谱柱:  
流速:  
柱压:

样品文件名: q3-75-s. che  
分析者:  
分析时间: 10:33  
流动相:  
检测波长:

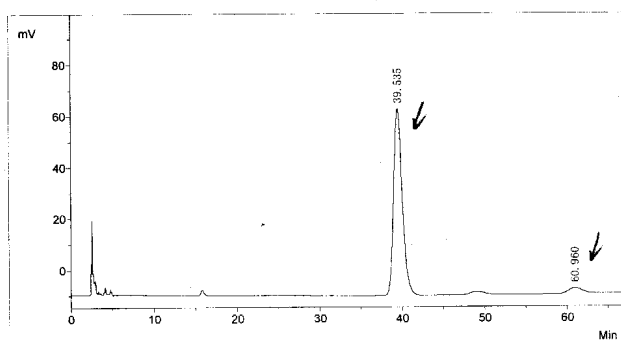

| 序号  | 峰号 | 组份名     | 保留时间   | 峰高      | 峰面积       | 面积百分比 (%) |
|-----|----|---------|--------|---------|-----------|-----------|
| 1   | 1  | Unknown | 39.535 | 72677.8 | 5323109.8 | 96.0310   |
| 2   | 2  | Unknown | 60.960 | 2077.2  | 220004.7  | 3.9690    |
| 合计: |    |         |        | 74755.0 | 5543114.5 | 100.0000  |

*ee = 92.1% = 92%*

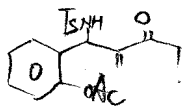

HPLC: Compound **3k** (acetate **6k**), AD column;  $\lambda = 230$  nm; eluent: Hexane/Isopropanol = 90/10; Flow rate: 0.5 mL/min;  $t_{\text{major}} = 39.54$  min;  $t_{\text{minor}} = 60.96$  min;  $ee\% = 92\%$ .

*Chiral HPLC trace*

### 金属有机HPLC分析报告

样品文件名: q3-72-od-h-c-80-20. che

分析者:

分析日期: 2005-12-16

色谱柱:

流动相:

流速:

检测波长:

柱压:

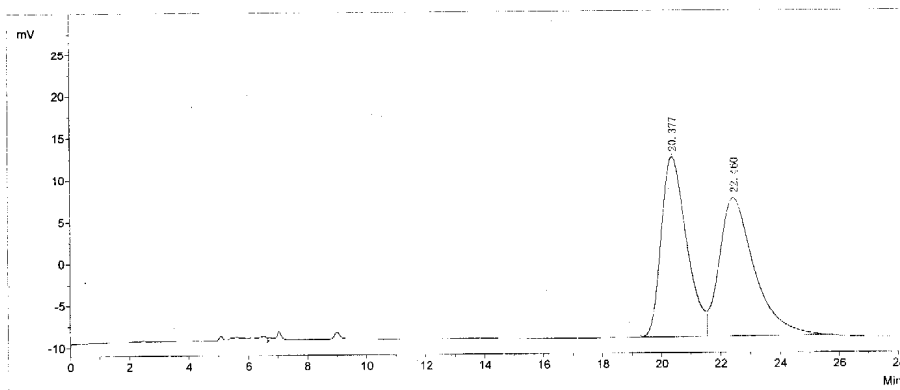

| No.   | R. Time | PeakHeight | PeakArea  | PerCent  |
|-------|---------|------------|-----------|----------|
| 1     | 20.377  | 21507.0    | 1280327.5 | 48.6875  |
| 2     | 22.460  | 16546.9    | 1349355.5 | 51.3125  |
| Total |         | 38053.9    | 2629683.0 | 100.0000 |

HPLC: OD column;  $\lambda = 230$  nm; eluent: Hexane/Isopropanol = 80/20; Flow rate: 0.6 mL/min;  
 $t_{\text{major}} = 22.29$  min;  $t_{\text{minor}} = 20.71$  min; *racemate*.

Chiral HPLC trace

金属有机HPLC分析报告

样品文件名: q3-73. che

分析者:

分析日期: 2005-12-16

色谱柱:

流动相:

流速:

检测波长:

柱压:

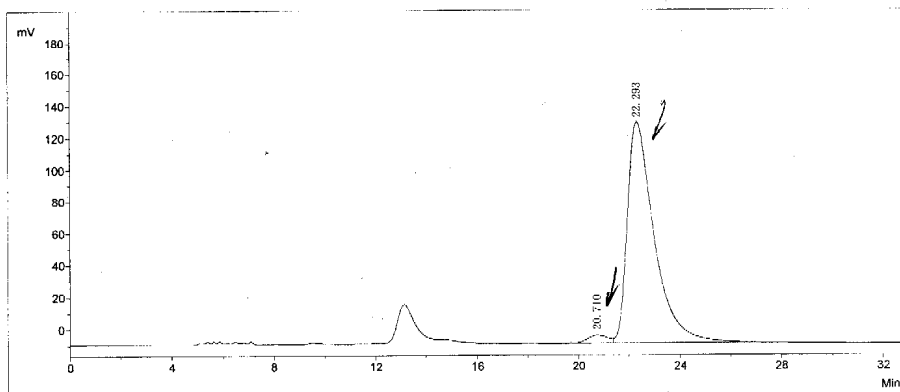

| No.   | R. Time | PeakHeight | PeakArea   | PerCent  |
|-------|---------|------------|------------|----------|
| 1     | 20.710  | 4855.6     | 266172.8   | 2.5513   |
| 2     | 22.293  | 137887.5   | 10166643.5 | 97.4487  |
| Total |         | 142743.1   | 10432816.3 | 100.0000 |

EE = 99.9 = 95%

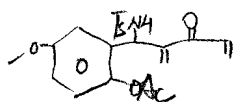

HPLC: Compound **31** (acetate **61**), OD column;  $\lambda = 230$  nm; eluent: Hexane/Isopropanol = 80/20; Flow rate: 0.6 mL/min;  $t_{\text{major}} = 22.29$  min;  $t_{\text{minor}} = 20.71$  min;  $ee\% = 95\%$ .

Chiral HPLC trace

金属有机HPLC分析报告

样品文件名: q3-47s. che

分析者:

分析日期: 2005-12-19

色谱柱:

流动相:

流速:

检测波长:

柱压:

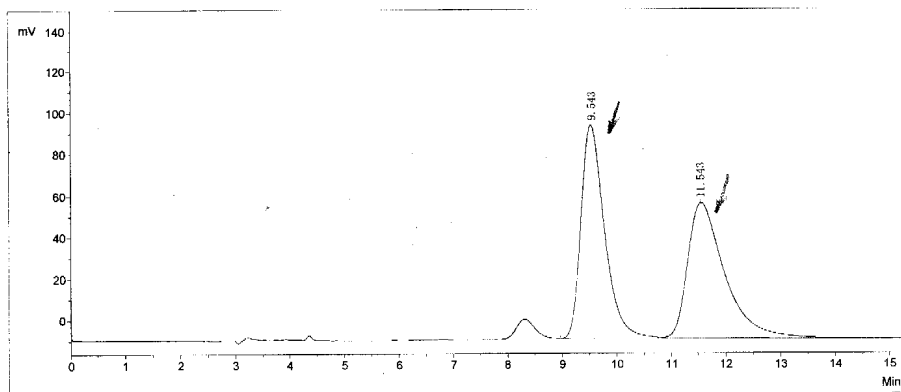

| No.   | R. Time | PeakHeight | PeakArea  | PerCent  |
|-------|---------|------------|-----------|----------|
| 1     | 9.543   | 102733.1   | 3103539.0 | 50.1068  |
| 2     | 11.543  | 65420.4    | 3090307.2 | 49.8932  |
| Total |         | 168153.6   | 6193846.2 | 100.0000 |

HPLC: OD column;  $\lambda = 230$  nm; eluent: Hexane/Isopropanol = 80/20; Flow rate: 0.6 mL/min;  
 $t_{\text{major}} = 11.29$  min;  $t_{\text{minor}} = 9.54$  min; *racemate*.

Chiral HPLC trace

金属有机HPLC分析报告

样品文件名: q3-36. che  
分析日期: 2005-12-19  
流动相:  
检测波长:

分析者:  
色谱柱:  
流速:  
柱压:

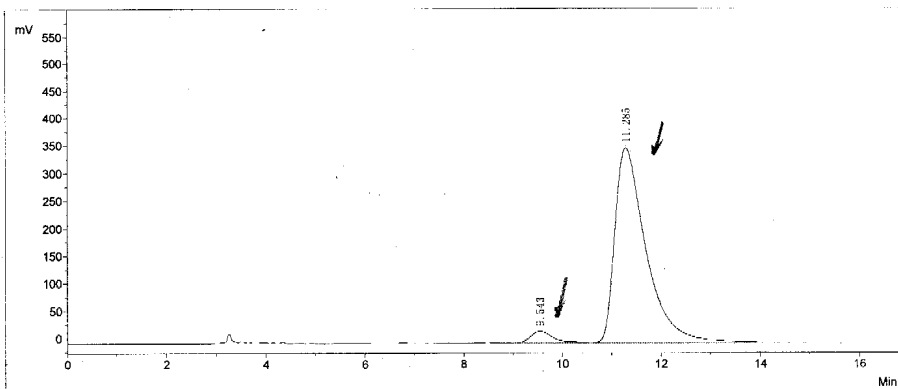

| No.   | R. Time | PeakHeight | PeakArea   | PerCent  |
|-------|---------|------------|------------|----------|
| 1     | 9.543   | 21536.5    | 673239.1   | 4.1363   |
| 2     | 11.285  | 353852.4   | 15603239.8 | 95.8637  |
| Total |         | 375388.9   | 16276478.9 | 100.0000 |

EE = 91.7 ≈ 92%

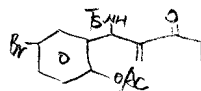

HPLC: Compound **3m** (acetate **6m**), OD column;  $\lambda = 230$  nm; eluent: Hexane/Isopropanol = 80/20; Flow rate: 0.6 mL/min;  $t_{\text{major}} = 11.29$  min;  $t_{\text{minor}} = 9.54$  min;  $ee\% = 92\%$ .



*Chiral HPLC trace*

金属有机HPLC分析报告

样品文件名: q3-50s. che

分析者:

分析日期: 2005-12-20

色谱柱:

流动相:

流速:

检测波长:

柱压:

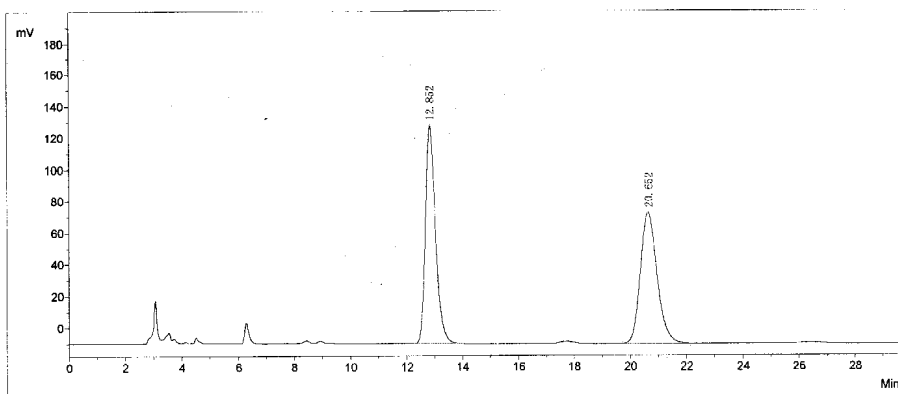

| No.   | R. Time | PeakHeight | PeakArea  | PerCent  |
|-------|---------|------------|-----------|----------|
| 1     | 12.852  | 137492.9   | 3435099.0 | 50.1883  |
| 2     | 20.652  | 82647.4    | 3409326.1 | 49.8117  |
| Total |         | 220140.3   | 6844425.1 | 100.0000 |

HPLC: AD column;  $\lambda = 230$  nm; eluent: Hexane/Isopropanol = 80/20; Flow rate: 0.6 mL/min;  
 $t_{\text{major}} = 12.75$  min;  $t_{\text{minor}} = 20.49$  min; *racemate*.

Chiral HPLC trace

金属有机HPLC分析报告

样品文件名: q3-30. che  
分析日期: 2005-12-20  
流动相:  
检测波长:

分析者:  
色谱柱:  
流速:  
柱压:

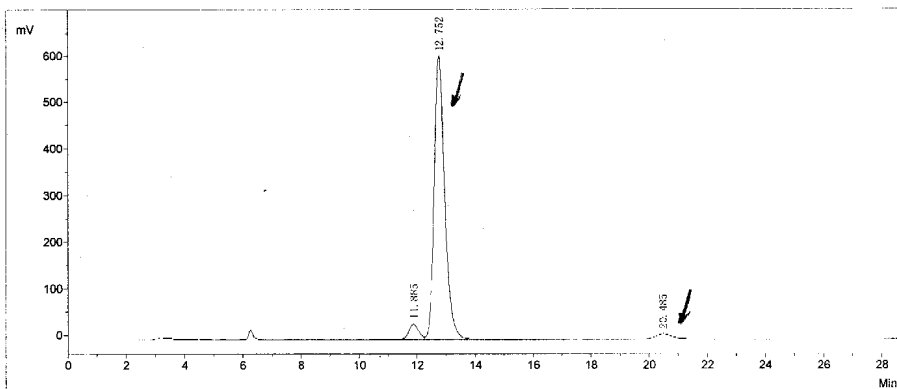

| No.   | R. Time | PeakHeight | PeakArea   | PerCent  |
|-------|---------|------------|------------|----------|
| 1     | 11.885  | 32343.1    | 754701.7   | 4.5671   |
| 2     | 12.752  | 607815.8   | 15317715.2 | 92.6961  |
| 3     | 20.485  | 11178.3    | 452251.0   | 2.7368   |
| Total |         | 651337.2   | 16524667.9 | 100.0000 |

ee = 14.3% = 94%

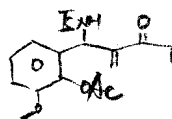

HPLC: Compound **3n** (acetate **6n**), AD column;  $\lambda = 230$  nm; eluent: Hexane/Isopropanol = 80/20; Flow rate: 0.6 mL/min;  $t_{\text{major}} = 12.75$  min;  $t_{\text{minor}} = 20.49$  min; ee% = 94%.

## HPLC REPORT

Sample Name: jyq-3-35-3-9-1-od-150. che      Date: 2008-05-26  
Time: 12:12      Method:  
Column: OD-H (150mm) 90/10      Flow Rate:  
Wave Length: 0.5 230      Mobile Phase:  
色谱柱:      流动相:  
流速:      检测波长:

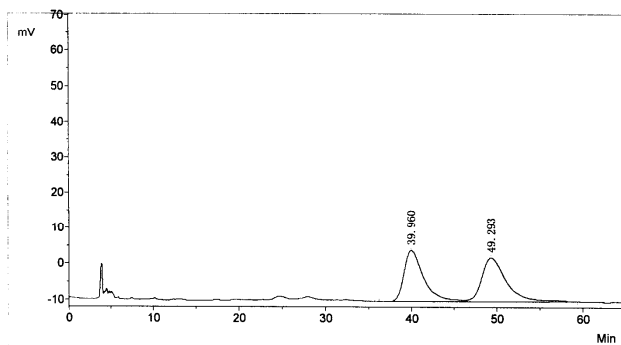

| No.   | PeakNo | ID. Name | R. Time | PeakHeight | PeakArea  | PerCent  |
|-------|--------|----------|---------|------------|-----------|----------|
| 1     | 1      | Unknown  | 39.960  | 14140.6    | 2250997.4 | 48.2991  |
| 2     | 2      | Unknown  | 49.293  | 12089.1    | 2409541.6 | 51.7009  |
| Total |        |          |         | 26229.7    | 4660539.0 | 100.0000 |

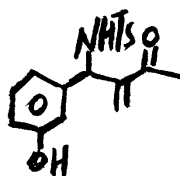

racemate

OD-H 90/10 0.5 230

Chiral HPLC report: racemate. a Chiralcel OD-H column: hexane/*i*PrOH = 90/10, 0.5 mL/min, 230 nm,  $t_{major}$  = 40.29 min,  $t_{minor}$  = 49.79 min

Chiral HPLC trace

HPLC REPORT

Sample Name: jyq-3-25. che

Date: 2008-05-26

Time: 14:19

Method:

Column:

Flow Rate:

Wave Length:

Mobile Phase:

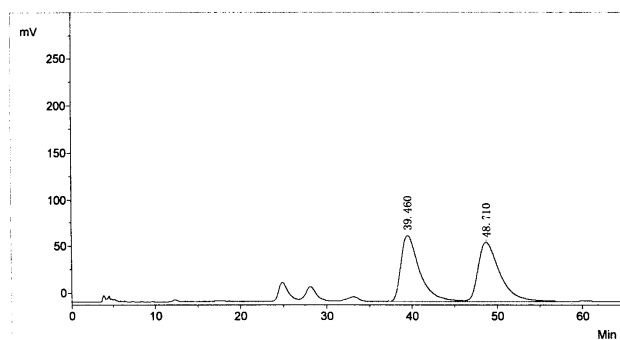

| No.   | PeakNo | ID. Name | R. Time | PeakHeight | PeakArea   | PerCent  |
|-------|--------|----------|---------|------------|------------|----------|
| 1     | 1      | Unknown  | 39.460  | 70492.0    | 10735366.6 | 49.0749  |
| 2     | 2      | Unknown  | 48.710  | 62984.4    | 11140108.2 | 50.9251  |
| Total |        |          |         | 133476.4   | 21875474.8 | 100.0000 |

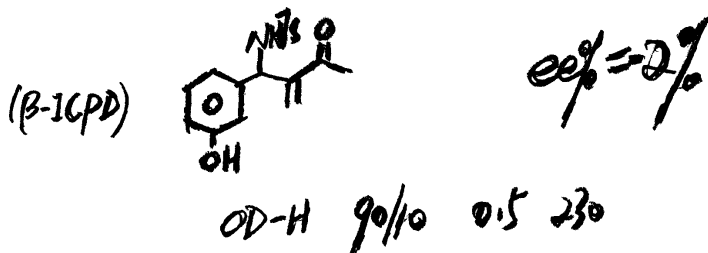

Chiral HPLC report: Enantiomeric excess of **5a** was determined by HPLC with a Chiralcel OD-H column: hexane/*i*PrOH = 90/10, 0.5 mL/min, 230 nm,  $t_{minor}$  = 39.46 min;  $t_{major}$  = 48.71 min, -2.0% *ee*.

Chiral HPLC trace

HPLC REPORT

Sample Name: lxcg-10-48-2-oj-6-4. che Date: 2008-05-23  
Time: 12:50 Method:  
Column: OJ-H (250mm) 0.5 60/40 Flow Rate:  
Wave Length: 230 Mobile Phase:

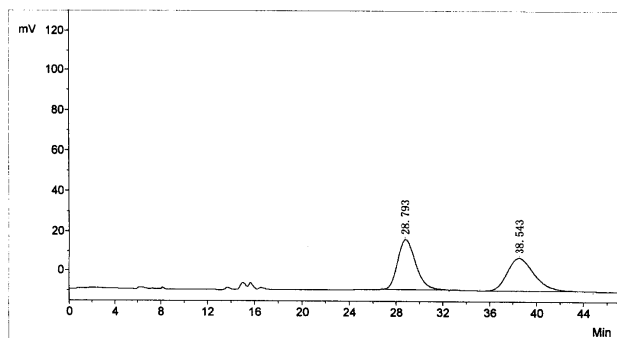

| No.   | PeakNo | ID. Name | R. Time | PeakHeight | PeakArea  | PerCent  |
|-------|--------|----------|---------|------------|-----------|----------|
| 1     | 1      | Unknown  | 28.793  | 25410.3    | 2713595.0 | 50.4845  |
| 2     | 2      | Unknown  | 38.543  | 16502.3    | 2661505.4 | 49.5155  |
| Total |        |          |         | 41912.5    | 5375100.4 | 100.0000 |

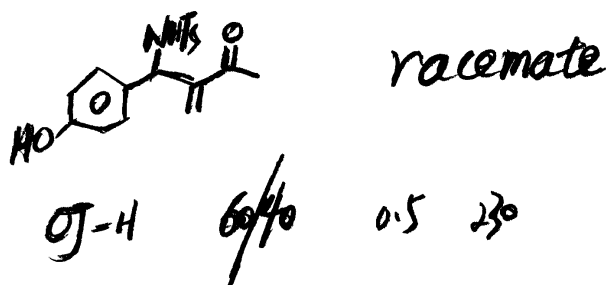

Chiral HPLC report: racemate with a Chiralcel OJ-H column: hexane/*i*PrOH = 60/40, 0.5 mL/min, 230 nm,  $t_{major}$  = 28.54 min,  $t_{minor}$  = 37.96 min.

Chiral HPLC trace

HPLC REPORT

Sample Name:p-OH-3. che

Date:2008-05-23

Time:15:16

Method:

Column:

Flow Rate:

Wave Length:

Mobile Phase:

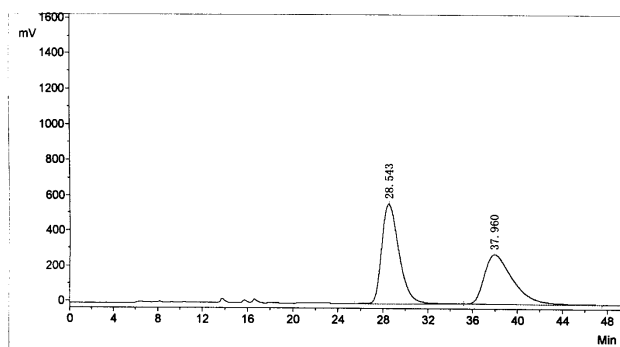

| No.   | PeakNo | ID. Name | R. Time | PeakHeight | PeakArea    | PerCent  |
|-------|--------|----------|---------|------------|-------------|----------|
| 1     | 1      | Unknown  | 28.543  | 565429.4   | 60013922.6  | 55.0961  |
| 2     | 2      | Unknown  | 37.960  | 278293.2   | 48912065.3  | 44.9039  |
| Total |        |          |         | 843722.5   | 108925987.9 | 100.0000 |

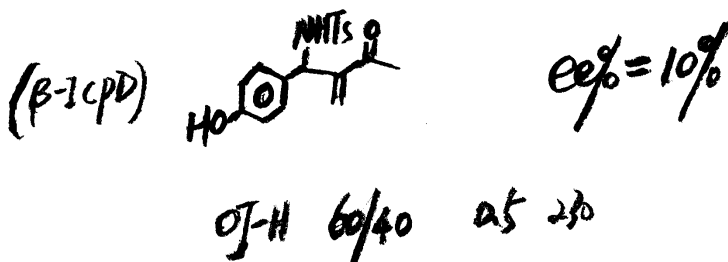

Chiral HPLC report: Enantiomeric excess of **5b** was determined by HPLC with a Chiralcel OJ-H column: hexane/*i*PrOH = 60/40, 0.5 mL/min, 230 nm,  $t_{major}$  = 28.54 min,  $t_{minor}$  = 37.96 min; 10% *ee*.

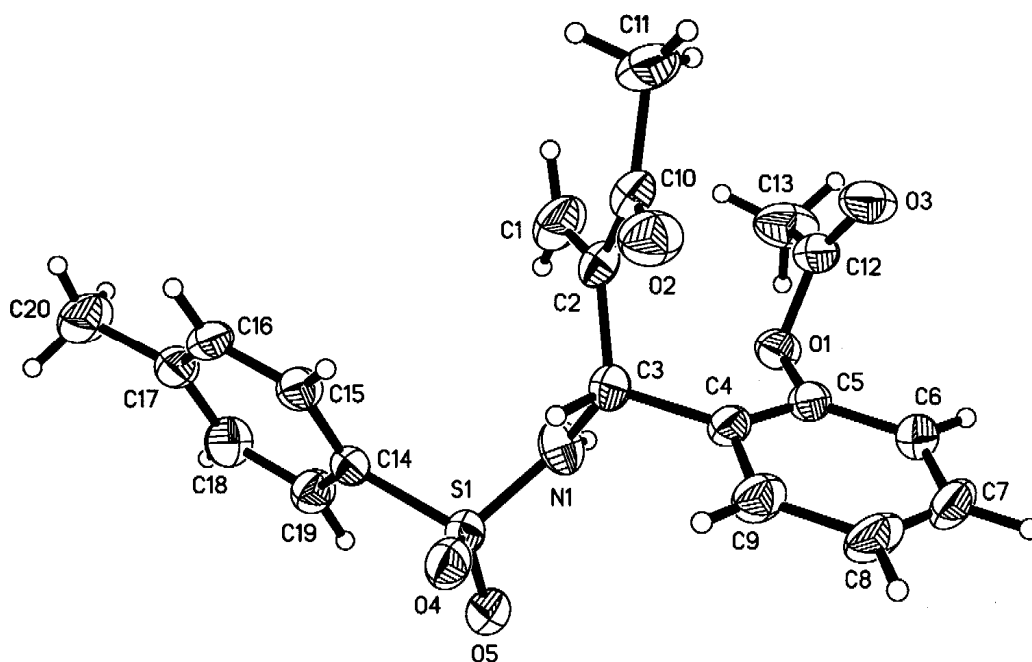

The crystal data of **6a** have been deposited in CCDC with number 601323. Empirical Formula:  $C_{20}H_{21}NO_2S$ ; Formula Weight: 387.44; Crystal Color, Habit: colorless, prismatic; Crystal System: Monoclinic; Lattice Type: Primitive; Lattice Parameters:  $a = 8.8105(13)\text{\AA}$ ,  $b = 9.4689(13)\text{\AA}$ ,  $c = 12.1148(17)\text{\AA}$ ,  $\alpha = 90^\circ$ ,  $\beta = 103.853(2)^\circ$ ,  $\gamma = 90^\circ$ ,  $V = 981.3(2)\text{\AA}^3$ ; Space group:  $P2(1)$ ;  $Z = 2$ ;  $D_{calc} = 1.311\text{ g/cm}^3$ ;  $F_{000} = 408$ ; Diffractometer: Rigaku AFC7R; Residuals: R;  $R_w$ : 0.0636, 0.1529.

Table 1. Crystal data and structure refinement for cd2677.

|                                   |                                                                                                                           |
|-----------------------------------|---------------------------------------------------------------------------------------------------------------------------|
| Identification code               | cd2677                                                                                                                    |
| Empirical formula                 | C20 H21 N O5 S                                                                                                            |
| Formula weight                    | 387.44                                                                                                                    |
| Temperature                       | 293(2) K                                                                                                                  |
| Wavelength                        | 0.71073 Å                                                                                                                 |
| Crystal system, space group       | Monoclinic, P2(1)                                                                                                         |
| Unit cell dimensions              | a = 8.8105(13) Å    alpha = 90 deg.<br>b = 9.4689(13) Å    beta = 103.853(2) deg.<br>c = 12.1148(17) Å    gamma = 90 deg. |
| Volume                            | 981.3(2) Å <sup>3</sup>                                                                                                   |
| Z, Calculated density             | 2, 1.311 Mg/m <sup>3</sup>                                                                                                |
| Absorption coefficient            | 0.195 mm <sup>-1</sup>                                                                                                    |
| F(000)                            | 408                                                                                                                       |
| Crystal size                      | 0.510 x 0.485 x 0.228 mm                                                                                                  |
| Theta range for data collection   | 1.73 to 27.00 deg.                                                                                                        |
| Limiting indices                  | -8<=h<=11, -12<=k<=11, -15<=l<=14                                                                                         |
| Reflections collected / unique    | 5737 / 4019 [R(int) = 0.1286]                                                                                             |
| Completeness to theta = 27.00     | 99.6 %                                                                                                                    |
| Absorption correction             | Empirical                                                                                                                 |
| Max. and min. transmission        | 1.00000 and 0.53634                                                                                                       |
| Refinement method                 | Full-matrix least-squares on F <sup>2</sup>                                                                               |
| Data / restraints / parameters    | 4019 / 2 / 255                                                                                                            |
| Goodness-of-fit on F <sup>2</sup> | 0.977                                                                                                                     |
| Final R indices [I>2sigma(I)]     | R1 = 0.0636, wR2 = 0.1529                                                                                                 |
| R indices (all data)              | R1 = 0.0727, wR2 = 0.1580                                                                                                 |
| Absolute structure parameter      | -0.10(10)                                                                                                                 |
| Largest diff. peak and hole       | 0.471 and -0.339 e.Å <sup>-3</sup>                                                                                        |



Table 2. Atomic coordinates ( $\times 10^4$ ) and equivalent isotropic displacement parameters ( $\text{\AA}^2 \times 10^3$ ) for cd2677. U(eq) is defined as one third of the trace of the orthogonalized  $U_{ij}$  tensor.

|       | x        | y        | z        | U(eq)  |
|-------|----------|----------|----------|--------|
| S(1)  | -529(1)  | 9579(1)  | 10187(1) | 52(1)  |
| O(1)  | 1466(3)  | 12099(3) | 7557(2)  | 56(1)  |
| O(2)  | 2616(4)  | 7528(4)  | 7491(3)  | 83(1)  |
| O(3)  | 3283(3)  | 11888(4) | 6561(2)  | 80(1)  |
| O(4)  | -1038(3) | 8208(3)  | 9779(2)  | 63(1)  |
| O(5)  | -1659(3) | 10623(3) | 10292(2) | 67(1)  |
| N(1)  | 469(4)   | 10214(4) | 9365(3)  | 62(1)  |
| C(1)  | 3734(6)  | 10203(6) | 9529(4)  | 86(1)  |
| C(2)  | 2833(4)  | 9431(5)  | 8743(3)  | 59(1)  |
| C(3)  | 1052(4)  | 9413(4)  | 8535(2)  | 54(1)  |
| C(4)  | 224(4)   | 9861(4)  | 7338(3)  | 50(1)  |
| C(5)  | 480(4)   | 11113(4) | 6864(3)  | 51(1)  |
| C(6)  | -285(5)  | 11504(5) | 5782(3)  | 65(1)  |
| C(7)  | -1376(5) | 10597(6) | 5143(3)  | 73(1)  |
| C(8)  | -1699(4) | 9353(6)  | 5602(3)  | 77(1)  |
| C(9)  | -921(4)  | 8968(5)  | 6694(3)  | 65(1)  |
| C(10) | 3455(5)  | 8414(5)  | 8029(3)  | 67(1)  |
| C(11) | 5146(5)  | 8516(8)  | 7973(4)  | 105(2) |
| C(12) | 2829(4)  | 12464(4) | 7284(3)  | 59(1)  |
| C(13) | 3588(6)  | 13632(6) | 8016(5)  | 92(2)  |
| C(14) | 741(4)   | 9365(4)  | 11537(3) | 48(1)  |
| C(15) | 1847(4)  | 8304(4)  | 11705(3) | 55(1)  |
| C(16) | 2826(4)  | 8141(4)  | 12773(3) | 61(1)  |
| C(17) | 2736(4)  | 9019(5)  | 13666(3) | 63(1)  |
| C(18) | 1606(5)  | 10063(4) | 13469(3) | 68(1)  |
| C(19) | 596(4)   | 10239(4) | 12408(3) | 60(1)  |
| C(20) | 3789(5)  | 8811(7)  | 14827(4) | 91(1)  |

Table 3. Bond lengths [Å] and angles [deg] for cd2677.

|                  |            |
|------------------|------------|
| S(1)-O(4)        | 1.424(3)   |
| S(1)-O(5)        | 1.430(3)   |
| S(1)-N(1)        | 1.596(3)   |
| S(1)-C(14)       | 1.758(3)   |
| O(1)-C(12)       | 1.364(4)   |
| O(1)-C(5)        | 1.408(4)   |
| O(2)-C(10)       | 1.202(5)   |
| O(3)-C(12)       | 1.180(4)   |
| N(1)-C(3)        | 1.448(4)   |
| N(1)-H(1)        | 0.834(19)  |
| C(1)-C(2)        | 1.307(6)   |
| C(1)-H(1A)       | 0.9300     |
| C(1)-H(1B)       | 0.9300     |
| C(2)-C(10)       | 1.485(6)   |
| C(2)-C(3)        | 1.529(5)   |
| C(3)-C(4)        | 1.519(4)   |
| C(3)-H(3)        | 0.98(4)    |
| C(4)-C(5)        | 1.359(5)   |
| C(4)-C(9)        | 1.401(5)   |
| C(5)-C(6)        | 1.373(5)   |
| C(6)-C(7)        | 1.381(6)   |
| C(6)-H(6)        | 0.9300     |
| C(7)-C(8)        | 1.362(7)   |
| C(7)-H(7)        | 0.9300     |
| C(8)-C(9)        | 1.384(6)   |
| C(8)-H(8)        | 0.9300     |
| C(9)-H(9)        | 0.9300     |
| C(10)-C(11)      | 1.510(6)   |
| C(11)-H(11A)     | 0.9600     |
| C(11)-H(11B)     | 0.9600     |
| C(11)-H(11C)     | 0.9600     |
| C(12)-C(13)      | 1.474(6)   |
| C(13)-H(13A)     | 0.9600     |
| C(13)-H(13B)     | 0.9600     |
| C(13)-H(13C)     | 0.9600     |
| C(14)-C(19)      | 1.370(5)   |
| C(14)-C(15)      | 1.380(5)   |
| C(15)-C(16)      | 1.381(5)   |
| C(15)-H(15)      | 0.9300     |
| C(16)-C(17)      | 1.382(5)   |
| C(16)-H(16)      | 0.9300     |
| C(17)-C(18)      | 1.383(6)   |
| C(17)-C(20)      | 1.501(5)   |
| C(18)-C(19)      | 1.387(5)   |
| C(18)-H(18)      | 0.9300     |
| C(19)-H(19)      | 0.9300     |
| C(20)-H(20A)     | 0.9600     |
| C(20)-H(20B)     | 0.9600     |
| C(20)-H(20C)     | 0.9600     |
| O(4)-S(1)-O(5)   | 119.53(17) |
| O(4)-S(1)-N(1)   | 107.54(16) |
| O(5)-S(1)-N(1)   | 107.14(17) |
| O(4)-S(1)-C(14)  | 107.18(15) |
| O(5)-S(1)-C(14)  | 107.37(16) |
| N(1)-S(1)-C(14)  | 107.56(17) |
| C(12)-O(1)-C(5)  | 118.5(3)   |
| C(3)-N(1)-S(1)   | 125.2(3)   |
| C(3)-N(1)-H(1)   | 119(3)     |
| S(1)-N(1)-H(1)   | 116(3)     |
| C(2)-C(1)-H(1A)  | 120.0      |
| C(2)-C(1)-H(1B)  | 120.0      |
| H(1A)-C(1)-H(1B) | 120.0      |
| C(1)-C(2)-C(10)  | 122.9(4)   |
| C(1)-C(2)-C(3)   | 123.2(4)   |
| C(10)-C(2)-C(3)  | 113.8(3)   |
| N(1)-C(3)-C(4)   | 110.3(3)   |
| N(1)-C(3)-C(2)   | 113.6(3)   |

|                     |          |
|---------------------|----------|
| C(4)-C(3)-C(2)      | 113.2(3) |
| N(1)-C(3)-H(3)      | 94(2)    |
| C(4)-C(3)-H(3)      | 114(2)   |
| C(2)-C(3)-H(3)      | 110(2)   |
| C(5)-C(4)-C(9)      | 117.4(3) |
| C(5)-C(4)-C(3)      | 123.8(3) |
| C(9)-C(4)-C(3)      | 118.7(3) |
| C(4)-C(5)-C(6)      | 123.0(3) |
| C(4)-C(5)-O(1)      | 117.9(3) |
| C(6)-C(5)-O(1)      | 118.8(3) |
| C(5)-C(6)-C(7)      | 118.9(4) |
| C(5)-C(6)-H(6)      | 120.5    |
| C(7)-C(6)-H(6)      | 120.5    |
| C(8)-C(7)-C(6)      | 119.7(4) |
| C(8)-C(7)-H(7)      | 120.2    |
| C(6)-C(7)-H(7)      | 120.2    |
| C(7)-C(8)-C(9)      | 120.9(4) |
| C(7)-C(8)-H(8)      | 119.5    |
| C(9)-C(8)-H(8)      | 119.5    |
| C(8)-C(9)-C(4)      | 119.9(4) |
| C(8)-C(9)-H(9)      | 120.0    |
| C(4)-C(9)-H(9)      | 120.0    |
| O(2)-C(10)-C(2)     | 120.3(4) |
| O(2)-C(10)-C(11)    | 120.4(4) |
| C(2)-C(10)-C(11)    | 119.4(4) |
| C(10)-C(11)-H(11A)  | 109.5    |
| C(10)-C(11)-H(11B)  | 109.5    |
| H(11A)-C(11)-H(11B) | 109.5    |
| C(10)-C(11)-H(11C)  | 109.5    |
| H(11A)-C(11)-H(11C) | 109.5    |
| H(11B)-C(11)-H(11C) | 109.5    |
| O(3)-C(12)-O(1)     | 122.6(4) |
| O(3)-C(12)-C(13)    | 127.4(4) |
| O(1)-C(12)-C(13)    | 110.1(3) |
| C(12)-C(13)-H(13A)  | 109.5    |
| C(12)-C(13)-H(13B)  | 109.5    |
| H(13A)-C(13)-H(13B) | 109.5    |
| C(12)-C(13)-H(13C)  | 109.5    |
| H(13A)-C(13)-H(13C) | 109.5    |
| H(13B)-C(13)-H(13C) | 109.5    |
| C(19)-C(14)-C(15)   | 121.2(3) |
| C(19)-C(14)-S(1)    | 119.4(3) |
| C(15)-C(14)-S(1)    | 119.4(2) |
| C(14)-C(15)-C(16)   | 118.7(3) |
| C(14)-C(15)-H(15)   | 120.6    |
| C(16)-C(15)-H(15)   | 120.6    |
| C(15)-C(16)-C(17)   | 121.7(3) |
| C(15)-C(16)-H(16)   | 119.1    |
| C(17)-C(16)-H(16)   | 119.1    |
| C(16)-C(17)-C(18)   | 118.0(3) |
| C(16)-C(17)-C(20)   | 121.1(4) |
| C(18)-C(17)-C(20)   | 120.9(4) |
| C(17)-C(18)-C(19)   | 121.4(3) |
| C(17)-C(18)-H(18)   | 119.3    |
| C(19)-C(18)-H(18)   | 119.3    |
| C(14)-C(19)-C(18)   | 119.0(4) |
| C(14)-C(19)-H(19)   | 120.5    |
| C(18)-C(19)-H(19)   | 120.5    |
| C(17)-C(20)-H(20A)  | 109.5    |
| C(17)-C(20)-H(20B)  | 109.5    |
| H(20A)-C(20)-H(20B) | 109.5    |
| C(17)-C(20)-H(20C)  | 109.5    |
| H(20A)-C(20)-H(20C) | 109.5    |
| H(20B)-C(20)-H(20C) | 109.5    |

---

Symmetry transformations used to generate equivalent atoms:

Table 4. Anisotropic displacement parameters ( $\text{\AA}^2 \times 10^3$ ) for cd2677.  
 The anisotropic displacement factor exponent takes the form:  
 $-2 \pi^2 [ h^2 a^{*2} U_{11} + \dots + 2 h k a^* b^* U_{12} ]$

|       | U11   | U22    | U33    | U23    | U13    | U12    |
|-------|-------|--------|--------|--------|--------|--------|
| S(1)  | 50(1) | 61(1)  | 44(1)  | 6(1)   | 7(1)   | -4(1)  |
| O(1)  | 50(1) | 68(2)  | 53(1)  | -7(1)  | 15(1)  | -4(1)  |
| O(2)  | 70(2) | 98(2)  | 80(2)  | -16(2) | 17(2)  | 5(2)   |
| O(3)  | 48(2) | 122(3) | 71(2)  | -26(2) | 17(1)  | -9(2)  |
| O(4)  | 62(2) | 70(2)  | 52(1)  | 7(1)   | 3(1)   | -4(1)  |
| O(5)  | 61(2) | 74(2)  | 64(2)  | 13(1)  | 13(1)  | 11(1)  |
| N(1)  | 85(2) | 53(2)  | 53(2)  | -5(1)  | 25(2)  | -5(2)  |
| C(1)  | 69(3) | 110(3) | 62(2)  | -2(2)  | -13(2) | 0(3)   |
| C(2)  | 48(2) | 80(2)  | 42(2)  | 9(2)   | -4(1)  | 0(2)   |
| C(3)  | 53(2) | 66(2)  | 40(1)  | 1(2)   | 7(1)   | -2(2)  |
| C(4)  | 40(2) | 67(2)  | 41(1)  | -3(1)  | 5(1)   | 4(1)   |
| C(5)  | 41(2) | 68(2)  | 42(2)  | -6(2)  | 9(1)   | 2(2)   |
| C(6)  | 54(2) | 93(3)  | 48(2)  | 8(2)   | 13(2)  | 11(2)  |
| C(7)  | 54(2) | 115(4) | 43(2)  | -3(2)  | -6(2)  | 17(2)  |
| C(8)  | 46(2) | 114(4) | 59(2)  | -25(2) | -11(2) | -1(2)  |
| C(9)  | 51(2) | 75(2)  | 62(2)  | -8(2)  | 1(2)   | -6(2)  |
| C(10) | 52(2) | 93(3)  | 50(2)  | 13(2)  | 0(2)   | 11(2)  |
| C(11) | 47(2) | 174(6) | 86(3)  | 4(3)   | 0(2)   | 19(3)  |
| C(12) | 45(2) | 75(2)  | 59(2)  | -1(2)  | 12(2)  | 1(2)   |
| C(13) | 62(3) | 106(3) | 109(4) | -35(3) | 23(3)  | -17(3) |
| C(14) | 44(2) | 56(2)  | 44(1)  | 4(1)   | 11(1)  | -5(1)  |
| C(15) | 50(2) | 70(2)  | 46(2)  | -5(2)  | 13(1)  | 3(2)   |
| C(16) | 42(2) | 82(3)  | 56(2)  | 5(2)   | 7(2)   | 9(2)   |
| C(17) | 48(2) | 90(3)  | 48(2)  | 3(2)   | 6(2)   | -7(2)  |
| C(18) | 76(3) | 80(2)  | 47(2)  | -15(2) | 12(2)  | -2(2)  |
| C(19) | 57(2) | 69(2)  | 54(2)  | -1(2)  | 9(2)   | 3(2)   |
| C(20) | 66(3) | 137(4) | 58(2)  | -5(3)  | -11(2) | 0(3)   |

Table 5. Hydrogen coordinates ( $\times 10^4$ ) and isotropic displacement parameters ( $\text{\AA}^2 \times 10^3$ ) for cd2677.

|        | x       | y         | z        | U(eq)  |
|--------|---------|-----------|----------|--------|
| H(1A)  | 4815    | 10128     | 9661     | 103    |
| H(1B)  | 3294    | 10827     | 9957     | 103    |
| H(6)   | -72     | 12367     | 5485     | 78     |
| H(7)   | -1888   | 10834     | 4402     | 88     |
| H(8)   | -2452   | 8753      | 5177     | 92     |
| H(9)   | -1158   | 8119      | 6999     | 78     |
| H(11A) | 5315    | 7932      | 7366     | 157    |
| H(11B) | 5806    | 8202      | 8680     | 157    |
| H(11C) | 5391    | 9479      | 7837     | 157    |
| H(13A) | 4251    | 13254     | 8698     | 138    |
| H(13B) | 2804    | 14222     | 8208     | 138    |
| H(13C) | 4204    | 14180     | 7618     | 138    |
| H(15)  | 1931    | 7711      | 11111    | 66     |
| H(16)  | 3566    | 7422      | 12894    | 73     |
| H(18)  | 1520    | 10660     | 14061    | 82     |
| H(19)  | -166    | 10939     | 12289    | 73     |
| H(20A) | 4519    | 8067      | 14800    | 137    |
| H(20B) | 3173    | 8563      | 15353    | 137    |
| H(20C) | 4348    | 9670      | 15070    | 137    |
| H(1)   | 600(50) | 11090(20) | 9400(40) | 70(13) |
| H(3)   | 700(40) | 8500(40)  | 8770(30) | 60(11) |

Table 6. Torsion angles [deg] for cd2677.

|                         |           |
|-------------------------|-----------|
| O(4)-S(1)-N(1)-C(3)     | -13.4(4)  |
| O(5)-S(1)-N(1)-C(3)     | -143.0(3) |
| C(14)-S(1)-N(1)-C(3)    | 101.8(3)  |
| S(1)-N(1)-C(3)-C(4)     | 112.3(4)  |
| S(1)-N(1)-C(3)-C(2)     | -119.4(4) |
| C(1)-C(2)-C(3)-N(1)     | -6.1(6)   |
| C(10)-C(2)-C(3)-N(1)    | 169.6(3)  |
| C(1)-C(2)-C(3)-C(4)     | 120.7(4)  |
| C(10)-C(2)-C(3)-C(4)    | -63.6(4)  |
| N(1)-C(3)-C(4)-C(5)     | 72.5(4)   |
| C(2)-C(3)-C(4)-C(5)     | -56.0(5)  |
| N(1)-C(3)-C(4)-C(9)     | -104.6(4) |
| C(2)-C(3)-C(4)-C(9)     | 126.8(4)  |
| C(9)-C(4)-C(5)-C(6)     | -2.4(5)   |
| C(3)-C(4)-C(5)-C(6)     | -179.6(3) |
| C(9)-C(4)-C(5)-O(1)     | 171.4(3)  |
| C(3)-C(4)-C(5)-O(1)     | -5.8(5)   |
| C(12)-O(1)-C(5)-C(4)    | 116.4(4)  |
| C(12)-O(1)-C(5)-C(6)    | -69.5(4)  |
| C(4)-C(5)-C(6)-C(7)     | 0.5(5)    |
| O(1)-C(5)-C(6)-C(7)     | -173.3(3) |
| C(5)-C(6)-C(7)-C(8)     | 1.6(6)    |
| C(6)-C(7)-C(8)-C(9)     | -1.5(6)   |
| C(7)-C(8)-C(9)-C(4)     | -0.5(6)   |
| C(5)-C(4)-C(9)-C(8)     | 2.4(5)    |
| C(3)-C(4)-C(9)-C(8)     | 179.8(3)  |
| C(1)-C(2)-C(10)-O(2)    | 164.6(5)  |
| C(3)-C(2)-C(10)-O(2)    | -11.2(5)  |
| C(1)-C(2)-C(10)-C(11)   | -16.3(6)  |
| C(3)-C(2)-C(10)-C(11)   | 167.9(4)  |
| C(5)-O(1)-C(12)-O(3)    | -7.5(6)   |
| C(5)-O(1)-C(12)-C(13)   | 172.8(4)  |
| O(4)-S(1)-C(14)-C(19)   | -135.5(3) |
| O(5)-S(1)-C(14)-C(19)   | -5.9(3)   |
| N(1)-S(1)-C(14)-C(19)   | 109.1(3)  |
| O(4)-S(1)-C(14)-C(15)   | 43.4(3)   |
| O(5)-S(1)-C(14)-C(15)   | 173.0(3)  |
| N(1)-S(1)-C(14)-C(15)   | -72.0(3)  |
| C(19)-C(14)-C(15)-C(16) | -0.5(5)   |
| S(1)-C(14)-C(15)-C(16)  | -179.4(3) |
| C(14)-C(15)-C(16)-C(17) | -0.7(5)   |
| C(15)-C(16)-C(17)-C(18) | 1.2(6)    |
| C(15)-C(16)-C(17)-C(20) | 178.9(4)  |
| C(16)-C(17)-C(18)-C(19) | -0.5(6)   |
| C(20)-C(17)-C(18)-C(19) | -178.1(4) |
| C(15)-C(14)-C(19)-C(18) | 1.2(5)    |
| S(1)-C(14)-C(19)-C(18)  | -179.9(3) |
| C(17)-C(18)-C(19)-C(14) | -0.7(6)   |

Symmetry transformations used to generate equivalent atoms:

Table 7. Hydrogen bonds for cd2677 [Å and deg.].

| D-H...A            | d(D-H)    | d(H...A) | d(D...A) | <(DHA) |
|--------------------|-----------|----------|----------|--------|
| N(1)-H(1)...O(4)#1 | 0.834(19) | 2.23(3)  | 3.019(4) | 157(4) |

Symmetry transformations used to generate equivalent atoms:

#1 -x, y+1/2, -z+2

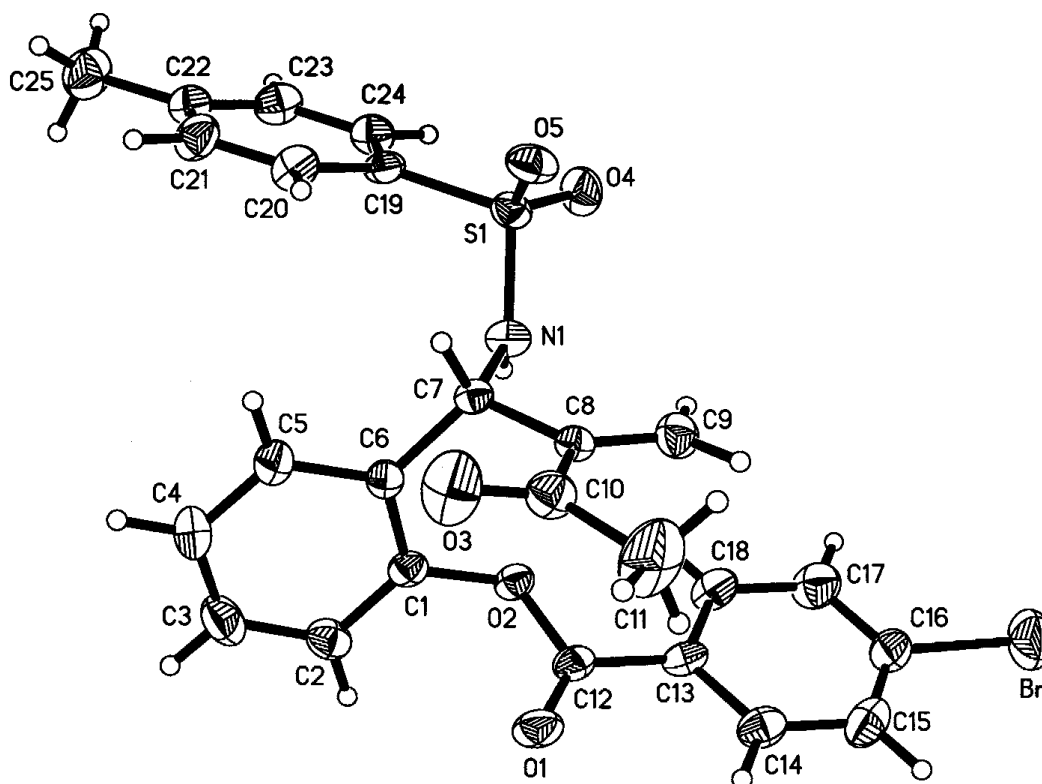

The crystal data of **7a** have been deposited in CCDC with number 632081. Empirical Formula:  $C_{25}H_{22}BrNO_5S$ ; Formula Weight: 528.41; Crystal Color, Habit: colorless, prismatic; Crystal System: Orthorhombic; Lattice Type: Primitive; Lattice Parameters:  $a = 8.9781(11)\text{\AA}$ ,  $b = 10.3536(12)\text{\AA}$ ,  $c = 25.647(3)\text{\AA}$ ,  $\alpha = 90^\circ$ ,  $\beta = 90^\circ$ ,  $\gamma = 90^\circ$ ,  $V = 2384.0(5)\text{\AA}^3$ ; Space group:  $P2(1)2(1)2(1)$ ;  $Z = 4$ ;  $D_{calc} = 1.472\text{ g/cm}^3$ ;  $F_{000} = 1080$ ; Diffractometer: Rigaku AFC7R; Residuals: R;  $R_w = 0.0407, 0.0785$ .



Table 1. Crystal data and structure refinement for cd26535.

|                                   |                                                                                                                  |
|-----------------------------------|------------------------------------------------------------------------------------------------------------------|
| Identification code               | cd26535                                                                                                          |
| Empirical formula                 | C25 H22 Br N O5 S                                                                                                |
| Formula weight                    | 528.41                                                                                                           |
| Temperature                       | 293(2) K                                                                                                         |
| Wavelength                        | 0.71073 Å                                                                                                        |
| Crystal system, space group       | Orthorhombic, P2(1)2(1)2(1)                                                                                      |
| Unit cell dimensions              | a = 8.9781(11) Å    alpha = 90 deg.<br>b = 10.3536(12) Å    beta = 90 deg.<br>c = 25.647(3) Å    gamma = 90 deg. |
| Volume                            | 2384.0(5) Å <sup>3</sup>                                                                                         |
| Z, Calculated density             | 4, 1.472 Mg/m <sup>3</sup>                                                                                       |
| Absorption coefficient            | 1.848 mm <sup>-1</sup>                                                                                           |
| F(000)                            | 1080                                                                                                             |
| Crystal size                      | 0.506 x 0.422 x 0.347 mm                                                                                         |
| Theta range for data collection   | 2.12 to 26.99 deg.                                                                                               |
| Limiting indices                  | -11<=h<=11, -12<=k<=13, -32<=l<=23                                                                               |
| Reflections collected / unique    | 14054 / 5149 [R(int) = 0.0543]                                                                                   |
| Completeness to theta = 26.99     | 99.7 %                                                                                                           |
| Absorption correction             | Empirical                                                                                                        |
| Max. and min. transmission        | 1.00000 and 0.64925                                                                                              |
| Refinement method                 | Full-matrix least-squares on F <sup>2</sup>                                                                      |
| Data / restraints / parameters    | 5149 / 1 / 309                                                                                                   |
| Goodness-of-fit on F <sup>2</sup> | 0.847                                                                                                            |
| Final R indices [I>2sigma(I)]     | R1 = 0.0407, wR2 = 0.0785                                                                                        |
| R indices (all data)              | R1 = 0.0653, wR2 = 0.0830                                                                                        |
| Absolute structure parameter      | 0.002(7)                                                                                                         |
| Extinction coefficient            | 0.0101(6)                                                                                                        |
| Largest diff. peak and hole       | 0.475 and -0.443 e.Å <sup>-3</sup>                                                                               |

Table 2. Atomic coordinates ( $\times 10^4$ ) and equivalent isotropic displacement parameters ( $\text{\AA}^2 \times 10^3$ ) for cd26535.  $U(\text{eq})$  is defined as one third of the trace of the orthogonalized  $U_{ij}$  tensor.

|       | x        | y       | z       | $U(\text{eq})$ |
|-------|----------|---------|---------|----------------|
| Br    | 4370(1)  | 4310(1) | 9643(1) | 93(1)          |
| S(1)  | 3306(1)  | 1977(1) | 6398(1) | 42(1)          |
| O(1)  | -59(3)   | 6504(2) | 7665(1) | 56(1)          |
| O(2)  | 145(2)   | 4405(2) | 7464(1) | 39(1)          |
| O(3)  | 2333(3)  | 6856(2) | 6315(1) | 87(1)          |
| O(4)  | 3721(2)  | 983(2)  | 6757(1) | 60(1)          |
| O(5)  | 4413(2)  | 2753(2) | 6148(1) | 54(1)          |
| N(1)  | 2260(3)  | 2954(2) | 6720(1) | 40(1)          |
| C(1)  | -529(3)  | 4637(3) | 6980(1) | 37(1)          |
| C(2)  | -2058(3) | 4837(3) | 6956(1) | 49(1)          |
| C(3)  | -2706(4) | 4955(4) | 6480(2) | 65(1)          |
| C(4)  | -1863(4) | 4908(3) | 6034(1) | 64(1)          |
| C(5)  | -348(4)  | 4729(3) | 6069(1) | 52(1)          |
| C(6)  | 355(3)   | 4576(3) | 6543(1) | 36(1)          |
| C(7)  | 2016(3)  | 4300(3) | 6566(1) | 34(1)          |
| C(8)  | 2911(3)  | 5224(3) | 6900(1) | 36(1)          |
| C(9)  | 3713(3)  | 4846(3) | 7301(1) | 51(1)          |
| C(10) | 2920(4)  | 6572(3) | 6721(1) | 53(1)          |
| C(11) | 3690(6)  | 7589(4) | 7044(2) | 104(2)         |
| C(12) | 370(3)   | 5449(3) | 7777(1) | 41(1)          |
| C(13) | 1245(3)  | 5096(3) | 8244(1) | 43(1)          |
| C(14) | 1749(4)  | 6108(3) | 8551(1) | 51(1)          |
| C(15) | 2651(4)  | 5866(4) | 8975(1) | 61(1)          |
| C(16) | 3044(4)  | 4634(4) | 9084(1) | 56(1)          |
| C(17) | 2547(4)  | 3612(4) | 8790(1) | 65(1)          |
| C(18) | 1635(4)  | 3851(3) | 8365(1) | 55(1)          |
| C(19) | 2225(3)  | 1247(3) | 5907(1) | 40(1)          |
| C(20) | 1755(3)  | 1960(3) | 5485(1) | 52(1)          |
| C(21) | 879(4)   | 1401(3) | 5111(1) | 57(1)          |
| C(22) | 487(4)   | 132(3)  | 5137(1) | 52(1)          |
| C(23) | 981(3)   | -590(3) | 5554(1) | 54(1)          |
| C(24) | 1833(4)  | -38(3)  | 5940(1) | 47(1)          |
| C(25) | -475(4)  | -478(4) | 4720(1) | 75(1)          |

Table 3. Bond lengths [Å] and angles [deg] for cd26535.

|                 |             |
|-----------------|-------------|
| Br-C(16)        | 1.894 (3)   |
| S(1)-O(4)       | 1.430 (2)   |
| S(1)-O(5)       | 1.430 (2)   |
| S(1)-N(1)       | 1.609 (3)   |
| S(1)-C(19)      | 1.760 (3)   |
| O(1)-C(12)      | 1.194 (3)   |
| O(2)-C(12)      | 1.360 (3)   |
| O(2)-C(1)       | 1.402 (3)   |
| O(3)-C(10)      | 1.204 (4)   |
| N(1)-C(7)       | 1.466 (4)   |
| N(1)-H(1)       | 0.813 (17)  |
| C(1)-C(6)       | 1.375 (4)   |
| C(1)-C(2)       | 1.390 (4)   |
| C(2)-C(3)       | 1.358 (4)   |
| C(2)-H(2)       | 0.9300      |
| C(3)-C(4)       | 1.374 (5)   |
| C(3)-H(3)       | 0.9300      |
| C(4)-C(5)       | 1.376 (5)   |
| C(4)-H(4)       | 0.9300      |
| C(5)-C(6)       | 1.380 (4)   |
| C(5)-H(5)       | 0.9300      |
| C(6)-C(7)       | 1.519 (4)   |
| C(7)-C(8)       | 1.516 (4)   |
| C(7)-H(7)       | 0.93 (2)    |
| C(8)-C(9)       | 1.314 (4)   |
| C(8)-C(10)      | 1.469 (4)   |
| C(9)-H(9A)      | 0.9300      |
| C(9)-H(9B)      | 0.9300      |
| C(10)-C(11)     | 1.508 (5)   |
| C(11)-H(11A)    | 0.9600      |
| C(11)-H(11B)    | 0.9600      |
| C(11)-H(11C)    | 0.9600      |
| C(12)-C(13)     | 1.478 (4)   |
| C(13)-C(18)     | 1.371 (4)   |
| C(13)-C(14)     | 1.387 (4)   |
| C(14)-C(15)     | 1.378 (4)   |
| C(14)-H(14)     | 0.9300      |
| C(15)-C(16)     | 1.353 (5)   |
| C(15)-H(15)     | 0.9300      |
| C(16)-C(17)     | 1.374 (5)   |
| C(17)-C(18)     | 1.384 (4)   |
| C(17)-H(17)     | 0.9300      |
| C(18)-H(18)     | 0.9300      |
| C(19)-C(20)     | 1.376 (4)   |
| C(19)-C(24)     | 1.379 (4)   |
| C(20)-C(21)     | 1.369 (4)   |
| C(20)-H(20)     | 0.9300      |
| C(21)-C(22)     | 1.362 (4)   |
| C(21)-H(21)     | 0.9300      |
| C(22)-C(23)     | 1.378 (4)   |
| C(22)-C(25)     | 1.512 (4)   |
| C(23)-C(24)     | 1.375 (4)   |
| C(23)-H(23)     | 0.9300      |
| C(24)-H(24)     | 0.9300      |
| C(25)-H(25A)    | 0.9600      |
| C(25)-H(25B)    | 0.9600      |
| C(25)-H(25C)    | 0.9600      |
| O(4)-S(1)-O(5)  | 120.79 (13) |
| O(4)-S(1)-N(1)  | 105.88 (14) |
| O(5)-S(1)-N(1)  | 106.41 (14) |
| O(4)-S(1)-C(19) | 107.16 (14) |
| O(5)-S(1)-C(19) | 107.69 (13) |
| N(1)-S(1)-C(19) | 108.43 (13) |
| C(12)-O(2)-C(1) | 116.8 (2)   |
| C(7)-N(1)-S(1)  | 123.1 (2)   |
| C(7)-N(1)-H(1)  | 119 (2)     |
| S(1)-N(1)-H(1)  | 114 (2)     |

|                     |           |
|---------------------|-----------|
| C(6)-C(1)-C(2)      | 122.7(3)  |
| C(6)-C(1)-O(2)      | 117.7(2)  |
| C(2)-C(1)-O(2)      | 119.4(3)  |
| C(3)-C(2)-C(1)      | 118.5(3)  |
| C(3)-C(2)-H(2)      | 120.8     |
| C(1)-C(2)-H(2)      | 120.8     |
| C(2)-C(3)-C(4)      | 120.7(3)  |
| C(2)-C(3)-H(3)      | 119.7     |
| C(4)-C(3)-H(3)      | 119.7     |
| C(3)-C(4)-C(5)      | 119.6(3)  |
| C(3)-C(4)-H(4)      | 120.2     |
| C(5)-C(4)-H(4)      | 120.2     |
| C(4)-C(5)-C(6)      | 121.7(3)  |
| C(4)-C(5)-H(5)      | 119.1     |
| C(6)-C(5)-H(5)      | 119.1     |
| C(1)-C(6)-C(5)      | 116.7(3)  |
| C(1)-C(6)-C(7)      | 123.0(2)  |
| C(5)-C(6)-C(7)      | 120.3(2)  |
| N(1)-C(7)-C(8)      | 111.6(2)  |
| N(1)-C(7)-C(6)      | 109.6(2)  |
| C(8)-C(7)-C(6)      | 115.1(2)  |
| N(1)-C(7)-H(7)      | 105.1(14) |
| C(8)-C(7)-H(7)      | 106.4(13) |
| C(6)-C(7)-H(7)      | 108.5(12) |
| C(9)-C(8)-C(10)     | 121.7(3)  |
| C(9)-C(8)-C(7)      | 123.0(3)  |
| C(10)-C(8)-C(7)     | 115.1(3)  |
| C(8)-C(9)-H(9A)     | 120.0     |
| C(8)-C(9)-H(9B)     | 120.0     |
| H(9A)-C(9)-H(9B)    | 120.0     |
| O(3)-C(10)-C(8)     | 120.1(3)  |
| O(3)-C(10)-C(11)    | 120.4(3)  |
| C(8)-C(10)-C(11)    | 119.6(3)  |
| C(10)-C(11)-H(11A)  | 109.5     |
| C(10)-C(11)-H(11B)  | 109.5     |
| H(11A)-C(11)-H(11B) | 109.5     |
| C(10)-C(11)-H(11C)  | 109.5     |
| H(11A)-C(11)-H(11C) | 109.5     |
| H(11B)-C(11)-H(11C) | 109.5     |
| O(1)-C(12)-O(2)     | 122.4(3)  |
| O(1)-C(12)-C(13)    | 126.4(3)  |
| O(2)-C(12)-C(13)    | 111.1(3)  |
| C(18)-C(13)-C(14)   | 119.9(3)  |
| C(18)-C(13)-C(12)   | 123.5(3)  |
| C(14)-C(13)-C(12)   | 116.5(3)  |
| C(15)-C(14)-C(13)   | 120.1(3)  |
| C(15)-C(14)-H(14)   | 119.9     |
| C(13)-C(14)-H(14)   | 119.9     |
| C(16)-C(15)-C(14)   | 119.2(3)  |
| C(16)-C(15)-H(15)   | 120.4     |
| C(14)-C(15)-H(15)   | 120.4     |
| C(15)-C(16)-C(17)   | 121.9(3)  |
| C(15)-C(16)-Br      | 119.2(3)  |
| C(17)-C(16)-Br      | 118.9(3)  |
| C(16)-C(17)-C(18)   | 119.1(3)  |
| C(16)-C(17)-H(17)   | 120.5     |
| C(18)-C(17)-H(17)   | 120.5     |
| C(13)-C(18)-C(17)   | 119.8(3)  |
| C(13)-C(18)-H(18)   | 120.1     |
| C(17)-C(18)-H(18)   | 120.1     |
| C(20)-C(19)-C(24)   | 119.2(3)  |
| C(20)-C(19)-S(1)    | 120.1(3)  |
| C(24)-C(19)-S(1)    | 120.7(2)  |
| C(21)-C(20)-C(19)   | 120.0(3)  |
| C(21)-C(20)-H(20)   | 120.0     |
| C(19)-C(20)-H(20)   | 120.0     |
| C(22)-C(21)-C(20)   | 121.5(3)  |
| C(22)-C(21)-H(21)   | 119.3     |
| C(20)-C(21)-H(21)   | 119.3     |
| C(21)-C(22)-C(23)   | 118.5(3)  |
| C(21)-C(22)-C(25)   | 121.1(3)  |
| C(23)-C(22)-C(25)   | 120.4(3)  |

|                        |           |
|------------------------|-----------|
| C (24)-C (23)-C (22)   | 120.8 (3) |
| C (24)-C (23)-H (23)   | 119.6     |
| C (22)-C (23)-H (23)   | 119.6     |
| C (23)-C (24)-C (19)   | 119.9 (3) |
| C (23)-C (24)-H (24)   | 120.1     |
| C (19)-C (24)-H (24)   | 120.1     |
| C (22)-C (25)-H (25A)  | 109.5     |
| C (22)-C (25)-H (25B)  | 109.5     |
| H (25A)-C (25)-H (25B) | 109.5     |
| C (22)-C (25)-H (25C)  | 109.5     |
| H (25A)-C (25)-H (25C) | 109.5     |
| H (25B)-C (25)-H (25C) | 109.5     |

---

Symmetry transformations used to generate equivalent atoms:

Table 4. Anisotropic displacement parameters ( $\text{\AA}^2 \times 10^3$ ) for cd26535.  
 The anisotropic displacement factor exponent takes the form:  
 $-2 \pi^2 [ h^2 a^{*2} U_{11} + \dots + 2 h k a^* b^* U_{12} ]$

|       | U11    | U22    | U33    | U23    | U13    | U12    |
|-------|--------|--------|--------|--------|--------|--------|
| Br    | 80(1)  | 133(1) | 65(1)  | 2(1)   | -19(1) | 6(1)   |
| S(1)  | 41(1)  | 36(1)  | 49(1)  | -2(1)  | 1(1)   | 6(1)   |
| O(1)  | 79(2)  | 35(1)  | 53(1)  | -6(1)  | 1(1)   | 15(1)  |
| O(2)  | 49(1)  | 33(1)  | 36(1)  | -2(1)  | 1(1)   | 2(1)   |
| O(3)  | 128(2) | 45(2)  | 89(2)  | 19(1)  | -29(2) | -10(2) |
| O(4)  | 72(2)  | 44(1)  | 63(1)  | 4(1)   | -19(1) | 12(1)  |
| O(5)  | 40(1)  | 54(1)  | 68(1)  | -7(1)  | 15(1)  | 0(1)   |
| N(1)  | 45(1)  | 29(1)  | 44(2)  | 5(1)   | 11(1)  | -1(1)  |
| C(1)  | 45(2)  | 27(2)  | 40(2)  | -3(1)  | 0(2)   | 0(1)   |
| C(2)  | 37(2)  | 50(2)  | 59(2)  | -1(2)  | 6(2)   | -2(2)  |
| C(3)  | 40(2)  | 72(3)  | 84(3)  | -1(2)  | -12(2) | 6(2)   |
| C(4)  | 59(2)  | 78(3)  | 55(2)  | 2(2)   | -20(2) | 8(2)   |
| C(5)  | 51(2)  | 66(2)  | 39(2)  | -1(2)  | -5(2)  | 5(2)   |
| C(6)  | 39(2)  | 31(2)  | 38(2)  | 0(1)   | -3(1)  | -1(1)  |
| C(7)  | 40(2)  | 32(2)  | 30(2)  | 3(1)   | 4(1)   | 0(1)   |
| C(8)  | 33(2)  | 37(2)  | 38(2)  | -1(1)  | 4(1)   | 2(1)   |
| C(9)  | 44(2)  | 50(2)  | 57(2)  | -4(2)  | -4(2)  | -2(2)  |
| C(10) | 55(2)  | 44(2)  | 59(2)  | -1(2)  | 1(2)   | -1(2)  |
| C(11) | 144(4) | 50(3)  | 119(4) | -12(2) | -36(3) | -24(3) |
| C(12) | 41(2)  | 44(2)  | 37(2)  | -7(2)  | 9(1)   | -3(2)  |
| C(13) | 54(2)  | 41(2)  | 36(2)  | -6(2)  | 12(2)  | 0(2)   |
| C(14) | 59(2)  | 42(2)  | 52(2)  | -5(2)  | 9(2)   | -6(2)  |
| C(15) | 62(2)  | 72(3)  | 49(2)  | -13(2) | 4(2)   | -22(2) |
| C(16) | 56(2)  | 71(3)  | 40(2)  | -5(2)  | 0(2)   | 3(2)   |
| C(17) | 87(3)  | 63(3)  | 46(2)  | 6(2)   | 1(2)   | 11(2)  |
| C(18) | 78(2)  | 44(2)  | 43(2)  | -3(2)  | 1(2)   | 2(2)   |
| C(19) | 45(2)  | 41(2)  | 33(2)  | -3(1)  | 8(1)   | 8(1)   |
| C(20) | 70(2)  | 39(2)  | 45(2)  | 4(2)   | 3(2)   | -1(2)  |
| C(21) | 76(3)  | 55(2)  | 40(2)  | 4(2)   | -2(2)  | 5(2)   |
| C(22) | 50(2)  | 56(2)  | 49(2)  | -4(2)  | 3(2)   | 2(2)   |
| C(23) | 61(2)  | 42(2)  | 60(2)  | -8(2)  | 8(2)   | -10(2) |
| C(24) | 55(2)  | 35(2)  | 52(2)  | 5(2)   | 2(2)   | 4(2)   |
| C(25) | 72(2)  | 81(3)  | 70(2)  | -15(2) | -6(2)  | -16(2) |

Table 5. Hydrogen coordinates ( $\times 10^4$ ) and isotropic displacement parameters ( $\text{\AA}^2 \times 10^3$ ) for cd26535.

|        | x        | y        | z       | U(eq) |
|--------|----------|----------|---------|-------|
| H(2)   | -2624    | 4889     | 7259    | 58    |
| H(3)   | -3731    | 5068     | 6456    | 78    |
| H(4)   | -2313    | 4997     | 5709    | 77    |
| H(5)   | 217      | 4710     | 5765    | 62    |
| H(9A)  | 4306     | 5436     | 7479    | 61    |
| H(9B)  | 3687     | 3987     | 7407    | 61    |
| H(11A) | 4722     | 7365     | 7084    | 127   |
| H(11B) | 3227     | 7639     | 7380    | 127   |
| H(11C) | 3613     | 8410     | 6872    | 127   |
| H(14)  | 1478     | 6952     | 8471    | 61    |
| H(15)  | 2985     | 6541     | 9183    | 73    |
| H(17)  | 2819     | 2771     | 8875    | 78    |
| H(18)  | 1288     | 3169     | 8163    | 66    |
| H(20)  | 2031     | 2823     | 5455    | 62    |
| H(21)  | 546      | 1898     | 4833    | 68    |
| H(23)  | 735      | -1461    | 5575    | 65    |
| H(24)  | 2144     | -531     | 6223    | 57    |
| H(25A) | -203     | -1369    | 4679    | 112   |
| H(25B) | -331     | -31      | 4396    | 112   |
| H(25C) | -1503    | -421     | 4821    | 112   |
| H(7)   | 2400(20) | 4360(20) | 6229(8) | 58(5) |
| H(1)   | 1640(30) | 2600(30) | 6900(9) | 42(9) |

Table 6. Torsion angles [deg] for cd26535.

|                         |           |
|-------------------------|-----------|
| O(4)-S(1)-N(1)-C(7)     | 158.2(2)  |
| O(5)-S(1)-N(1)-C(7)     | 28.5(3)   |
| C(19)-S(1)-N(1)-C(7)    | -87.1(2)  |
| C(12)-O(2)-C(1)-C(6)    | 106.3(3)  |
| C(12)-O(2)-C(1)-C(2)    | -77.6(3)  |
| C(6)-C(1)-C(2)-C(3)     | 1.1(5)    |
| O(2)-C(1)-C(2)-C(3)     | -174.7(3) |
| C(1)-C(2)-C(3)-C(4)     | -1.5(5)   |
| C(2)-C(3)-C(4)-C(5)     | 0.6(6)    |
| C(3)-C(4)-C(5)-C(6)     | 0.9(5)    |
| C(2)-C(1)-C(6)-C(5)     | 0.3(4)    |
| O(2)-C(1)-C(6)-C(5)     | 176.1(2)  |
| C(2)-C(1)-C(6)-C(7)     | -177.3(3) |
| O(2)-C(1)-C(6)-C(7)     | -1.4(4)   |
| C(4)-C(5)-C(6)-C(1)     | -1.3(5)   |
| C(4)-C(5)-C(6)-C(7)     | 176.3(3)  |
| S(1)-N(1)-C(7)-C(8)     | -103.1(2) |
| S(1)-N(1)-C(7)-C(6)     | 128.2(2)  |
| C(1)-C(6)-C(7)-N(1)     | 69.8(3)   |
| C(5)-C(6)-C(7)-N(1)     | -107.6(3) |
| C(1)-C(6)-C(7)-C(8)     | -56.9(4)  |
| C(5)-C(6)-C(7)-C(8)     | 125.6(3)  |
| N(1)-C(7)-C(8)-C(9)     | -4.6(4)   |
| C(6)-C(7)-C(8)-C(9)     | 121.1(3)  |
| N(1)-C(7)-C(8)-C(10)    | 170.7(2)  |
| C(6)-C(7)-C(8)-C(10)    | -63.6(3)  |
| C(9)-C(8)-C(10)-O(3)    | 170.3(3)  |
| C(7)-C(8)-C(10)-O(3)    | -5.1(4)   |
| C(9)-C(8)-C(10)-C(11)   | -8.7(5)   |
| C(7)-C(8)-C(10)-C(11)   | 175.9(3)  |
| C(1)-O(2)-C(12)-O(1)    | 4.4(4)    |
| C(1)-O(2)-C(12)-C(13)   | -173.2(2) |
| O(1)-C(12)-C(13)-C(18)  | 176.3(3)  |
| O(2)-C(12)-C(13)-C(18)  | -6.2(4)   |
| O(1)-C(12)-C(13)-C(14)  | -7.3(5)   |
| O(2)-C(12)-C(13)-C(14)  | 170.1(3)  |
| C(18)-C(13)-C(14)-C(15) | 0.6(5)    |
| C(12)-C(13)-C(14)-C(15) | -175.9(3) |
| C(13)-C(14)-C(15)-C(16) | 0.5(5)    |
| C(14)-C(15)-C(16)-C(17) | -1.3(5)   |
| C(14)-C(15)-C(16)-Br    | 176.6(2)  |
| C(15)-C(16)-C(17)-C(18) | 1.0(5)    |
| Br-C(16)-C(17)-C(18)    | -176.9(3) |
| C(14)-C(13)-C(18)-C(17) | -0.9(5)   |
| C(12)-C(13)-C(18)-C(17) | 175.4(3)  |
| C(16)-C(17)-C(18)-C(13) | 0.1(5)    |
| O(4)-S(1)-C(19)-C(20)   | -175.4(2) |
| O(5)-S(1)-C(19)-C(20)   | -44.1(3)  |
| N(1)-S(1)-C(19)-C(20)   | 70.7(3)   |
| O(4)-S(1)-C(19)-C(24)   | 5.0(3)    |
| O(5)-S(1)-C(19)-C(24)   | 136.3(2)  |
| N(1)-S(1)-C(19)-C(24)   | -108.9(3) |
| C(24)-C(19)-C(20)-C(21) | 1.4(5)    |
| S(1)-C(19)-C(20)-C(21)  | -178.2(2) |
| C(19)-C(20)-C(21)-C(22) | -1.7(5)   |
| C(20)-C(21)-C(22)-C(23) | 0.5(5)    |
| C(20)-C(21)-C(22)-C(25) | -179.8(3) |
| C(21)-C(22)-C(23)-C(24) | 1.0(5)    |
| C(25)-C(22)-C(23)-C(24) | -178.8(3) |
| C(22)-C(23)-C(24)-C(19) | -1.2(5)   |
| C(20)-C(19)-C(24)-C(23) | 0.0(5)    |
| S(1)-C(19)-C(24)-C(23)  | 179.6(2)  |

Symmetry transformations used to generate equivalent atoms:



Table 6. Torsion angles [deg] for cd26535.

|                         |           |
|-------------------------|-----------|
| O(4)-S(1)-N(1)-C(7)     | 158.2(2)  |
| O(5)-S(1)-N(1)-C(7)     | 28.5(3)   |
| C(19)-S(1)-N(1)-C(7)    | -87.1(2)  |
| C(12)-O(2)-C(1)-C(6)    | 106.3(3)  |
| C(12)-O(2)-C(1)-C(2)    | -77.6(3)  |
| C(6)-C(1)-C(2)-C(3)     | 1.1(5)    |
| O(2)-C(1)-C(2)-C(3)     | -174.7(3) |
| C(1)-C(2)-C(3)-C(4)     | -1.5(5)   |
| C(2)-C(3)-C(4)-C(5)     | 0.6(6)    |
| C(3)-C(4)-C(5)-C(6)     | 0.9(5)    |
| C(2)-C(1)-C(6)-C(5)     | 0.3(4)    |
| O(2)-C(1)-C(6)-C(5)     | 176.1(2)  |
| C(2)-C(1)-C(6)-C(7)     | -177.3(3) |
| O(2)-C(1)-C(6)-C(7)     | -1.4(4)   |
| C(4)-C(5)-C(6)-C(1)     | -1.3(5)   |
| C(4)-C(5)-C(6)-C(7)     | 176.3(3)  |
| S(1)-N(1)-C(7)-C(8)     | -103.1(2) |
| S(1)-N(1)-C(7)-C(6)     | 128.2(2)  |
| C(1)-C(6)-C(7)-N(1)     | 69.8(3)   |
| C(5)-C(6)-C(7)-N(1)     | -107.6(3) |
| C(1)-C(6)-C(7)-C(8)     | -56.9(4)  |
| C(5)-C(6)-C(7)-C(8)     | 125.6(3)  |
| N(1)-C(7)-C(8)-C(9)     | -4.6(4)   |
| C(6)-C(7)-C(8)-C(9)     | 121.1(3)  |
| N(1)-C(7)-C(8)-C(10)    | 170.7(2)  |
| C(6)-C(7)-C(8)-C(10)    | -63.6(3)  |
| C(9)-C(8)-C(10)-O(3)    | 170.3(3)  |
| C(7)-C(8)-C(10)-O(3)    | -5.1(4)   |
| C(9)-C(8)-C(10)-C(11)   | -8.7(5)   |
| C(7)-C(8)-C(10)-C(11)   | 175.9(3)  |
| C(1)-O(2)-C(12)-O(1)    | 4.4(4)    |
| C(1)-O(2)-C(12)-C(13)   | -173.2(2) |
| O(1)-C(12)-C(13)-C(18)  | 176.3(3)  |
| O(2)-C(12)-C(13)-C(18)  | -6.2(4)   |
| O(1)-C(12)-C(13)-C(14)  | -7.3(5)   |
| O(2)-C(12)-C(13)-C(14)  | 170.1(3)  |
| C(18)-C(13)-C(14)-C(15) | 0.6(5)    |
| C(12)-C(13)-C(14)-C(15) | -175.9(3) |
| C(13)-C(14)-C(15)-C(16) | 0.5(5)    |
| C(14)-C(15)-C(16)-C(17) | -1.3(5)   |
| C(14)-C(15)-C(16)-Br    | 176.6(2)  |
| C(15)-C(16)-C(17)-C(18) | 1.0(5)    |
| Br-C(16)-C(17)-C(18)    | -176.9(3) |
| C(14)-C(13)-C(18)-C(17) | -0.9(5)   |
| C(12)-C(13)-C(18)-C(17) | 175.4(3)  |
| C(16)-C(17)-C(18)-C(13) | 0.1(5)    |
| O(4)-S(1)-C(19)-C(20)   | -175.4(2) |
| O(5)-S(1)-C(19)-C(20)   | -44.1(3)  |
| N(1)-S(1)-C(19)-C(20)   | 70.7(3)   |
| O(4)-S(1)-C(19)-C(24)   | 5.0(3)    |
| O(5)-S(1)-C(19)-C(24)   | 136.3(2)  |
| N(1)-S(1)-C(19)-C(24)   | -108.9(3) |
| C(24)-C(19)-C(20)-C(21) | 1.4(5)    |
| S(1)-C(19)-C(20)-C(21)  | -178.2(2) |
| C(19)-C(20)-C(21)-C(22) | -1.7(5)   |
| C(20)-C(21)-C(22)-C(23) | 0.5(5)    |
| C(20)-C(21)-C(22)-C(25) | -179.8(3) |
| C(21)-C(22)-C(23)-C(24) | 1.0(5)    |
| C(25)-C(22)-C(23)-C(24) | -178.8(3) |
| C(22)-C(23)-C(24)-C(19) | -1.2(5)   |
| C(20)-C(19)-C(24)-C(23) | 0.0(5)    |
| S(1)-C(19)-C(24)-C(23)  | 179.6(2)  |

Symmetry transformations used to generate equivalent atoms:

Table 7. Hydrogen bonds for cd26535 [Å and deg.].

| D-H...A            | d(D-H)    | d(H...A)  | d(D...A) | <(DHA) |
|--------------------|-----------|-----------|----------|--------|
| N(1)-H(1)...O(1)#1 | 0.813(17) | 2.130(18) | 2.941(3) | 174(3) |

Symmetry transformations used to generate equivalent atoms:  
#1 -x, y-1/2, -z+3/2
